# Supplementary material for: Palladium-catalyzed stereocontrolled ring-opening of 7-oxabenzonorbornadienes with organic carboxylic acids
Source: Royal Society of Chemistry journal article supplement (doi:10.1039/d3cc00604b), 2023-01-01

## **Palladium-catalyzed stereocontrolled ring-opening of 7-oxabenzonorbornadienes with organic carboxylic acids**

*Velautham Saravanan and Masilamani Jeganmohan\**

Department of Chemistry, Indian Institute of Technology Madras, Chennai 600036, Tamil Nadu, India

E-mail: mjeganmohan@iitm.ac.in

### **Electronic Supporting Information (ESI)**

#### Table of Contents

|           |                                                                                            |
|-----------|--------------------------------------------------------------------------------------------|
| S2 – S5   | Experimental Section                                                                       |
| S6 – S7   | Optimization studies and Unsuccessful substrates                                           |
| S8 – S9   | X-Ray analysis                                                                             |
| S10       | References                                                                                 |
| S11 – S24 | Spectral Data of all Compounds                                                             |
| S25 – S55 | Copies of $^1\text{H}$ , $^{13}\text{C}$ NMR and $^{19}\text{F}$ NMR Spectra of Compounds. |

## Experimental Section

**General Information:** All reactions were carried out under the air atmosphere in flame-dried glassware. Syringes which were used to transfer anhydrous solvents or reagents were purged with nitrogen prior to use (three times). Dry solvents were used for the reaction. Column chromatography purifications were performed using SiO<sub>2</sub> (100-200 mesh ASTM) from Merck if not indicated otherwise. Abbreviations for signal coupling are as follows: s, singlet; d, doublet; t, triplet; q, quartet; m, multiplet. Starting Materials: carboxylic acid,<sup>1</sup> 7-oxabenzonorbornadienes,<sup>2</sup> Pd<sub>2</sub>(dba)<sub>3</sub>, were prepared according to literature procedures. Commercially available metal salts and other chemicals were purchased from Sigma-Aldrich and Spectrochem. Pvt. Ltd., India and used without further purification.

### Preparation of Starting Materials

7-Oxabenzonorbornadienes and substituted 7-Oxabenzonorbornadienes (**2a–g**) were prepared by the known reported procedure.<sup>2</sup>

### Procedure for the Palladium-Catalyzed Reaction of 7-Oxabenzonorbornadienes **2a** with Carboxylic Acid **1a**

A 15-mL pressure tube with septum containing Pd(dba)<sub>2</sub> (0.017 mmol, 5 mol %), and Oxabenzonorbornadienes **2a** (100 mg, 0.694 mmol, 2 equiv) was added under the open-air conditions. To the tube, were then added 1-admantanecarboxylic acid **1a** (62.5 mg, 0.347 mmol, 1 equiv) in 1,4-dioxane (2 mL, 0.17 M) *via* syringe sequentially and the reaction mixture was stirred at room temperature for 5 minutes. Then the reaction mixture was allowed to stir at 80 °C for 12 h in an oil bath. Then, the reaction mixture was diluted with CH<sub>2</sub>Cl<sub>2</sub>, filtered through celite, and the filtrate was concentrated. The crude residue was purified through a silica gel column using petroleum ether and ethyl acetate as eluent to give pure desired product **3aa** (127 mg, 78%).

### Intermediate Isolation

a) Intermediate isolation

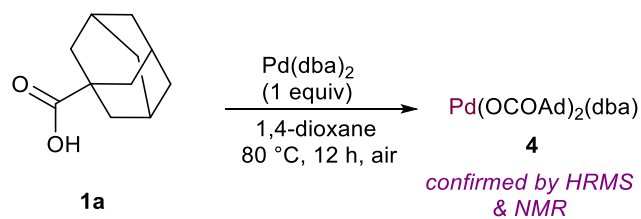

Chemical formula of complex **9a**:  $\text{C}_{39}\text{H}_{44}\text{O}_5\text{Pd}$

**HRMS (ESI/Q-TOF):**  $[\text{M} + \text{H}]^+$  Calcd for  $\text{C}_{39}\text{H}_{48}\text{NO}_5\text{Pd}$  718.2566; Found 718.2431.

$^1\text{H}$  and  $^{13}\text{C}$  NMR Spectra of Compound **4** ( $\text{CDCl}_3$ , 400 MHz)

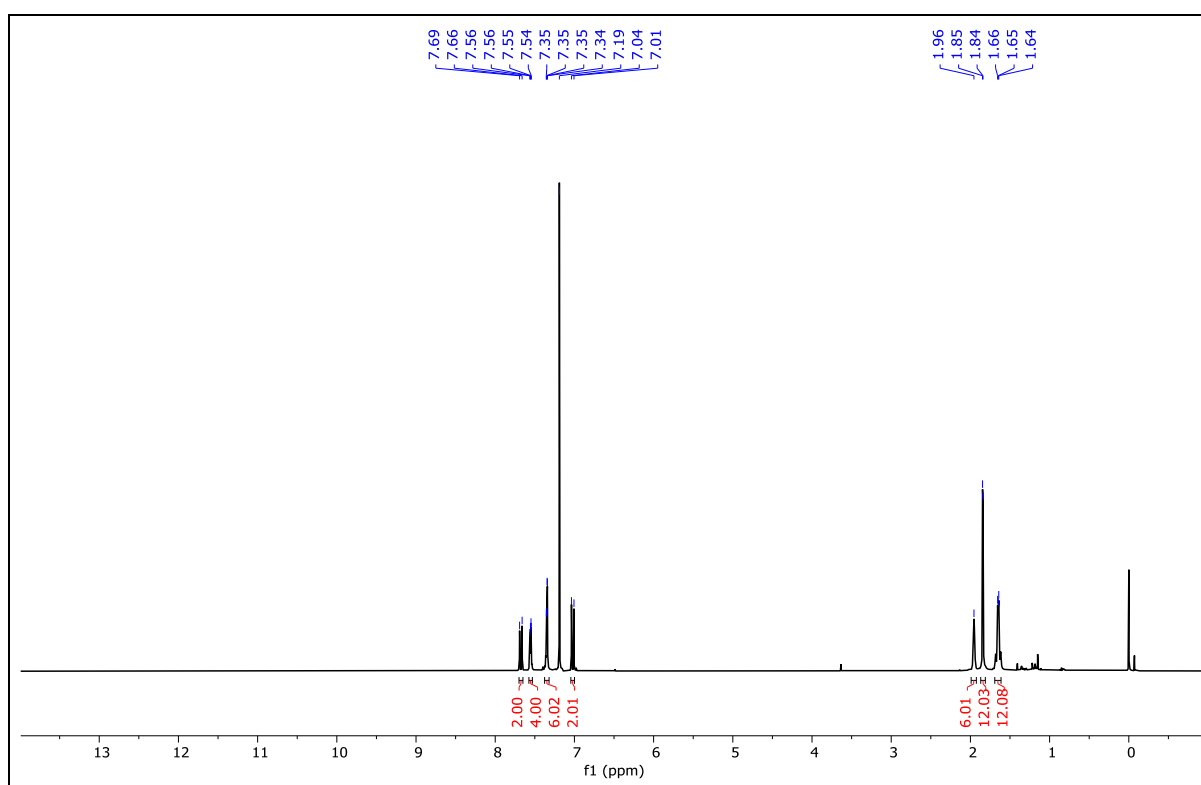

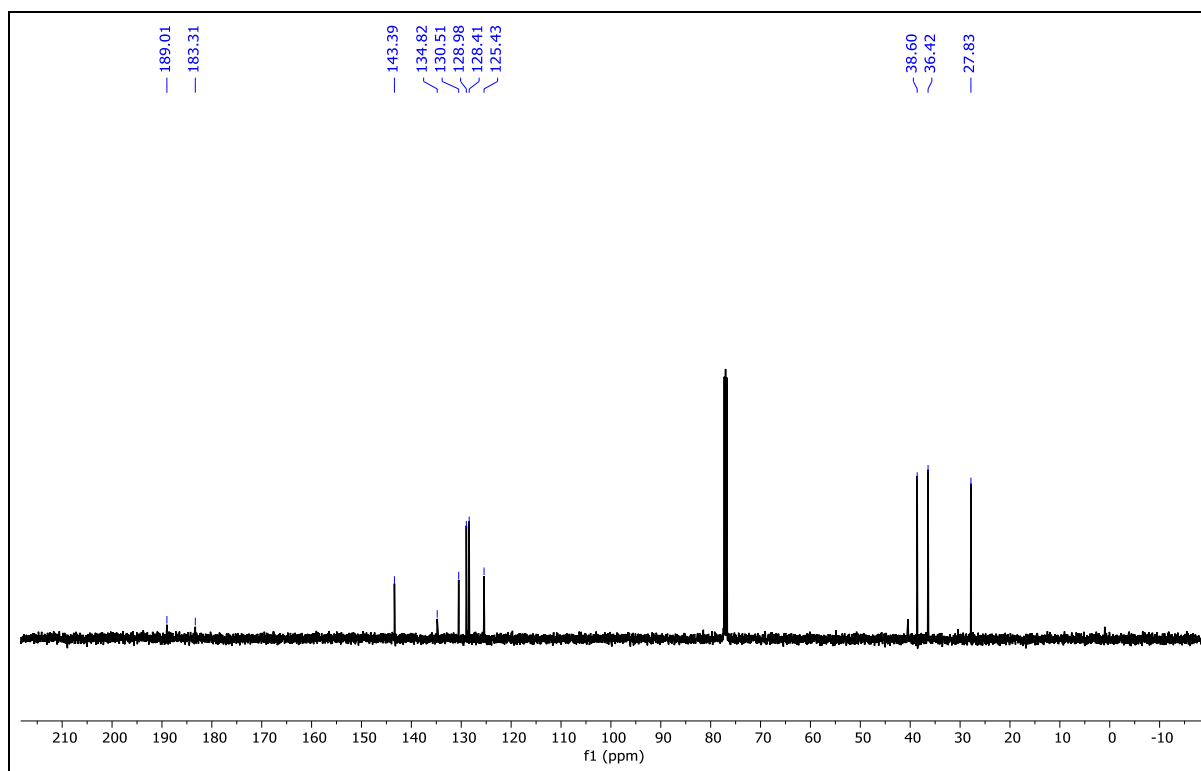

## Mechanistic Studies

### Procedure for Competition Reaction between Aliphatic Acids.

A 15-mL pressure tube with septum containing Pd(dba)<sub>2</sub> (5 mol %), and Oxabenzonorbornadienes **2** (0.25 mmol, 1.0 equiv) was added under the open air conditions. To the tube, were then added 1-adamantecarboxylic acid **1a** (0.25 mmol, 1.0 equiv) and acetic acid **1c** (0.25 mmol, 1.0 equiv) in 1,4-dioxane (0.17 M) *via* syringe sequentially and the reaction mixture was stirred at room temperature for 5 minutes. Then the reaction mixture was allowed to stir at 80 °C for 12 h in an oil bath. Then, the reaction mixture was diluted with CH<sub>2</sub>Cl<sub>2</sub>, filtered through celite, and the filtrate was concentrated. The crude residue was purified through a silica gel column using petroleum ether and ethyl acetate as eluent to give pure desired product to give products **3aa** and **3ac** in 33% and 25% yields, respectively.

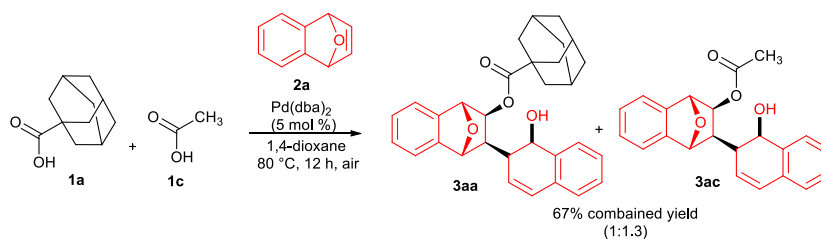

### Procedure for Competition Reaction between Acetic acid and Benzoic acid.

A 15-mL pressure tube with septum containing Pd(dba)<sub>2</sub> (5 mol %), and Oxabenzonorbornadienes **2** (0.25 mmol, 1.0 equiv) was added under the open air conditions. To the tube, were then added acetic acid **1c** (0.25 mmol, 1.0 equiv) and benzoic acid (0.25 mmol, 1.0 equiv) in 1,4-dioxane (0.17 M) *via* syringe sequentially and the reaction mixture was stirred at room temperature for 5 minutes. Then the reaction mixture was allowed to stir at 80 °C for 12 h in an oil bath. Then, the reaction mixture was diluted with CH<sub>2</sub>Cl<sub>2</sub>, filtered through celite, and the filtrate was concentrated. The crude residue was purified through a silica gel column using petroleum ether and ethyl acetate as eluent to give pure desired product to give products **3ca** and **3ka** in 18% and 35% yields, respectively.

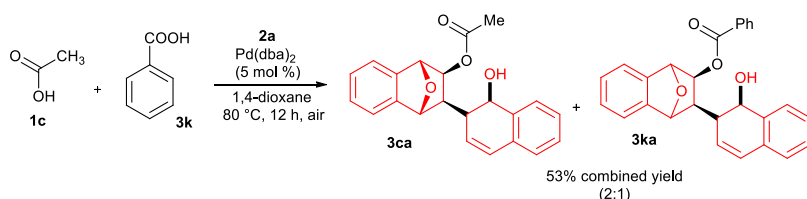

### Procedure for Competition Reaction between Benzoic acids.

A 15-mL pressure tube with septum containing Pd(dba)<sub>2</sub> (5 mol %), and Oxabenzonorbornadienes **2** (0.25 mmol, 1.0 equiv) was added under the open air conditions. To the tube, were then added p-toluic acid **1c** (0.25 mmol, 1.0 equiv) and 4-nitrobenzoic acid (0.25 mmol, 1.0 equiv) in 1,4-dioxane (0.17 M) *via* syringe sequentially and the reaction mixture was stirred at room temperature for 5 minutes. Then the reaction mixture was allowed to stir at 80 °C for 12 h in an oil bath. Then, the reaction mixture was diluted with CH<sub>2</sub>Cl<sub>2</sub>, filtered through celite, and the filtrate was concentrated. The crude residue was purified through a silica gel column using petroleum ether and ethyl acetate as eluent to give pure desired product to give products **3la** and **3na** in 35% and 25% yields, respectively.

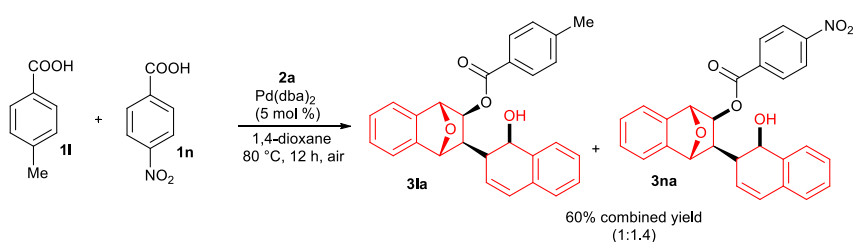

**Table S1. Optimization studies<sup>a</sup>**

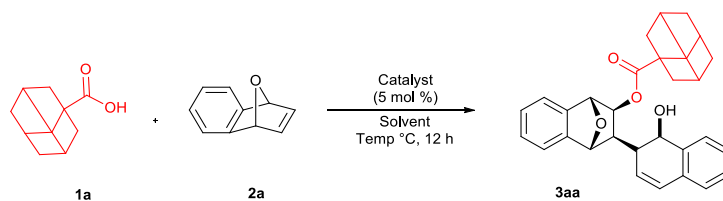

| Entry    | Catalyst                                              | Solvent                            | Temp °C   | Yield % (3aa)   | dr          |
|----------|-------------------------------------------------------|------------------------------------|-----------|-----------------|-------------|
| 1        | Cu(OAc) <sub>2</sub> ·2H <sub>2</sub> O               | 1,4-dioxane                        | 80        | NR              |             |
| 2        | CuCl <sub>2</sub>                                     | 1,4-dioxane                        | 80        | NR              |             |
| 3        | Pd(OAc) <sub>2</sub>                                  | 1,4-dioxane                        | 80        | 53              | 14:1        |
| <b>4</b> | <b>Pd(dba)<sub>2</sub></b>                            | <b>1,4-dioxane</b>                 | <b>80</b> | <b>78</b>       | <b>18:1</b> |
| 5        | PdCl <sub>2</sub>                                     | 1,4-dioxane                        | 80        | 47              | 16:1        |
| 6        | [Pd(PPh <sub>3</sub> ) <sub>2</sub> Cl <sub>2</sub> ] | 1,4-dioxane                        | 80        | trace           |             |
| 7        | Pd(dba) <sub>2</sub>                                  | 1,2-DCE                            | 80        | 45              | 16:1        |
| 8        | Pd(dba) <sub>2</sub>                                  | THF                                | 80        | NA              |             |
| 9        | Pd(dba) <sub>2</sub>                                  | DMF                                | 80        | NR              |             |
| 10       | Pd(dba) <sub>2</sub>                                  | MeOH                               | 80        | 15              |             |
| 11       | Pd(dba) <sub>2</sub>                                  | TFE                                | 80        | 20              |             |
| 12       | Pd(dba) <sub>2</sub>                                  | CH <sub>3</sub> CN                 | 80        | 37              | 10:1        |
| 13       | Pd(dba) <sub>2</sub>                                  | toluene                            | 80        | 50              | 5:1         |
| 14       | Pd(dba) <sub>2</sub>                                  | benzene                            | 80        | 45              | 4:1         |
| 15       | Pd(dba) <sub>2</sub>                                  | DMA                                | 80        | 24              |             |
| 16       | Pd(dba) <sub>2</sub>                                  | DMSO                               | 80        | 12              |             |
| 17       | Pd(dba) <sub>2</sub>                                  | CF <sub>3</sub> CH <sub>2</sub> OH | 80        | 26              |             |
| 18       | Pd(dba) <sub>2</sub>                                  | tBuOH                              | 80        | 19              |             |
| 19       | Pd(dba) <sub>2</sub>                                  | 1,4-dioxane                        | rt        | NR              |             |
| 20       | Pd(dba) <sub>2</sub>                                  | 1,4-dioxane                        | 60        | 61              |             |
| 21       | Pd(dba) <sub>2</sub>                                  | 1,4-dioxane                        | 100       | 56              |             |
| 22       | Pd(dba) <sub>2</sub>                                  | 1,4-dioxane                        | 120       | 39              |             |
| 23       | Pd(dba) <sub>2</sub>                                  | 1,4-dioxane                        | 80        | 12 <sup>b</sup> |             |
| 24       | Pd(dba) <sub>2</sub>                                  | 1,4-dioxane                        | 80        | 15 <sup>c</sup> |             |
| 25       | Pd(dba) <sub>2</sub>                                  | 1,4-dioxane                        | 80        | 25 <sup>d</sup> |             |
| 26       | Pd(dba) <sub>2</sub>                                  | 1,4-dioxane                        | 80        | 12 <sup>e</sup> |             |

<sup>a</sup>All reactions were carried out using Oxabenzonorbornadienes **2a** (100 mg), 1-adamantanecarboxylic acid **1a** (1 equiv), catalyst (5 mol %), and solvent (2 mL) for 12 h. <sup>b</sup>1,10-phenanthroline (10 mol%) was added. <sup>c</sup> 1,2-

bis(diphenylphosphino)ethane (10 mol%) was added. <sup>d</sup>2-acetamido-3-methylbutanoic acid (10 mol%) was added. <sup>e</sup>1 mol% of Pd<sub>2</sub>(dba)<sub>3</sub> was used.

### Unsuccessful substrates 1

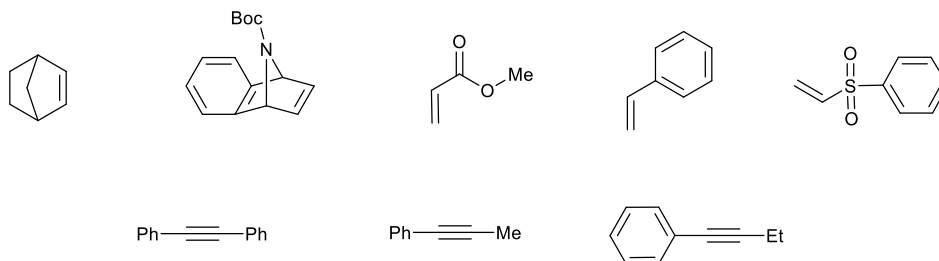

### X-Ray Analysis of Compounds aba (the crystal is having dimeric compound).

|                                   |                                                                                                               |
|-----------------------------------|---------------------------------------------------------------------------------------------------------------|
| Identification code               | <b>3aa</b>                                                                                                    |
| Empirical formula                 | C <sub>31</sub> H <sub>32</sub> O <sub>4</sub>                                                                |
| Formula weight                    | 468.56                                                                                                        |
| Temperature                       | 296(2) K                                                                                                      |
| Wavelength                        | 0.71073 Å                                                                                                     |
| Crystal system,                   | Orthorhombic                                                                                                  |
| Space group                       | P b c a                                                                                                       |
| Unit cell dimensions              | a = 12.880(4) Å    alpha = 90 deg.<br>b = 18.325(7) Å    beta = 90 deg.<br>c = 21.134(8) Å    gamma = 90 deg. |
| Volume                            | 4988(3) Å <sup>3</sup>                                                                                        |
| Z, Calculated density             | 8, 1.248 Mg/m <sup>3</sup>                                                                                    |
| Absorption coefficient            | 0.081 mm <sup>-1</sup>                                                                                        |
| F (000)                           | 2000                                                                                                          |
| Crystal size                      | 0.200 x 0.180 x 0.150 mm                                                                                      |
| Theta range for data collection   | 3.341 to 24.997 deg.                                                                                          |
| Limiting indices                  | -15<=h<=15, -21<=k<=21, -25<=l<=25                                                                            |
| Reflections collected / unique    | 103399 / 4373 [R (int) = 0.0562]                                                                              |
| Completeness to theta = 24.997    | 99.4 %                                                                                                        |
| Absorption correction             | Semi-empirical from equivalents                                                                               |
| Max. And min. transmission        | 0.7457 and 0.6743                                                                                             |
| Refinement method                 | Full-matrix least-squares on F <sup>2</sup>                                                                   |
| Data / restraints / parameters    | 4373 / 354 / 422                                                                                              |
| Goodness-of-fit on F <sup>2</sup> | 1.137                                                                                                         |
| Final R indices [I>2sigma (I)]    | R1 = 0.0550, wR2 = 0.1356                                                                                     |
| R indices (all data)              | R1 = 0.0784, wR2 = 0.1644                                                                                     |



Extinction coefficient

N/A

Largest diff. peak and hole

0.367 and -0.237 e.Å<sup>-3</sup>

### X-ray crystal structure of 3aa.

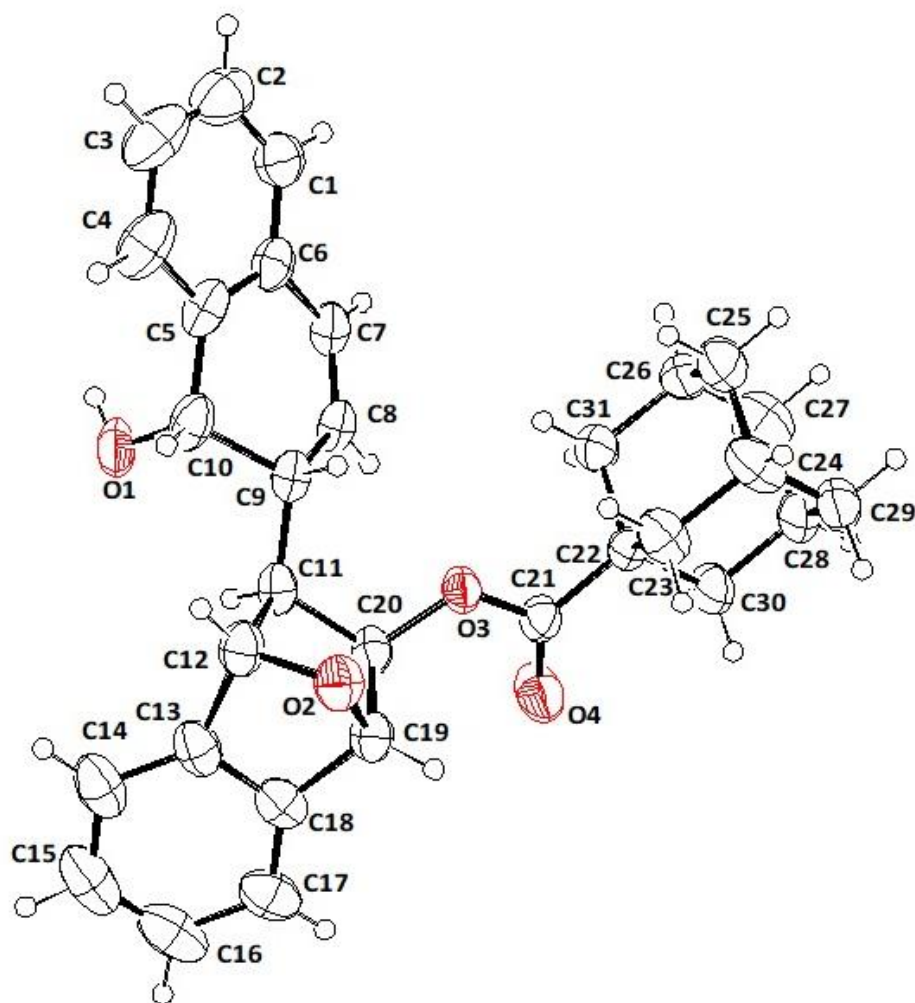

## References:

1. Y. -F. Liang, X. Wang, C. Tang, T. Shen, J. Liu and N. Jiao, *Chem. Commun.* 2016, **52**, 1416.
2. Y. Otani, O. Nagae, Y. Naruse, S. Inagaki, M. Ohno, K. Yamaguchi, G. Yamamoto, M. Uchiyama and T. Ohwada, *J. Am. Chem. Soc.* 2003, **125**, 15191–15199.
3. M. P. Huestis, *J. Org. Chem.* 2016, **81**, 12545

## Spectral Data of All Compounds.

### (2S,3S)-3-((2S)-1-hydroxy-1,2-dihydronaphthalen-2-yl)-1,2,3,4-tetrahydro-1,4-epoxynaphthalen-2-yl adamantane-1-carboxylate (3aa)

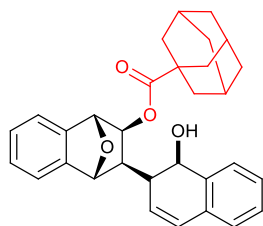

Brown Solid; eluent (5 % ethyl acetate in hexane). The reaction scale is 100 mg (**2a**), 127 mg was isolated, and the yield was 78%. Mp: 161-162 °C. <sup>1</sup>H NMR (400 MHz, CDCl<sub>3</sub>) δ 7.34 (d, *J* = 7.1 Hz, 2H), 7.28 – 7.17 (m, 3H), 7.15 – 7.10 (m, 3H), 6.45 (d, *J* = 9.5 Hz, 1H), 5.61 (s, 1H), 5.45 (d, *J* = 9.6 Hz, 1H), 5.20 – 5.04 (m, 2H), 4.88 (s, 1H), 2.91 (d, *J* = 11.3 Hz, 1H), 2.41 (dd, *J* = 11.4, 7.1 Hz, 1H), 1.91 (s, 3H), 1.82 (s, 6H), 1.64 – 1.59 (m, 6H). <sup>13</sup>C NMR (101 MHz, CDCl<sub>3</sub>) δ 177.8, 147.1, 141.1, 136.1, 132.4, 130.3, 129.1, 128.5, 127.8, 127.7, 127.0, 126.8, 126.5, 120.9, 119.2, 84.8, 80.7, 74.4, 69.6, 44.9, 38.6, 38.3, 36.4, 27.8. HRMS (ESI-QTOF) *m/z*: [M+Na]<sup>+</sup> calcd for C<sub>31</sub>H<sub>32</sub>O<sub>4</sub>Na 491.2193; Found 491.2198.

### (2S,3S)-3-((2S)-1-hydroxy-1,2-dihydronaphthalen-2-yl)-1,2,3,4-tetrahydro-1,4-epoxynaphthalen-2-yl pivalate (3ba)

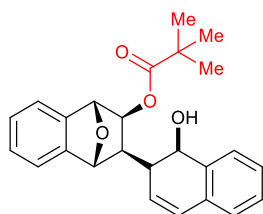

White Solid; eluent (5 % ethyl acetate in hexane). The reaction scale is 100 mg (**2a**), 101 mg was isolated, and the yield was 75%. Mp: 97-98 °C. <sup>1</sup>H NMR (400 MHz, CDCl<sub>3</sub>) δ 7.33 (d, *J* = 7.4 Hz, 2H), 7.29 – 7.20 (m, 3H), 7.16 – 7.05 (m, 3H), 6.44 (dd, *J* = 9.6, 2.6 Hz, 1H), 5.60 (s, 1H), 5.44 (d, *J* = 9.6 Hz, 1H), 5.17 (s, 1H), 5.10 (d, *J* = 7.0 Hz, 1H), 4.87 (d, *J* = 3.7 Hz, 1H), 2.90 (s, 1H), 2.42 (dd, *J* = 11.6, 7.1 Hz, 1H), 1.13 (s, 9H). <sup>13</sup>C NMR (101 MHz, CDCl<sub>3</sub>) δ 178.6, 147.1, 141.0, 136.1, 132.3, 130.2, 129.1, 128.5, 127.9, 127.8, 127.0, 126.8, 126.5, 120.9, 119.3, 84.7, 80.6, 74.8, 69.5, 44.8, 38.3, 27.1. HRMS (ESI-QTOF) *m/z*: [M+Na]<sup>+</sup> calcd for C<sub>25</sub>H<sub>27</sub>O<sub>4</sub>Na 413.1723; Found 413.1726.

### (2S,3S)-3-((2S)-1-hydroxy-1,2-dihydronaphthalen-2-yl)-1,2,3,4-tetrahydro-1,4-epoxynaphthalen-2-yl acetate (3ca)

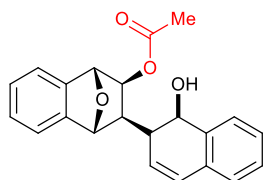

Brown Solid; eluent (5 % ethyl acetate in hexane). The reaction scale is 100 mg (**2a**), 82 mg was isolated, and the yield was 68%. Mp: 170-171 °C. <sup>1</sup>H NMR (400 MHz, CDCl<sub>3</sub>) δ 7.40 (d, *J* = 7.1 Hz, 2H), 7.31 (dd, *J* = 14.1, 8.3 Hz, 3H), 7.24 – 7.12 (m, 3H), 6.52 (dd, *J* = 9.6, 2.5 Hz, 1H), 5.68 (s, 1H), 5.52 (d, *J* = 9.7 Hz, 1H), 5.30 (s, 1H), 5.25 (d, *J* = 7.0 Hz, 1H), 4.93 (s, 1H), 2.96 (d, *J* = 11.8 Hz, 1H), 2.47 (dd, *J* = 11.6, 7.0 Hz, 1H), 2.09 (s, 3H). <sup>13</sup>C NMR (101 MHz, CDCl<sub>3</sub>) δ 171.1, 147.1, 140.8, 129.7, 129.1, 128.4, 127.9, 127.8, 127.0, 126.7, 121.0, 119.2, 84.7, 80.7, 74.7, 69.6, 44.7, 38.4, 21.3. HRMS (ESI-QTOF) *m/z*: [M+Na]<sup>+</sup> calcd for C<sub>22</sub>H<sub>20</sub>O<sub>4</sub>Na 371.1259; Found 371.1254.

**(2S,3S)-3-((2S)-1-hydroxy-1,2-dihydronaphthalen-2-yl)-1,2,3,4-tetrahydro-1,4-epoxynaphthalen-2-yl propionate (3da)**

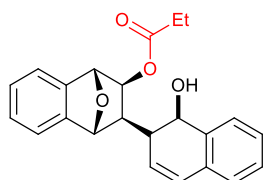

White Solid; eluent (5 % ethyl acetate in hexane). The reaction scale is 100 mg (**2a**), 90 mg was isolated, and the yield was 72%. Mp: 112-113 °C. <sup>1</sup>H NMR (500 MHz, CDCl<sub>3</sub>) δ 7.42 – 7.38 (m, 2H), 7.35 – 7.27 (m, 3H), 7.23 – 7.18 (m, 2H), 7.15 (d, *J* = 7.2 Hz, 1H), 6.52 (dd, *J* = 9.7, 2.8 Hz, 1H), 5.68 (s, 1H), 5.52 (d, *J* = 9.7 Hz, 1H), 5.29 (s, 1H), 5.25 (d, *J* = 7.0 Hz, 1H), 4.93 (s, 1H), 3.01 – 2.93 (m, 1H), 2.48 (dd, *J* = 11.5, 7.0 Hz, 1H), 2.43 – 2.32 (m, 2H), 1.68 (d, *J* = 7.3 Hz, 1H), 1.15 (t, *J* = 7.6 Hz, 3H). <sup>13</sup>C NMR (126 MHz, CDCl<sub>3</sub>) δ 174.4, 147.1, 140.9, 136.1, 132.3, 129.9, 129.1, 128.4, 127.9, 127.8, 127.0, 126.7, 126.7, 120.9, 119.2, 84.7, 80.7, 74.6, 69.6, 44.8, 38.4, 27.9, 9.0. HRMS (ESI-QTOF) *m/z*: [M+Na]<sup>+</sup> calcd for C<sub>23</sub>H<sub>22</sub>O<sub>4</sub>Na 385.1410; Found 385.1411.

**(2S,3S)-3-((2S)-1-hydroxy-1,2-dihydronaphthalen-2-yl)-1,2,3,4-tetrahydro-1,4-epoxynaphthalen-2-yl isobutyrate (3ea)**

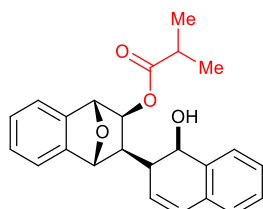

White Solid; eluent (5 % ethyl acetate in hexane). The reaction scale is 100 mg (**2a**), 86 mg was isolated, and the yield was 66%. Mp: 170-171 °C. <sup>1</sup>H NMR (500 MHz, CDCl<sub>3</sub>) δ 7.42 – 7.38 (m, 2H), 7.35 – 7.27 (m, 3H), 7.23 – 7.19 (m, 2H), 7.15 (d, *J* = 6.9 Hz, 1H), 6.52 (dd, *J*

= 9.6, 2.8 Hz, 1H), 5.68 (s, 1H), 5.52 (dt,  $J = 9.6, 1.6$  Hz, 1H), 5.27 (s, 1H), 5.22 (d,  $J = 7.0$  Hz, 1H), 3.03 – 2.95 (m, 1H), 2.58 (dd,  $J = 14.0, 7.0$  Hz, 1H), 2.49 (dd,  $J = 11.6, 7.0$  Hz, 1H), 1.68 (d,  $J = 7.7$  Hz, 1H), 1.17 (dd,  $J = 10.2, 7.0$  Hz, 6H).  $^{13}\text{C}$  NMR (126 MHz,  $\text{CDCl}_3$ )  $\delta$  177.1, 147.1, 140.9, 136.1, 132.3, 130.1, 129.1, 128.5, 127.9, 127.8, 127.0, 126.7, 126.6, 120.9, 119.2, 84.7, 80.6, 74.5, 69.6, 44.8, 38.3, 34.3, 18.9, 18.8. HRMS (ESI-QTOF)  $m/z$ :  $[\text{M}+\text{Na}]^+$  calcd for  $\text{C}_{24}\text{H}_{24}\text{O}_4\text{Na}$  399.1567; Found 399.1566.

**(2S,3S)-3-((1R,2S)-1-hydroxy-1,2-dihydronaphthalen-2-yl)-1,2,3,4-tetrahydro-1,4-epoxynaphthalen-2-yl butyrate (3fa)**

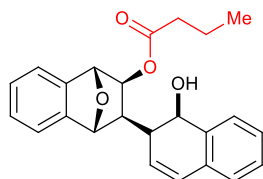

White Solid; eluent (5 % ethyl acetate in hexane). The reaction scale is 100 mg (**2a**), 95 mg was isolated, and the yield was 73%. Mp: 116-117 °C.  $^1\text{H}$  NMR (400 MHz,  $\text{CDCl}_3$ )  $\delta$  7.40 (d,  $J = 7.8$  Hz, 2H), 7.30 (ddd,  $J = 14.6, 7.3, 1.2$  Hz, 3H), 7.22 – 7.18 (m, 2H), 7.15 (d,  $J = 6.8$  Hz, 1H), 6.51 (dd,  $J = 9.6, 2.8$  Hz, 1H), 5.67 (s, 1H), 5.52 (d,  $J = 9.7$  Hz, 1H), 5.29 (s, 1H), 5.24 (d,  $J = 7.0$  Hz, 1H), 4.93 (s, 1H), 3.01 – 2.93 (m, 1H), 2.47 (dd,  $J = 11.5, 7.0$  Hz, 1H), 2.33 (td,  $J = 7.4, 3.9$  Hz, 2H), 1.67 (dt,  $J = 14.8, 7.3$  Hz, 3H), 0.95 (t,  $J = 7.4$  Hz, 3H).  $^{13}\text{C}$  NMR (126 MHz,  $\text{CDCl}_3$ )  $\delta$  173.7, 147.1, 140.9, 136.1, 132.3, 129.9, 129.1, 128.4, 127.9, 127.8, 127.0, 126.7, 120.9, 119.2, 84.7, 80.7, 74.5, 69.6, 44.7, 38.4, 36.4, 18.3, 13.7. HRMS (ESI-QTOF)  $m/z$ :  $[\text{M}+\text{Na}]^+$  calcd for  $\text{C}_{24}\text{H}_{24}\text{O}_4\text{Na}$  399.1567; Found 399.1563.

**(2S,3S)-3-((1R,2S)-1-hydroxy-1,2-dihydronaphthalen-2-yl)-1,2,3,4-tetrahydro-1,4-epoxynaphthalen-2-yl 3-methylbutanoate (3ga)**

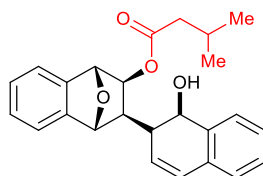

White Solid; eluent (5 % ethyl acetate in hexane). The reaction scale is 100 mg (**2a**), 86 mg was isolated, and the yield was 64%. Mp: 163-164 °C.  $^1\text{H}$  NMR (500 MHz,  $\text{CDCl}_3$ )  $\delta$  7.40 (dd,  $J = 4.5, 2.6$  Hz, 2H), 7.35 – 7.27 (m, 3H), 7.22 – 7.18 (m, 2H), 7.15 (d,  $J = 7.1$  Hz, 1H), 6.51 (dd,  $J = 9.7, 2.8$  Hz, 1H), 5.67 (s, 1H), 5.55 – 5.49 (m, 1H), 5.29 (s, 1H), 5.22 (d,  $J = 7.0$  Hz, 1H), 4.93 (s, 1H), 3.01 – 2.91 (m, 1H), 2.47 (dd,  $J = 11.5, 7.0$  Hz, 1H), 2.27 – 2.20 (m, 2H), 2.12 (dd,  $J = 13.6, 6.8$  Hz, 1H), 1.70 (d,  $J = 6.4$  Hz, 1H), 0.96 (dd,  $J = 6.6, 2.9$  Hz, 6H).  $^{13}\text{C}$  NMR (126 MHz,  $\text{CDCl}_3$ )  $\delta$  173.2, 147.1, 140.9, 136.1, 132.3, 129.9, 129.1, 128.4, 127.9, 127.8, 127.0, 126.7, 126.6, 120.9, 119.2, 84.7, 80.7, 74.5, 69.6, 44.7, 43.6, 38.4, 29.7, 25.7, 22.5, 22.4. HRMS (ESI-QTOF)  $m/z$ :  $[\text{M}+\text{Na}]^+$  calcd for  $\text{C}_{25}\text{H}_{27}\text{O}_4$  391.1904; Found 391.1920.

**(2S,3S)-3-((1R,2S)-1-hydroxy-1,2-dihydronaphthalen-2-yl)-1,2,3,4-tetrahydro-1,4-epoxynaphthalen-2-yl pentanoate (3ha)**

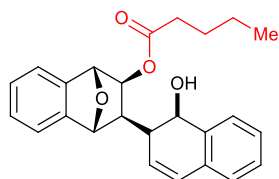

White Solid; eluent (5 % ethyl acetate in hexane). The reaction scale is 100 mg (**2a**), 90 mg was isolated, and the yield was 67%. Mp: 120-121 °C. <sup>1</sup>H NMR (500 MHz, CDCl<sub>3</sub>) δ 7.41 – 7.38 (m, 2H), 7.31 (ddd, *J* = 12.7, 7.8, 4.3 Hz, 3H), 7.20 (dt, *J* = 7.9, 2.4 Hz, 2H), 7.15 (d, *J* = 7.2 Hz, 1H), 6.51 (dd, *J* = 9.6, 2.8 Hz, 1H), 5.67 (s, 1H), 5.52 (d, *J* = 9.6 Hz, 1H), 5.29 (s, 1H), 5.24 (d, *J* = 7.0 Hz, 1H), 4.93 (s, 1H), 3.02 – 2.93 (m, 1H), 2.47 (dd, *J* = 11.5, 7.0 Hz, 1H), 2.34 (td, *J* = 7.5, 4.7 Hz, 2H), 1.65 – 1.59 (m, 3H), 1.34 (d, *J* = 7.9 Hz, 2H), 0.89 (t, *J* = 7.4 Hz, 3H). <sup>13</sup>C NMR (126 MHz, CDCl<sub>3</sub>) δ 173.8, 147.1, 140.9, 136.1, 132.3, 129.9, 129.1, 128.4, 127.9, 127.8, 127.0, 126.7, 126.7, 120.9, 119.2, 84.7, 80.7, 74.5, 69.6, 44.7, 38.4, 34.3, 26.8, 22.2, 13.7. HRMS (ESI-QTOF) *m/z*: [M+Na]<sup>+</sup> calcd for C<sub>25</sub>H<sub>26</sub>O<sub>4</sub>Na 413.1723; Found 413.1725.

**(2S,3S)-3-((1R,2S)-hydroxy-1,2-dihydronaphthalen-2-yl)-1,2,3,4-tetrahydro-1,4-epoxynaphthalen-2-yl hexanoate (3ia)**

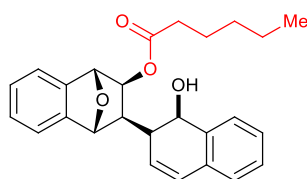

White Solid; eluent (5 % ethyl acetate in hexane). The reaction scale is 100 mg (**2a**), 105 mg was isolated, and the yield was 75%. Mp: 128-129 °C. <sup>1</sup>H NMR (500 MHz, CDCl<sub>3</sub>) δ 7.40 (d, *J* = 8.0 Hz, 2H), 7.35 – 7.27 (m, 3H), 7.22 – 7.18 (m, 2H), 7.15 (d, *J* = 7.2 Hz, 1H), 6.51 (dd, *J* = 9.6, 2.8 Hz, 1H), 5.68 (s, 1H), 5.52 (d, *J* = 9.6 Hz, 1H), 5.29 (s, 1H), 5.24 (d, *J* = 7.0 Hz, 1H), 4.93 (s, 1H), 3.01 – 2.91 (m, 1H), 2.47 (dd, *J* = 11.5, 7.0 Hz, 1H), 2.34 (td, *J* = 7.5, 5.0 Hz, 2H), 1.71 (s, 1H), 1.32 – 1.27 (m, 4H), 0.87 (t, *J* = 7.0 Hz, 3H). <sup>13</sup>C NMR (126 MHz, CDCl<sub>3</sub>) δ 173.9, 147.1, 140.9, 136.0, 132.3, 129.9, 129.1, 128.4, 127.9, 127.8, 127.0, 126.7, 126.7, 120.9, 119.2, 84.7, 80.6, 74.5, 69.6, 44.7, 38.4, 34.5, 31.3, 24.5, 22.3, 14.2, 13.8. HRMS (ESI-QTOF) *m/z*: [M+Na]<sup>+</sup> calcd for C<sub>26</sub>H<sub>28</sub>O<sub>4</sub>Na 427.1880; Found 427.1881.

**(2S,3S)-3-((1R,2S)-1-hydroxy-1,2-dihydronaphthalen-2-yl)-1,2,3,4-tetrahydro-1,4-epoxynaphthalen-2-yl 3-chloropropanoate (3ja)**

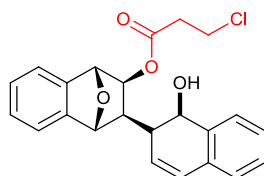

White Solid; eluent (5 % ethyl acetate in hexane). The reaction scale is 100 mg (**2a**), 79 mg was isolated, and the yield was 58%. Mp: 124-125 °C. <sup>1</sup>H NMR (500 MHz, CDCl<sub>3</sub>) δ 7.40 (dd, *J* = 4.7, 2.6 Hz, 2H), 7.34 – 7.28 (m, 3H), 7.21 (dt, *J* = 8.1, 2.4 Hz, 2H), 7.16 (d, *J* = 6.8 Hz, 1H), 6.53 (dd, *J* = 9.7, 2.8 Hz, 1H), 5.68 (s, 1H), 5.53 (d, *J* = 9.7 Hz, 1H), 5.33 – 5.28 (m, 2H), 4.93 (d, *J* = 3.7 Hz, 1H), 3.75 (dd, *J* = 9.5, 3.6 Hz, 2H), 2.98 – 2.93 (m, 1H), 2.86 – 2.81 (m, 2H), 2.50 (dd, *J* = 11.6, 7.0 Hz, 1H). <sup>13</sup>C NMR (126 MHz, CDCl<sub>3</sub>) δ 170.3, 147.0, 140.6, 136.0, 132.2, 129.5, 129.1, 128.4, 127.9, 127.9, 127.8, 127.0, 126.9, 126.8, 121.0, 119.3, 84.6, 80.7, 75.4, 69.5, 44.7, 38.8, 38.4, 37.8. HRMS (ESI-QTOF) *m/z*: [M+Na]<sup>+</sup> calcd for C<sub>23</sub>H<sub>21</sub>ClO<sub>4</sub>Na 419.1021; Found 419.1008.

**(2S,3S)-3-((2S)-1-hydroxy-1,2,4a,8a-tetrahydronaphthalen-2-yl)-1,2,3,4-tetrahydro-1,4-epoxynaphthalen-2-yl benzoate (3ka)**

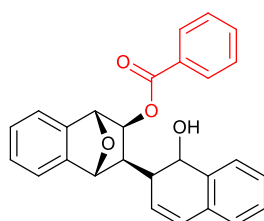

Brown Solid; eluent (5 % ethyl acetate in hexane). The reaction scale is 100 mg (**2a**), 112 mg was isolated, and the yield was 78%. Mp: 122-123 °C. <sup>1</sup>H NMR (500 MHz, CDCl<sub>3</sub>) δ 8.12 – 8.10 (m, 1H), 8.01 (dd, *J* = 8.3, 1.2 Hz, 2H), 7.54 (d, *J* = 7.4 Hz, 1H), 7.47 – 7.38 (m, 5H), 7.36 – 7.29 (m, 3H), 7.24 – 7.21 (m, 2H), 7.14 (d, *J* = 7.2 Hz, 1H), 6.49 (dd, *J* = 9.7, 2.8 Hz, 1H), 5.75 (s, 1H), 5.64 (dd, *J* = 9.6, 1.6 Hz, 1H), 5.48 – 5.40 (m, 2H), 5.07 – 4.97 (m, 1H), 3.22 – 3.12 (m, 1H), 2.61 (dd, *J* = 11.5, 7.0 Hz, 1H). <sup>13</sup>C NMR (126 MHz, CDCl<sub>3</sub>) δ 166.6, 147.1, 141.0, 136.1, 133.6, 133.3, 132.4, 130.2, 129.8, 129.7, 129.1, 128.5, 128.5, 128.4, 127.9, 127.8, 127.0, 126.9, 126.8, 121.0, 119.3, 84.8, 80.8, 75.7, 69.7, 44.9, 38.6. HRMS (ESI-QTOF) *m/z*: [M+H]<sup>+</sup> calcd for C<sub>27</sub>H<sub>24</sub>O<sub>4</sub> 433.1410; Found 433.1417.

**(2S,3S)-3-((2R)-1-hydroxy-1,2,4a,8a-tetrahydronaphthalen-2-yl)-1,2,3,4-tetrahydro-1,4-epoxynaphthalen-2-yl 4-methylbenzoate (3la)**

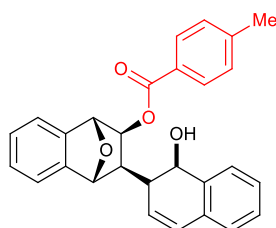

Brown Solid; eluent (5 % ethyl acetate in hexane). The reaction scale is 100 mg (**2a**), 96 mg was isolated, and the yield was 65%. Mp: 130-131 °C. <sup>1</sup>H NMR (400 MHz, CDCl<sub>3</sub>) δ 7.86 (s, 1H), 7.82 (d, *J* = 7.7 Hz, 1H), 7.50 – 7.42 (m, 2H), 7.38 (t, *J* = 6.5 Hz, 2H), 7.35 – 7.31 (m, 2H), 7.28 – 7.22 (m, 2H), 7.16 (d, *J* = 7.1 Hz, 1H), 6.52 (dd, *J* = 9.7, 2.7 Hz, 1H), 5.77 (s, 1H), 5.68 (d, *J* = 9.7 Hz, 1H), 5.51 – 5.42 (m, 2H), 5.04 (d, *J* = 4.2 Hz, 1H), 3.19 (d, *J* = 11.3 Hz, 1H), 2.63 (dd, *J* = 11.4, 7.1 Hz, 1H), 2.38 (s, 3H). <sup>13</sup>C NMR (126 MHz, CDCl<sub>3</sub>) δ 166.8,

147.0, 141.0, 138.3, 136.1, 134.1, 132.3, 130.3, 129.9, 129.7, 129.1, 128.4, 127.9, 127.8, 127.0, 126.9, 126.7, 121.0, 119.3, 84.8, 80.8, 75.6, 69.7, 44.8, 38.7, 21.2. HRMS (ESI-QTOF)  $m/z$ :  $[M+Na]^+$  calcd for  $C_{28}H_{26}O_4Na$  447.1567; Found 447.1566.

**(2S,3S)-3-((2S)-1-hydroxy-1,2,4a,8a-tetrahydronaphthalen-2-yl)-1,2,3,4-tetrahydro-1,4-epoxynaphthalen-2-yl 3,4,5-trimethylbenzoate (3ma)**

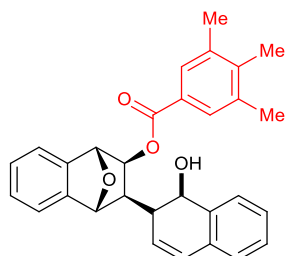

Brown Solid; eluent (5 % ethyl acetate in hexane). The reaction scale is 100 mg (**2a**), 91 mg was isolated, and the yield was 58%. Mp: 92-93 °C.  $^1H$  NMR (400 MHz,  $CDCl_3$ )  $\delta$  7.65 (s, 2H), 7.61 (s, 1H), 7.56 (s, 1H), 7.37 (dd,  $J = 12.2, 5.6$  Hz, 2H), 7.26 (dd,  $J = 10.6, 6.6$  Hz, 2H), 7.15 (d,  $J = 7.6$  Hz, 2H), 7.10 (s, 1H), 7.06 (d,  $J = 7.1$  Hz, 1H), 6.42 (d,  $J = 9.7$  Hz, 1H), 5.69 (s, 1H), 5.60 (d,  $J = 9.7$  Hz, 1H), 5.36 (d,  $J = 7.1$  Hz, 2H), 4.95 (d,  $J = 4.2$  Hz, 1H), 3.83 – 3.67 (m, 1H), 3.08 (d,  $J = 10.4$  Hz, 1H), 2.53 (dd,  $J = 11.2, 7.1$  Hz, 1H), 2.30 (s, 9H), 2.23 (s, 6H).  $^{13}C$  NMR (126 MHz,  $CDCl_3$ )  $\delta$  171.5, 166.9, 147.0, 141.1, 138.2, 135.4, 130.0, 129.1, 128.4, 127.9, 127.5, 127.1, 126.9, 126.7, 121.0, 119.3, 84.8, 80.9, 75.5, 45.0, 38.8, 21.1. HRMS (ESI-QTOF)  $m/z$ :  $[M+Na]^+$  calcd for  $C_{30}H_{30}O_4Na$  475.1880; Found 475.1880.

**(2S,3S)-3-((2S)-1-hydroxy-1,2,4a,8a-tetrahydronaphthalen-2-yl)-1,2,3,4-tetrahydro-1,4-epoxynaphthalen-2-yl 4-nitrobenzoate (3na)**

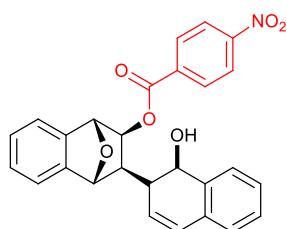

Half White Solid; eluent (5 % ethyl acetate in hexane). The reaction scale is 100 mg (**2a**), 123 mg was isolated, and the yield was 78%. 190-191 °C.  $^1H$  NMR (500 MHz,  $CDCl_3$ )  $\delta$  8.25 (d,  $J = 8.8$  Hz, 2H), 8.17 (d,  $J = 8.8$  Hz, 2H), 7.48 – 7.42 (m, 2H), 7.37 – 7.29 (m, 3H), 7.25 (dd,  $J = 5.3, 2.9$  Hz, 2H), 7.15 (d,  $J = 7.2$  Hz, 1H), 6.49 (dd,  $J = 9.7, 2.6$  Hz, 1H), 5.75 (s, 1H), 5.59 (d,  $J = 9.6$  Hz, 1H), 5.46 (d,  $J = 5.8$  Hz, 2H), 5.00 (s, 1H), 3.21 – 3.04 (m, 1H), 2.64 (dd,  $J = 11.6, 7.0$  Hz, 1H).  $^{13}C$  NMR (126 MHz,  $CDCl_3$ )  $\delta$  164.7, 150.7, 147.0, 140.6, 136.0, 135.2, 132.2, 130.8, 129.2, 128.4, 128.1, 128.0, 127.2, 127.2, 126.9, 123.7, 121.0, 119.4, 84.6, 80.8, 69.5, 45.0, 38.6. HRMS (ESI-QTOF)  $m/z$ :  $[M+Na]^+$  calcd for  $C_{27}H_{23}NO_6Na$  478.1261; Found 478.1252.



**(2S,3S)-3-((2S)-1-hydroxy-1,2,4a,8a-tetrahydronaphthalen-2-yl)-1,2,3,4-tetrahydro-1,4-epoxynaphthalen-2-yl 4-acetylbenzoate (30a)**

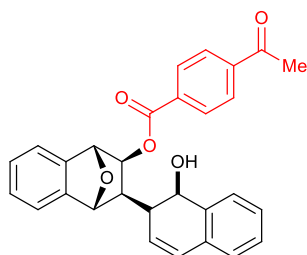

Brown Solid; eluent (5 % ethyl acetate in hexane). The reaction scale is 100 mg (**2a**), 116 mg was isolated, and the yield was 74%. Mp: 108-109 °C. <sup>1</sup>H NMR (400 MHz, CDCl<sub>3</sub>) δ 8.09 (d, *J* = 8.1 Hz, 2H), 7.97 (d, *J* = 7.8 Hz, 2H), 7.56 – 7.39 (m, 3H), 7.38 – 7.30 (m, 3H), 7.25 – 7.21 (m, 2H), 7.15 (d, *J* = 7.1 Hz, 1H), 6.49 (d, *J* = 9.6 Hz, 1H), 5.76 (s, 1H), 5.62 (d, *J* = 9.7 Hz, 1H), 5.45 (d, *J* = 10.2 Hz, 2H), 5.02 (d, *J* = 4.2 Hz, 1H), 3.16 (d, *J* = 11.6 Hz, 1H), 2.62 (s, 3H). <sup>13</sup>C NMR (126 MHz, CDCl<sub>3</sub>) δ 197.4, 165.7, 147.0, 140.8, 140.5, 136.1, 133.6, 132.3, 130.4, 129.9, 129.5, 129.2, 128.4, 128.3, 128.3, 128.0, 127.9, 127.1, 127.0, 126.8, 121.0, 119.4, 84.7, 80.8, 76.2, 69.6, 44.9, 38.6, 26.8. HRMS (ESI-QTOF) *m/z*: [M+Na]<sup>+</sup> calcd for C<sub>29</sub>H<sub>26</sub>O<sub>5</sub>Na 475.1516; Found 475.1516.

**(2S,3S)-3-((2S)-1-hydroxy-1,2,4a,8a-tetrahydronaphthalen-2-yl)-1,2,3,4-tetrahydro-1,4-epoxynaphthalen-2-yl 2-naphthoate (3pa)**

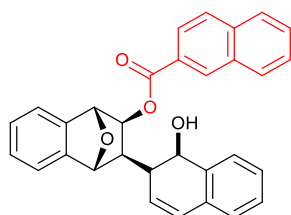

Brown Solid; eluent (5 % ethyl acetate in hexane). The reaction scale is 100 mg (**2a**), 111 mg was isolated, and the yield was 70%. Mp: 128-129 °C. <sup>1</sup>H NMR (400 MHz, CDCl<sub>3</sub>) δ 8.99 (s, 2H), 8.32 (d, *J* = 7.3 Hz, 2H), 8.10 (d, *J* = 7.4 Hz, 1H), 8.02 (d, *J* = 8.2 Hz, 2H), 7.94 (d, *J* = 8.1 Hz, 1H), 7.85 (d, *J* = 8.1 Hz, 2H), 7.57 – 7.50 (m, 2H), 7.34 (d, *J* = 5.1 Hz, 2H), 7.05 (d, *J* = 7.2 Hz, 1H), 6.42 (dd, *J* = 9.7, 2.3 Hz, 1H), 5.71 (s, 1H), 5.64 (d, *J* = 9.6 Hz, 1H), 5.50 – 5.46 (m, 2H), 4.96 (d, *J* = 4.3 Hz, 1H), 3.11 (d, *J* = 11.6 Hz, 1H), 2.58 (dd, *J* = 11.5, 7.1 Hz, 1H). <sup>13</sup>C NMR (126 MHz, CDCl<sub>3</sub>) δ 170.9, 166.8, 147.1, 141.0, 136.2, 135.9, 135.7, 132.4, 132.4, 132.1, 131.5, 129.9, 129.5, 129.4, 129.1, 128.6, 128.4, 128.3, 128.3, 127.9, 127.8, 127.8, 127.7, 127.1, 127.0, 126.8, 126.7, 126.5, 125.4, 125.1, 121.0, 119.3, 84.8, 83.5, 80.9, 76.5, 75.8, 69.7, 45.0, 38.8. HRMS (ESI-QTOF) *m/z*: [M+Na]<sup>+</sup> calcd for C<sub>28</sub>H<sub>26</sub>O<sub>5</sub>Na 483.1567; Found 483.1570.

**(2S,3S)-3-((2S)-1-hydroxy-1,2,4a,8a-tetrahydronaphthalen-2-yl)-1,2,3,4-tetrahydro-1,4-epoxynaphthalen-2-yl furan-2-carboxylate (3qa)**

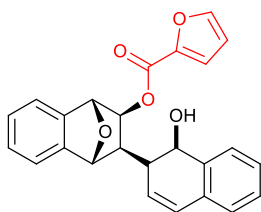

Brown Solid; eluent (5 % ethyl acetate in hexane). The reaction scale is 100 mg (**2a**), 112 mg was isolated, and the yield was 81%. Mp: 128-129 °C. <sup>1</sup>H NMR (400 MHz, CDCl<sub>3</sub>) δ 7.51 (s, 1H), 7.35 (d, *J* = 8.4 Hz, 2H), 7.30 – 7.15 (m, 5H), 7.07 (d, *J* = 11.5 Hz, 2H), 6.42 (d, *J* = 12.5 Hz, 2H), 5.66 (s, 1H), 5.56 (d, *J* = 9.7 Hz, 1H), 5.37 (s, 1H), 5.33 (d, *J* = 6.6 Hz, 1H), 4.93 (s, 1H), 3.02 (d, *J* = 11.1 Hz, 1H), 2.56 – 2.45 (m, 1H). <sup>13</sup>C NMR (101 MHz, CDCl<sub>3</sub>) δ 158.5, 153.5, 147.0, 146.9, 140.8, 136.1, 132.3, 129.8, 129.0, 128.4, 127.9, 127.7, 126.8, 126.7, 121.0, 119.3, 118.6, 111.9, 84.6, 80.8, 75.5, 69.7, 44.9, 38.6. HRMS (ESI-QTOF) *m/z*: [M+H]<sup>+</sup> calcd for C<sub>29</sub>H<sub>20</sub>O<sub>5</sub> 423.1203; Found 423.1196.

**(2S,3S)-3-((2S)-1-hydroxy-1,2,4a,8a-tetrahydronaphthalen-2-yl)-1,2,3,4-tetrahydro-1,4-epoxynaphthalen-2-yl thiophene-3-carboxylate (3ra)**

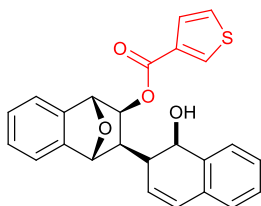

Brown Solid; eluent (5 % ethyl acetate in hexane). The reaction scale is 100 mg (**2a**), 107 mg was isolated, and the yield was 74%. Mp: 119-120 °C. <sup>1</sup>H NMR (500 MHz, CDCl<sub>3</sub>) δ 8.01 (dd, *J* = 3.0, 1.1 Hz, 1H), 7.43 (dd, *J* = 5.1, 1.0 Hz, 1H), 7.39 – 7.35 (m, 2H), 7.29 – 7.25 (m, 2H), 7.24 – 7.20 (m, 2H), 7.17 – 7.13 (m, 2H), 7.09 (d, *J* = 6.9 Hz, 1H), 6.44 (dd, *J* = 9.7, 2.8 Hz, 1H), 5.66 (s, 1H), 5.58 (d, *J* = 9.7 Hz, 1H), 5.38 (s, 1H), 5.28 (d, *J* = 7.0 Hz, 1H), 4.93 (d, *J* = 3.9 Hz, 1H), 3.05 (s, 1H), 2.52 (dd, *J* = 11.5, 7.1 Hz, 1H). <sup>13</sup>C NMR (126 MHz, CDCl<sub>3</sub>) δ 162.6, 146.9, 140.9, 136.1, 133.4, 133.2, 132.3, 129.9, 129.1, 128.4, 127.9, 127.9, 127.8, 127.4, 127.1, 126.8, 126.8, 126.3, 121.0, 119.3, 84.7, 80.8, 75.5, 69.6, 44.6, 38.7. HRMS (ESI-QTOF) *m/z*: [M+NH<sub>4</sub>]<sup>+</sup> calcd for C<sub>25</sub>H<sub>26</sub>O<sub>4</sub>NS 434.1421; Found 434.1411.

**(2S,3S)-3-((2S)-1-hydroxy-6,7-dimethyl-1,2,4a,8a-tetrahydronaphthalen-2-yl)-6,7-dimethyl-1,2,3,4-tetrahydro-1,4-epoxynaphthalen-2-yl 4-methylbenzoate (3lb)**

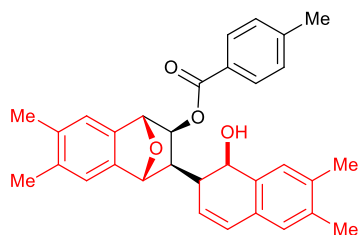

Brown Solid; eluent (5 % ethyl acetate in hexane). The reaction scale is 100 mg (**2b**), 77 mg was isolated, and the yield was 55%. Mp: 100-101 °C.  $^1\text{H}$  NMR (400 MHz,  $\text{CDCl}_3$ )  $\delta$  7.84 (d,  $J = 8.7$  Hz, 3H), 7.76 (s, 1H), 7.70 (d,  $J = 7.7$  Hz, 1H), 7.36 (s, 1H), 7.28 (t,  $J = 7.6$  Hz, 1H), 7.12 (s, 1H), 7.06 (s, 1H), 6.84 (s, 1H), 6.35 (dd,  $J = 9.7, 2.8$  Hz, 1H), 5.60 (s, 1H), 5.48 (d,  $J = 9.5$  Hz, 1H), 5.31 (d,  $J = 7.0$  Hz, 2H), 4.87 (d,  $J = 4.1$  Hz, 1H), 3.03 (d,  $J = 11.1$  Hz, 1H), 2.48 (dd,  $J = 11.4, 7.0$  Hz, 1H), 2.35 (s, 3H), 2.27 (s, 3H), 2.22 (s, 3H), 2.20 – 2.15 (m, 9H).  $^{13}\text{C}$  NMR (126 MHz,  $\text{CDCl}_3$ )  $\delta$  167.3, 145.0, 140.8, 138.7, 137.3, 136.3, 135.9, 135.1, 133.8, 132.2, 131.9, 131.7, 130.8, 130.0, 129.8, 128.9, 128.0, 126.6, 125.8, 125.8, 122.2, 120.6, 84.8, 80.7, 75.69, 69.4, 45.4, 38.9, 21.9, 20.0, 19.9, 19.6, 19.5. HRMS (ESI-QTOF)  $m/z$ :  $[\text{M} + \text{Na}]^+$  calcd for  $\text{C}_{32}\text{H}_{32}\text{O}_4\text{Na}$  503.2193; Found 503.2190.

**(2S,3S)-3-((2S)-1-hydroxy-6,7-dimethyl-1,2,4a,8a-tetrahydronaphthalen-2-yl)-6,7-dimethyl-1,2,3,4-tetrahydro-1,4-epoxynaphthalen-2-yl 4-nitrobenzoate (3nb)**

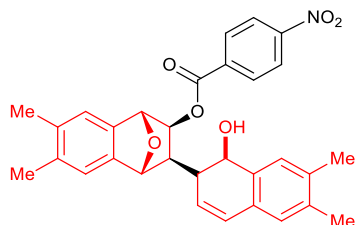

Brown Solid; eluent (5 % ethyl acetate in hexane). The reaction scale is 100 mg (**2b**), 101 mg was isolated, and the yield was 68%. Mp: 141-142 °C.  $^1\text{H}$  NMR (500 MHz,  $\text{CDCl}_3$ )  $\delta$  8.24 (d,  $J = 8.7$  Hz, 2H), 8.15 (d,  $J = 8.7$  Hz, 2H), 7.24 (s, 1H), 7.21 (s, 1H), 7.15 (s, 1H), 6.94 (s, 1H), 6.43 (dd,  $J = 9.6, 2.6$  Hz, 1H), 5.67 (s, 1H), 5.49 (d,  $J = 9.6$  Hz, 1H), 5.42 (d,  $J = 6.9$  Hz, 1H), 5.39 (s, 1H), 4.92 (s, 1H), 3.08 (d,  $J = 11.5$  Hz, 1H), 2.60 (dd,  $J = 11.7, 6.9$  Hz, 1H), 2.31 (s, 3H), 2.30 – 2.26 (m, 9H).  $^{13}\text{C}$  NMR (126 MHz,  $\text{CDCl}_3$ )  $\delta$  164.7, 150.7, 144.8, 138.3, 137.6, 136.6, 136.3, 135.3, 133.7, 130.8, 129.8, 129.8, 128.3, 128.2, 127.0, 123.6, 122.3, 120.7, 84.5, 80.7, 69.3, 45.5, 38.9, 20.0, 19.9, 19.6, 19.5. HRMS (ESI-QTOF)  $m/z$ :  $[\text{M} + \text{Na}]^+$  calcd for  $\text{C}_{31}\text{H}_{29}\text{NO}_6\text{Na}$  534.1887; Found 534.1883.

**(2S,3S)-3-((2S)-1-Hydroxy-6,7-dimethyl-1,2,4a,8a-tetrahydronaphthalen-2-yl)-6,7-dimethyl-1,2,3,4-tetrahydro-1,4-epoxynaphthalen-2-yl furan-3-carboxylate (3rb)**

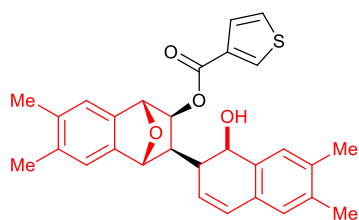

Brown Solid; eluent (5 % ethyl acetate in hexane). The reaction scale is 100 mg (**2b**), 93 mg was isolated, and the yield was 68%. Mp: 104-103 °C. <sup>1</sup>H NMR (400 MHz, CDCl<sub>3</sub>) δ 7.75 (d, *J* = 3.5 Hz, 1H), 7.52 (d, *J* = 4.9 Hz, 1H), 7.21 – 7.19, 2H, 7.12 (s, 1H), 7.08 – 7.03 (m, 1H), 6.93 (s, 1H), 6.44 (d, *J* = 2.6 Hz, 1H), 5.65 (s, 1H), 5.54 (d, *J* = 9.6 Hz, 1H), 5.39 (s, 1H), 5.32 (d, *J* = 7.0 Hz, 1H), 4.92 (s, 1H), 3.07 (d, *J* = 11.6 Hz, 1H), 2.53 (dd, *J* = 11.5, 7.0 Hz, 1H), 2.30 (s, 3H), 2.26 (d, *J* = 5.3 Hz, 9H). <sup>13</sup>C NMR (126 MHz, CDCl<sub>3</sub>) δ 162.2, 144.9, 138.6, 137.3, 136.2, 136.0, 135.1, 133.8, 133.8, 133.5, 132.9, 130.0, 129.8, 128.9, 128.0, 127.8, 126.6, 122.3, 120.6, 84.5, 80.7, 76.2, 69.5, 45.3, 38.9, 20.1, 20.0, 19.9, 19.6, 19.5. HRMS (ESI-QTOF) *m/z*: [M+K]<sup>+</sup> calcd for C<sub>29</sub>H<sub>28</sub>O<sub>4</sub>SK 511.1340; Found 511.1343.

**(2S,3S)-3-((2S)-1-hydroxy-6,7-dimethoxy-1,2-dihydronaphthalen-2-yl)-6,7-dimethoxy-1,2,3,4-tetrahydro-1,4-epoxynaphthalen-2-yl furan-2-carboxylate (3qc)**

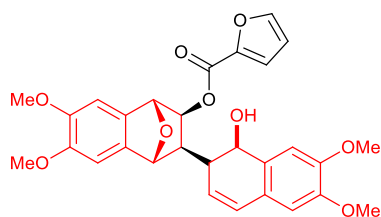

Brown Solid; eluent (5 % ethyl acetate in hexane). The reaction scale is 100 mg (**2c**), 91 mg was isolated, and the yield was 71%. Mp: 110-111 °C. <sup>1</sup>H NMR (400 MHz, CDCl<sub>3</sub>) δ 7.69 (s, 1H), 7.63 (d, *J* = 0.7 Hz, 1H), 7.58 (d, *J* = 8.4 Hz, 1H), 7.42 (d, *J* = 8.4 Hz, 1H), 7.34 (s, 1H), 7.31 (d, *J* = 3.5 Hz, 1H), 7.08 (d, *J* = 2.5 Hz, 2H), 7.05 (s, 1H), 6.93 (s, 1H), 6.55 (dd, *J* = 3.5, 1.7 Hz, 1H), 6.45 (d, *J* = 3.2 Hz, 1H), 6.18 (dd, *J* = 3.4, 1.7 Hz, 1H), 5.50 (s, 2H), 5.34 (d, *J* = 7.0 Hz, 1H), 3.98 (d, *J* = 1.9 Hz, 6H), 3.91 (d, *J* = 11.0 Hz, 6H), 3.44 (d, *J* = 7.0 Hz, 1H). <sup>13</sup>C NMR (101 MHz, CDCl<sub>3</sub>) δ 158.1, 149.4, 148.3, 147.2, 146.3, 143.9, 139.3, 133.9, 133.6, 128.8, 128.0, 126.9, 126.2, 125.7, 119.8, 117.8, 112.2, 111.4, 106.2, 105.9, 105.5, 103.2, 85.4, 83.4, 76.7, 76.4, 56.4, 56.3, 55.8, 51.4. HRMS (ESI-QTOF) *m/z*: [M+K]<sup>+</sup> calcd for C<sub>29</sub>H<sub>28</sub>O<sub>9</sub>K 559.1265; Found 559.1282.

**(2S,3S)-3-((2S)-1-hydroxy-6,7-dimethoxy-1,2-dihydronaphthalen-2-yl)-6,7-dimethoxy-1,2,3,4-tetrahydro-1,4-epoxynaphthalen-2-yl thiophene-2-carboxylate (3rc)**

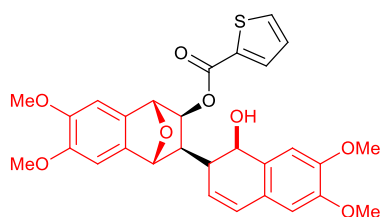

Brown Solid; eluent (5 % ethyl acetate in hexane). The reaction scale is 100 mg (**2c**), 74 mg was isolated, and the yield was 56%. Mp: 106-107 °C. <sup>1</sup>H NMR (500 MHz, CDCl<sub>3</sub>) δ 7.72 (s, 1H), 7.60 (d, *J* = 8.4 Hz, 1H), 7.44 (d, *J* = 1.5 Hz, 1H), 7.31 (dd, *J* = 5.0, 1.1 Hz, 1H), 7.27 (dd, *J* = 3.8, 1.3 Hz, 1H), 7.09 (d, *J* = 6.2 Hz, 2H), 7.06 (s, 1H), 6.93 (s, 1H), 6.81 (dd, *J* = 4.9, 3.8 Hz, 1H), 5.50 (d, *J* = 4.6 Hz, 2H), 5.31 (d, *J* = 7.1 Hz, 1H), 3.98 (d, *J* = 2.7 Hz, 6H), 3.93 (s, 3H), 3.91 (s, 3H), 3.44 (d, *J* = 7.1 Hz, 1H). <sup>13</sup>C NMR (126 MHz, CDCl<sub>3</sub>) δ 161.8, 149.4, 149.2, 148.9, 148.4, 139.3, 134.1, 133.8, 133.3, 133.1, 132.5, 129.0, 128.1, 127.3, 127.0, 126.2, 125.9, 106.3, 106.0, 105.5, 103.9, 85.4, 83.5, 56.4, 56.3, 55.8, 55.8, 51.3. HRMS (ESI-QTOF) *m/z*: [M+Na]<sup>+</sup> calcd for C<sub>29</sub>H<sub>28</sub>NO<sub>8</sub>SNa 599.1397; Found 599.1399.

**(2S,3S)-3-((2S)-1-hydroxy-6,7-dimethoxy-1,2-dihydronaphthalen-2-yl)-6,7-dimethoxy-1,2,3,4-tetrahydro-1,4-epoxynaphthalen-2-yl 4-methylbenzoate (3lc)**

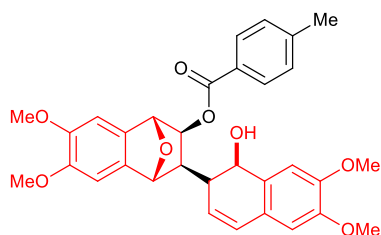

Brown Solid; eluent (5 % ethyl acetate in hexane). The reaction scale is 100 mg (**2c**), 77 mg was isolated, and the yield was 58%. Mp: 131-132 °C. <sup>1</sup>H NMR (400 MHz, CDCl<sub>3</sub>) δ 7.80 (s, 1H), 7.61 (d, *J* = 8.4 Hz, 1H), 7.39 (dd, *J* = 19.8, 8.1 Hz, 2H), 7.10 (dd, *J* = 13.8, 8.3 Hz, 4H), 7.05 – 6.99 (m, 2H), 6.95 (s, 1H), 5.58 (s, 1H), 5.50 (s, 1H), 5.32 (d, *J* = 7.1 Hz, 1H), 4.13 – 4.11 (m, 1H), 3.98 (d, *J* = 1.7 Hz, 6H), 3.95 – 3.90 (m, 6H), 3.47 (d, *J* = 7.1 Hz, 1H), 2.04 (s, 1H), 1.99 (s, 3H). <sup>13</sup>C NMR (101 MHz, CDCl<sub>3</sub>) δ 166.4, 149.4, 149.2, 148.8, 148.3, 139.2, 137.6, 134.1, 134.1, 133.4, 129.9, 129.5, 129.0, 128.0, 127.8, 126.6, 126.4, 126.3, 125.9, 106.2, 106.0, 105.5, 103.8, 85.1, 83.5, 76.4, 56.3, 55.8, 55.8, 51.1, 20.7. HRMS (ESI-QTOF) *m/z*: [M]<sup>+</sup> calcd for C<sub>32</sub>H<sub>32</sub>O<sub>8</sub> 544.2097; Found 544.2046.

**(6S,7S)-7-((6S)-5-hydroxy-4a,5,6,8a-tetrahydronaphtho[2,3-d][1,3]dioxol-6-yl)-5,6,7,8-tetrahydro-5,8-epoxynaphtho[2,3-d][1,3]dioxol-6-yl furan-2-carboxylate (3qd)**

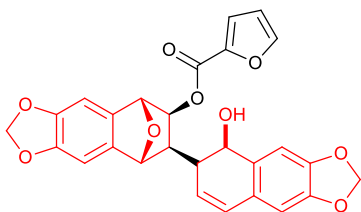

Brown Solid; eluent (5 % ethyl acetate in hexane). The reaction scale is 100 mg (**2d**), 94 mg was isolated, and the yield was 72%. Mp: 148-149 °C. <sup>1</sup>H NMR (400 MHz, CDCl<sub>3</sub>) δ 8.25 (d, *J* = 8.7 Hz, 15H), <sup>1</sup>H NMR (400 MHz, CDCl<sub>3</sub>) δ 7.66 (s, 1H), 7.27 (d, *J* = 3.4 Hz, 1H), 7.05 (s, 1H), 6.73 (s, 1H), 6.59 (dd, *J* = 4.8, 3.1 Hz, 2H), 6.47 (s, 1H), 5.99 (d, *J* = 4.7 Hz, 2H), 5.86 (d, *J* = 8.8 Hz, 2H), 5.73 (d, *J* = 3.2 Hz, 2H), 5.66 (s, 1H), 5.49 (s, 1H), 5.31 (s, 1H), 5.08 (s, 1H), 4.62 (d, *J* = 19.0 Hz, 1H), 3.14 (d, *J* = 8.8 Hz, 1H), 2.33 (dd, *J* = 8.8, 4.3 Hz, 1H), 1.97 (s, 1H), 1.85 – 1.78 (m, 1H). <sup>13</sup>C NMR (126 MHz, CDCl<sub>3</sub>) δ 169.6, 147.2, 146.9, 145.8, 142.0, 141.0, 140.8, 138.7, 133.4, 132.2, 131.6, 131.4, 130.6, 129.9, 128.4, 128.3, 127.9, 127.7, 127.5, 127.4, 127.1, 126.5, 126.4, 126.1, 125.8, 120.5, 119.2, 119.1, 118.2, 84.0, 82.5, 80.9, 80.0, 48.8, 44.2, 43.5, 29.7. HRMS (ESI-QTOF) *m/z*: [M+K]<sup>+</sup> calcd for C<sub>27</sub>H<sub>20</sub>O<sub>9</sub>K 527.0739; Found 527.0735.

**(6S,7S)-7-((6S)-5-hydroxy-2,3,4a,5,6,8a-hexahydro-1H-cyclopenta[b]naphthalen-6-yl)-2,3,5,6,7,8-hexahydro-1H-5,8-epoxycyclopenta[b]naphthalen-6-yl 4-acetylbenzoate (30e)**

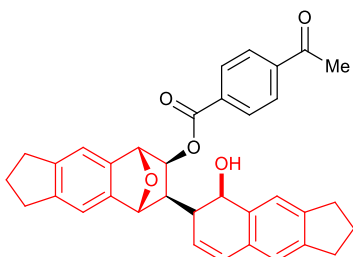

Brown Solid; eluent (5 % ethyl acetate in hexane). The reaction scale is 100 mg (**1e**), 84 mg was isolated, and the yield was 58% Mp: 148-149 °C. <sup>1</sup>H NMR (500 MHz, CDCl<sub>3</sub>) δ 7.73 (s, 1H), 7.69 – 7.51 (m, 7H), 7.33 (s, 1H), 7.12 (d, *J* = 1.9 Hz, 1H), 5.55 (ddd, *J* = 14.6, 9.6, 3.9 Hz, 2H), 5.48 – 5.38 (m, 1H), 3.64 – 3.48 (m, 1H), 3.24 – 3.13 (m, 1H), 3.08 – 2.81 (m, 8H), 2.52 (s, 3H), 2.22 – 2.09 (m, 4H). <sup>13</sup>C NMR (126 MHz, CDCl<sub>3</sub>) δ 197.6, 165.3, 145.4, 144.9, 144.1, 143.5, 143.3, 143.2, 139.8, 139.1, 137.4, 135.6, 134.4, 133.4, 132.6, 131.8, 131.4, 129.5, 128.9, 128.0, 127.9, 127.7, 127.0, 126.7, 126.4, 126.2, 125.1, 123.9, 123.4, 123.0, 121.8, 121.7, 118.7, 117.4, 116.9, 115.6, 51.7, 51.4, 32.7, 32.6, 32.5, 31.0, 30.7, 30.6, 26.7, 26.1, 25.7, 24.6, 24.5. HRMS (ESI-QTOF) *m/z*: [M+K]<sup>+</sup> calcd for C<sub>35</sub>H<sub>32</sub>O<sub>5</sub>K 571.1881; Found 571.1896.

**(2S,3S)-3-((2S)-1-hydroxy-6,7-dimethoxy-1,2-dihydronaphthalen-2-yl)-6,7-dimethoxy-1,2,3,4-tetrahydro-1,4-epoxynaphthalen-2-yl adamantane-1-carboxylate (3ac)**

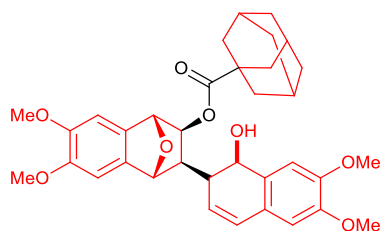

White Solid; eluent (5 % ethyl acetate in hexane). The reaction scale is 100 mg (**1c**), 100 mg was isolated, and the yield was 69%. Mp: 180-181 °C. <sup>1</sup>H NMR (400 MHz, CDCl<sub>3</sub>) δ 7.19 (s, 1H), 7.01 (d, *J* = 9.7 Hz, 2H), 6.90 (s, 1H), 6.69 (s, 1H), 5.75 (s, 1H), 5.58 (s, 2H), 4.91 (s, 1H), 3.96 (s, 1H), 3.91 (s, 3H), 3.82 (s, 6H), 3.65 (s, 3H), 3.27 (d, *J* = 8.8 Hz, 1H), 2.43 (dd, *J* = 8.8, 2.3 Hz, 1H), 2.04 (s, 3H), 1.95 (s, 6H), 1.71 (d, *J* = 13.7 Hz, 6H). <sup>13</sup>C NMR (101 MHz, CDCl<sub>3</sub>) δ 177.1, 149.4, 149.2, 148.7, 148.3, 139.3, 134.3, 133.7, 129.0, 128.1, 127.1, 126.6, 125.7, 106.2, 105.9, 105.3, 103.9, 85.4, 83.4, 75.4, 56.3, 55.8, 51.3, 40.3, 38.0, 36.2, 27.6. HRMS (ESI-QTOF) *m/z*: [M+Na]<sup>+</sup> calcd for C<sub>35</sub>H<sub>40</sub>O<sub>8</sub>Na 611.2615; Found 611.2640.

**(2S,3S)-3-((2S)-1-hydroxy-6,7-dimethoxy-1,2-dihydronaphthalen-2-yl)-6,7-dimethoxy-1,2,3,4-tetrahydro-1,4-epoxynaphthalen-2-yl acetate (3cc)**

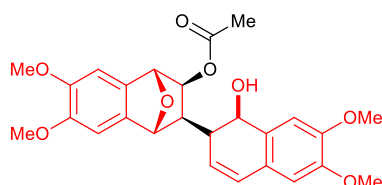

Brown Solid; eluent (5 % ethyl acetate in hexane). The reaction scale is 100 mg (**1c**), 80 mg was isolated, and the yield was 70%. Mp: 114-115 °C. <sup>1</sup>H NMR (400 MHz, CDCl<sub>3</sub>) δ 7.66 – 7.60 (m, 2H), 7.36 (d, *J* = 8.4 Hz, 1H), 7.11 (d, *J* = 5.4 Hz, 2H), 7.01 (d, *J* = 3.1 Hz, 1H), 6.91 (s, 1H), 5.45 (s, 1H), 5.39 (s, 1H), 5.20 (d, *J* = 6.9 Hz, 1H), 4.04 (s, 1H), 4.00 (d, *J* = 3.9 Hz, 7H), 3.90 (d, *J* = 6.9 Hz, 7H), 3.37 (d, *J* = 6.9 Hz, 1H), 1.47 (s, 1H), 1.43 (s, 3H). <sup>13</sup>C NMR (101 MHz, CDCl<sub>3</sub>) δ 170.4, 148.8, 148.3, 133.7, 128.8, 127.0, 126.4, 125.7, 106.4, 106.0, 105.4, 103.9, 85.4, 83.1, 56.4, 56.3, 55.8, 51.6, 20.4. HRMS (ESI-QTOF) *m/z*: [M+H]<sup>+</sup> calcd for C<sub>26</sub>H<sub>28</sub>O<sub>8</sub> 468.1779; Found 468.1733.

**(6S,7S)-7-((6S)-5-hydroxy-2,3,4a,5,6,8a-hexahydro-1H-cyclopenta[b]naphthalen-6-yl)-2,3,5,6,7,8-hexahydro-1H-5,8-epoxycyclopenta[b]naphthalen-6-yl acetate (3ce)**

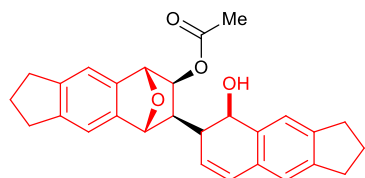

Brown Solid; eluent (5 % ethyl acetate in hexane). The reaction scale is 100 mg (**1e**), 72 mg was isolated, and the yield was 62%. Mp: 106-107 °C. <sup>1</sup>H NMR (500 MHz, CDCl<sub>3</sub>) δ 7.63 – 7.59 (m, 2H), 7.54 (s, 1H), 7.41 – 7.30 (m, 1H), 7.07 (s, 1H), 7.04 – 6.97 (m, 1H), 5.44 (s, 1H), 5.35 (d, *J* = 15.4 Hz, 1H), 5.20 – 5.14 (m, 1H), 3.39 – 3.32 (m, 1H), 3.18 (s, 1H), 2.99 –

2.79 (m, 8H), 2.10 – 2.01 (m, 4H), 1.35 (d,  $J = 2.4$  Hz, 3H).  $^{13}\text{C}$  NMR (126 MHz,  $\text{CDCl}_3$ )  $\delta$  170.3, 145.5, 143.9, 143.4, 143.2, 140.4, 135.3, 134.4, 132.5, 131.8, 129.3, 129.0, 128.2, 127.0, 126.7, 126.6, 123.6, 123.3, 122.6, 122.1, 121.7, 118.5, 117.2, 116.8, 115.5, 85.2, 85.1, 83.9, 83.0, 82.9, 81.8, 76.3, 51.6, 50.8, 33.7, 32.6, 31.0, 30.6, 30.5, 26.1, 25.7, 24.5, 20.4. HRMS (ESI-QTOF)  $m/z$ :  $[\text{M} + \text{Na}]^+$  calcd for  $\text{C}_{28}\text{H}_{28}\text{O}_4\text{Na}$  451.1880; Found 451.1861.

**(2S,3S)-3-((2S)-6,7-Difluoro-1-hydroxy-1,2-dihydronaphthalen-2-yl)-6,7-difluoro-1,2,3,4-tetrahydro-1,4-epoxynaphthalen-2-yl propionate (3df)**

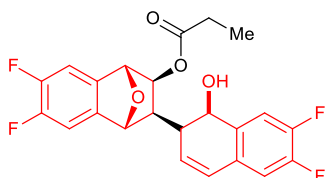

Brown Solid; eluent (5 % ethyl acetate in hexane). The reaction scale is 100 mg (**1f**), 78 mg was isolated, and the yield was 65%. Mp: 114-115 °C.  $^1\text{H}$  NMR (400 MHz,  $\text{CDCl}_3$ )  $\delta$  7.23 (ddd,  $J = 10.8, 7.3, 3.2$  Hz, 2H), 7.12 (dd,  $J = 8.6, 6.8$  Hz, 1H), 6.96 (dd,  $J = 10.4, 7.7$  Hz, 1H), 6.43 (dd,  $J = 9.7, 2.7$  Hz, 1H), 5.61 (s, 1H), 5.56 (d,  $J = 9.7$  Hz, 1H), 5.26 (s, 1H), 5.16 (d,  $J = 7.0$  Hz, 1H), 4.84 (s, 1H), 2.94 – 2.85 (m, 1H), 2.45 – 2.34 (m, 3H), 1.75 (s, 1H), 1.15 (t,  $J = 7.6$  Hz, 3H).  $^{13}\text{C}$  NMR (101 MHz,  $\text{CDCl}_3$ )  $\delta$  174.3, 148.1, 142.8, 136.8, 132.5, 130.2, 129.1, 129.1, 125.3, 117.5, 117.3, 115.5, 115.4, 111.1, 110.9, 109.5, 109.3, 84.3, 80.4, 74.1, 68.6, 44.6, 38.0, 27.8, 8.9. HRMS (ESI-QTOF)  $m/z$ :  $[\text{M} + \text{H}]^+$  calcd for  $\text{C}_{23}\text{H}_{19}\text{F}_4\text{O}_4$  435.1214; Found 435.1198.



$^1\text{H}$  and  $^{13}\text{C}$  NMR Spectra of Compound **3aa** ( $\text{CDCl}_3$ , 400 MHz)

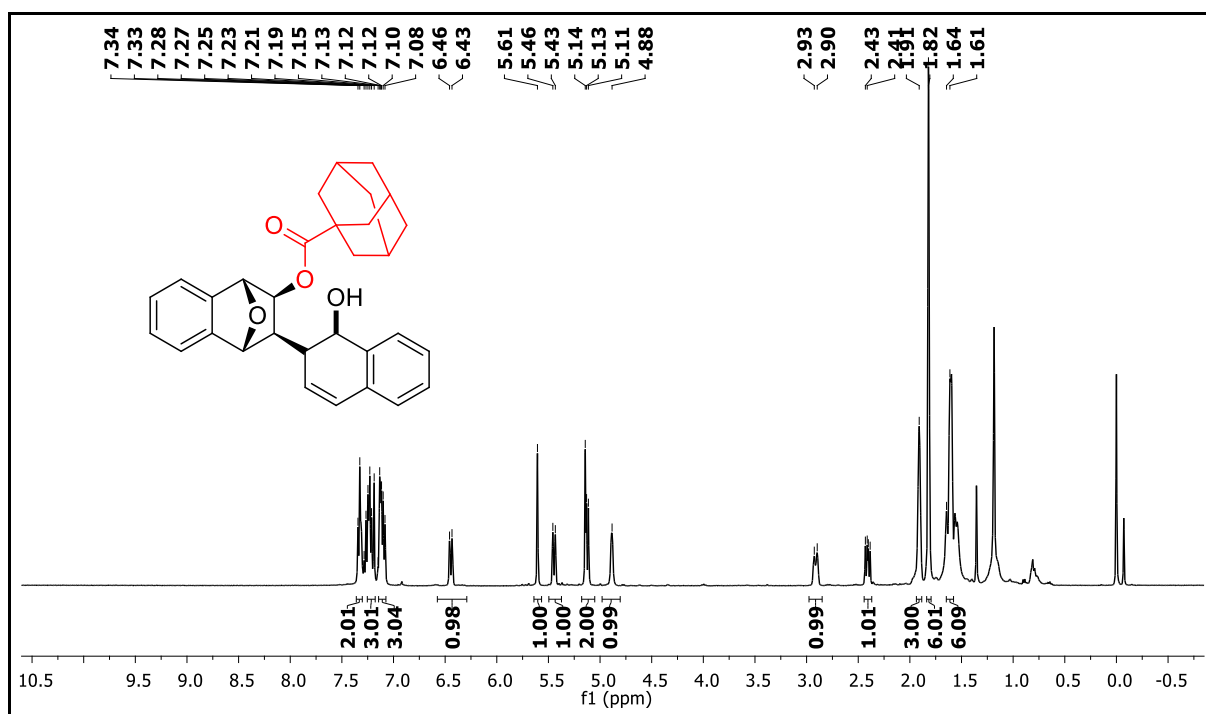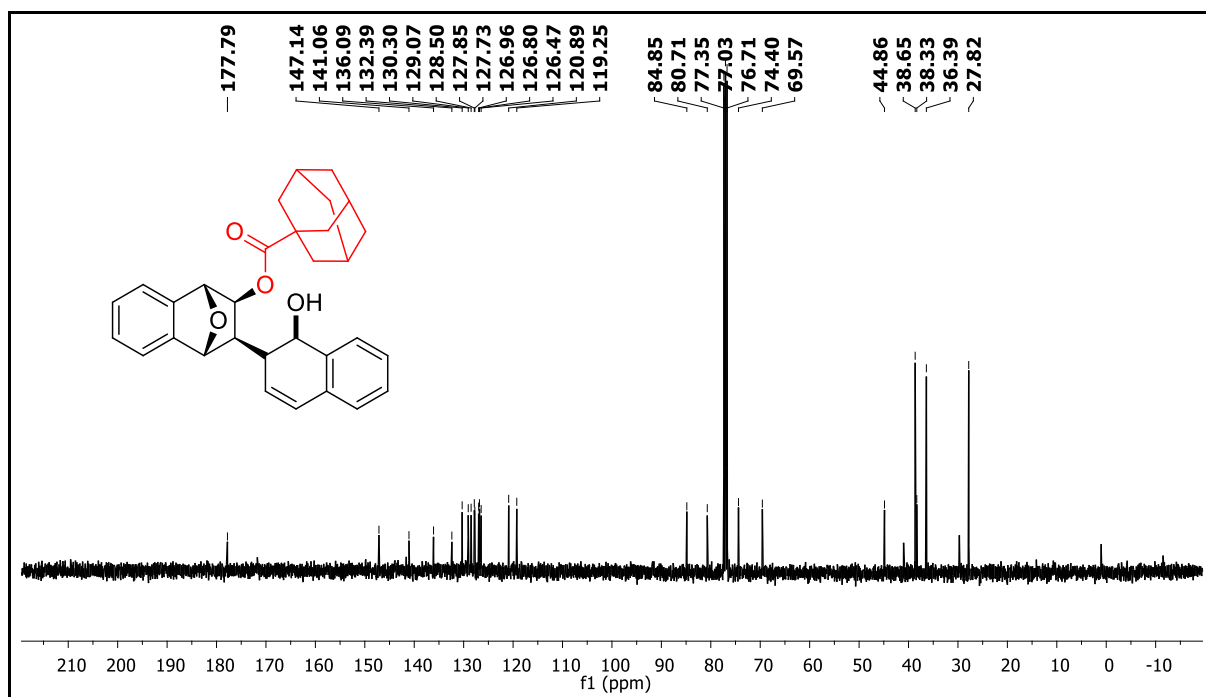

$^1\text{H}$  and  $^{13}\text{C}$  NMR Spectra of Compound **3ba** ( $\text{CDCl}_3$ , 400 MHz)

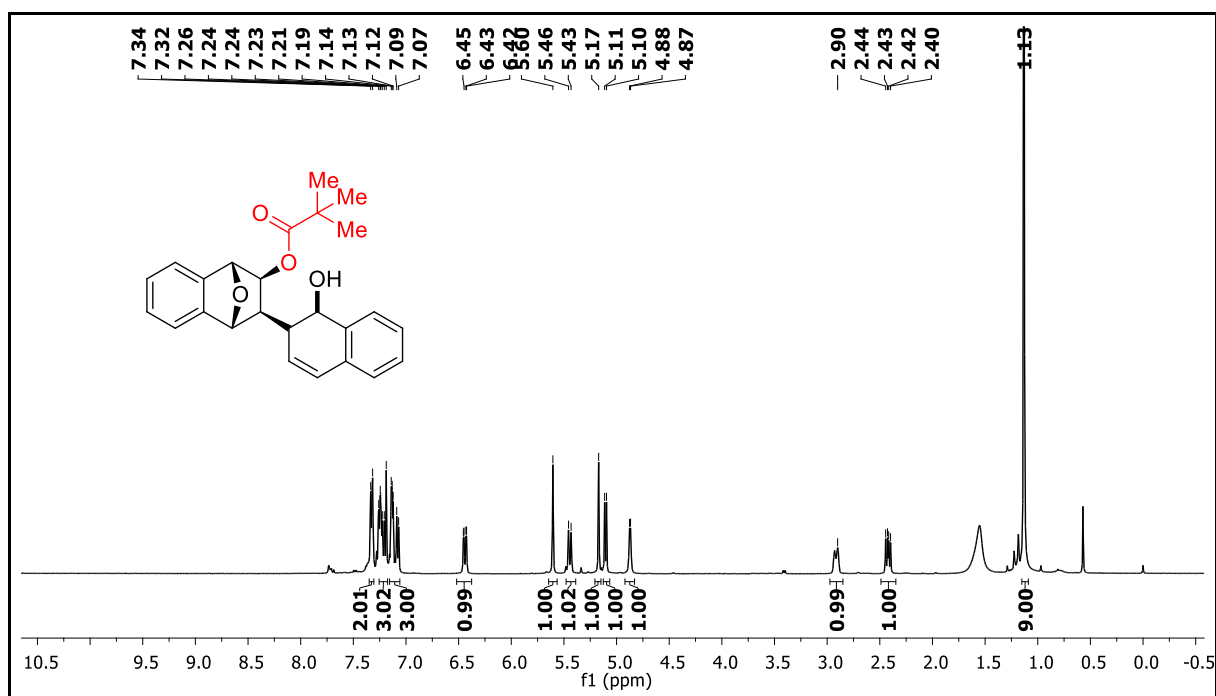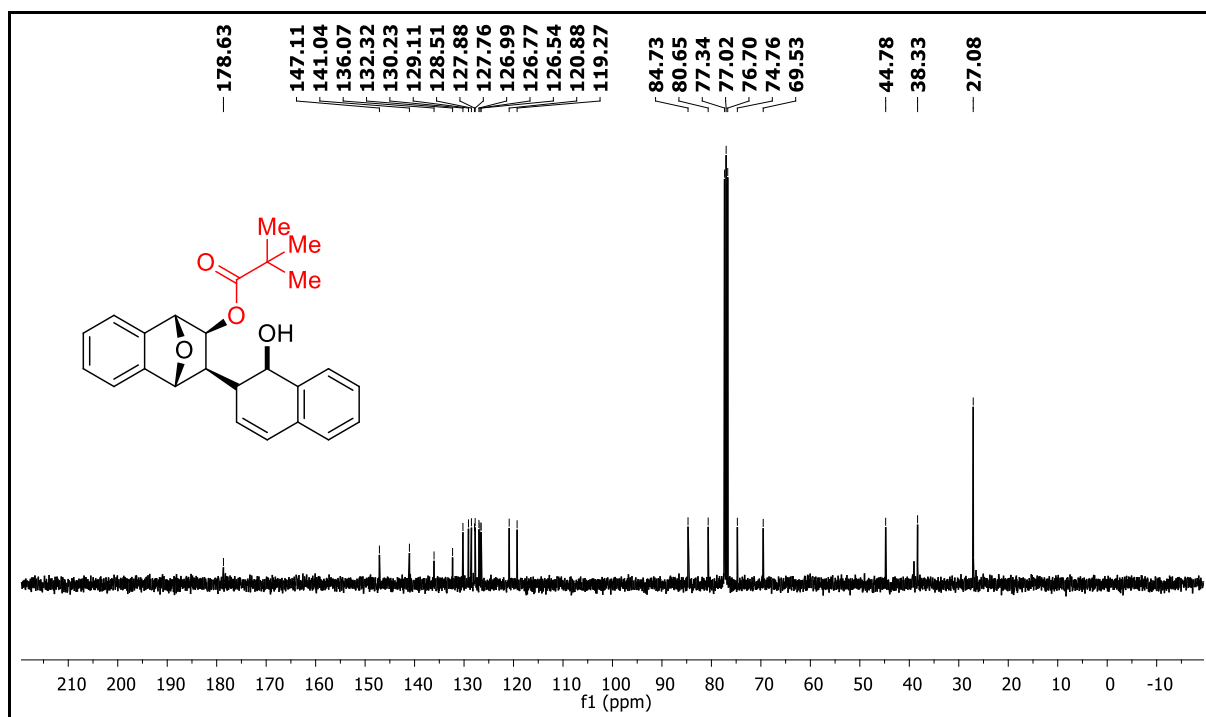

$^1\text{H}$  and  $^{13}\text{C}$  NMR Spectra of Compound **3ca** ( $\text{CDCl}_3$ , 400 MHz)

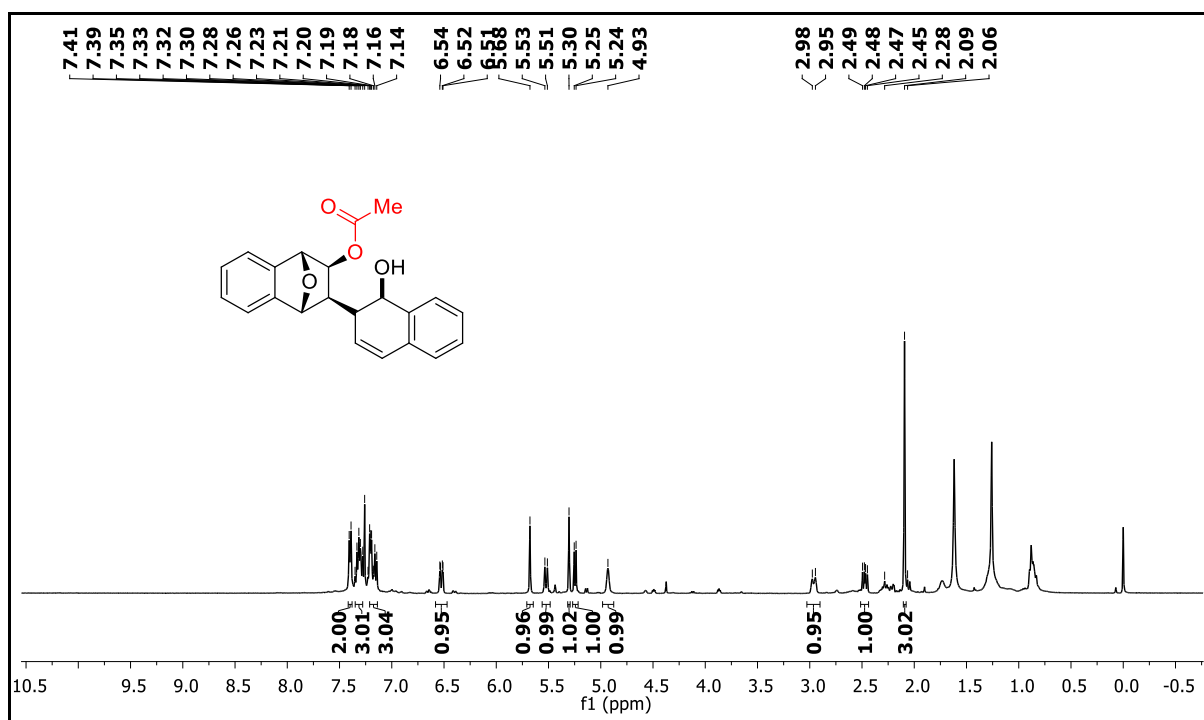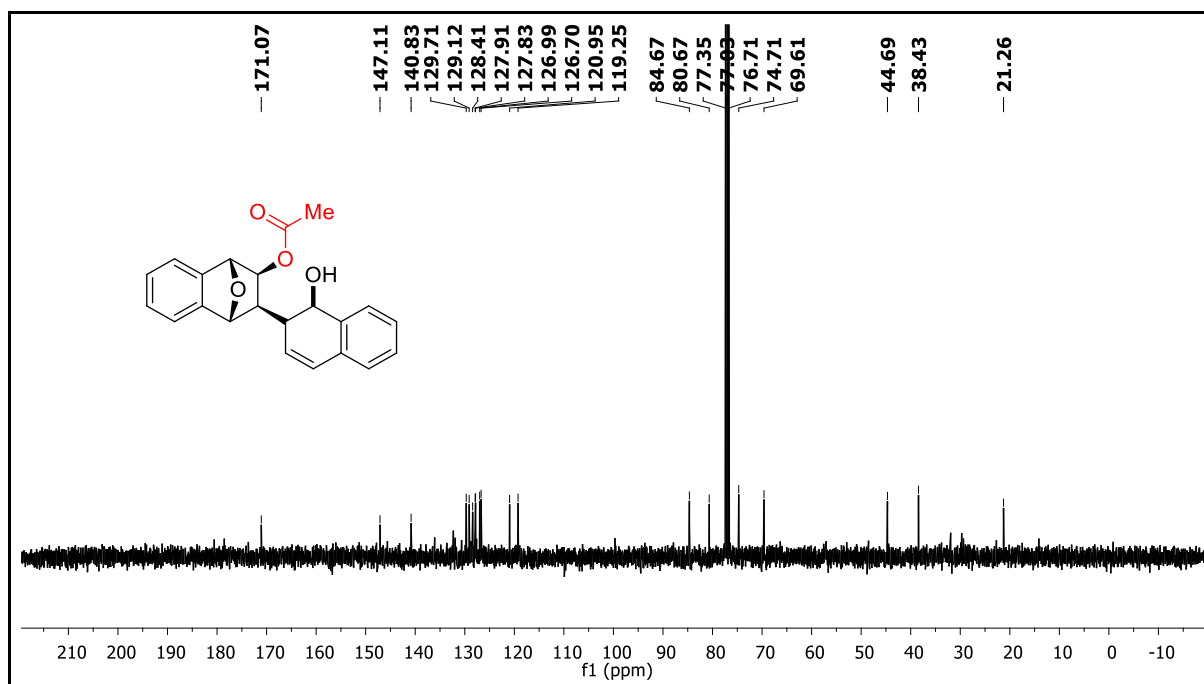

$^1\text{H}$  and  $^{13}\text{C}$  NMR Spectra of Compound **3da** ( $\text{CDCl}_3$ , 500 MHz)

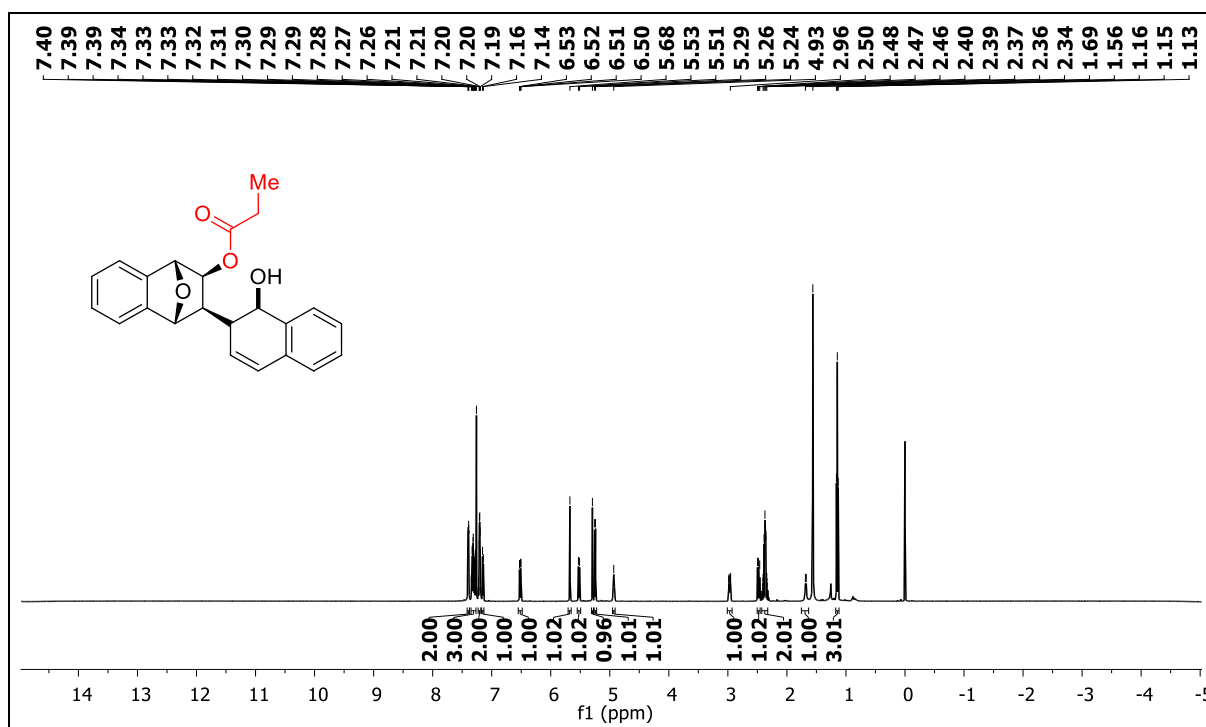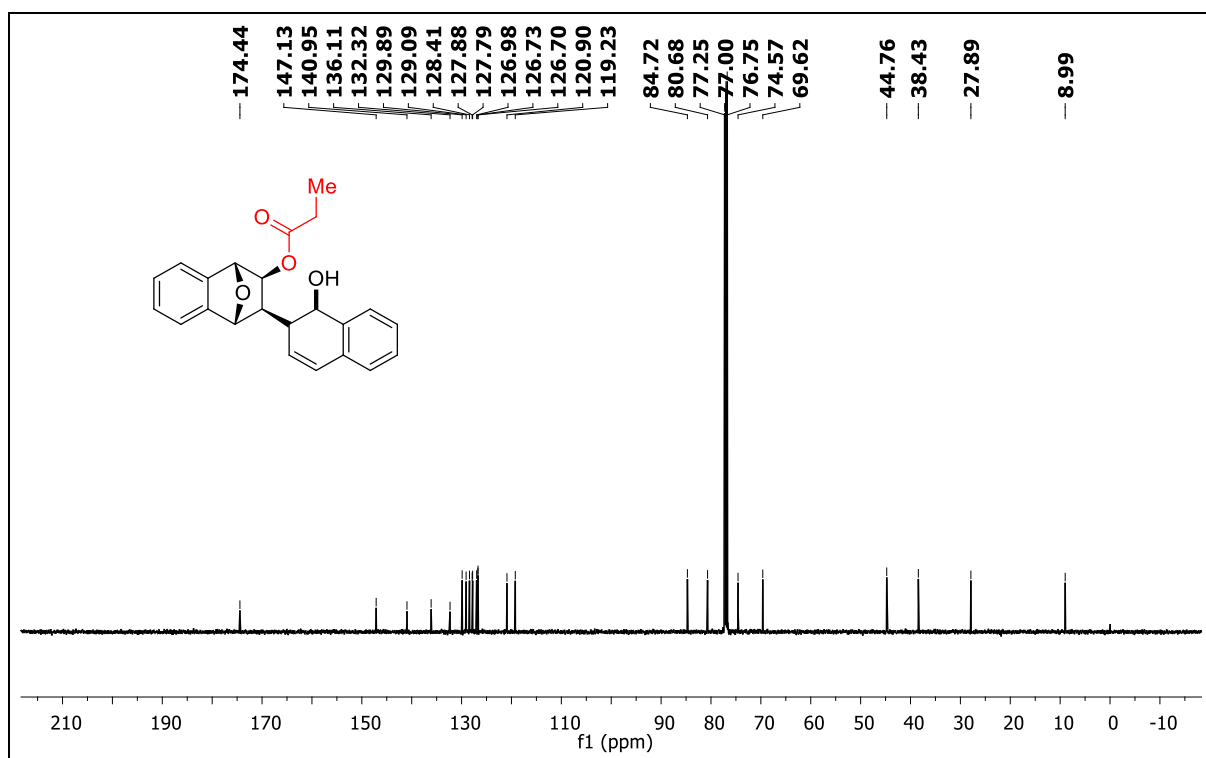

$^1\text{H}$  and  $^{13}\text{C}$  NMR Spectra of Compound **3ea** ( $\text{CDCl}_3$ , 500 MHz)

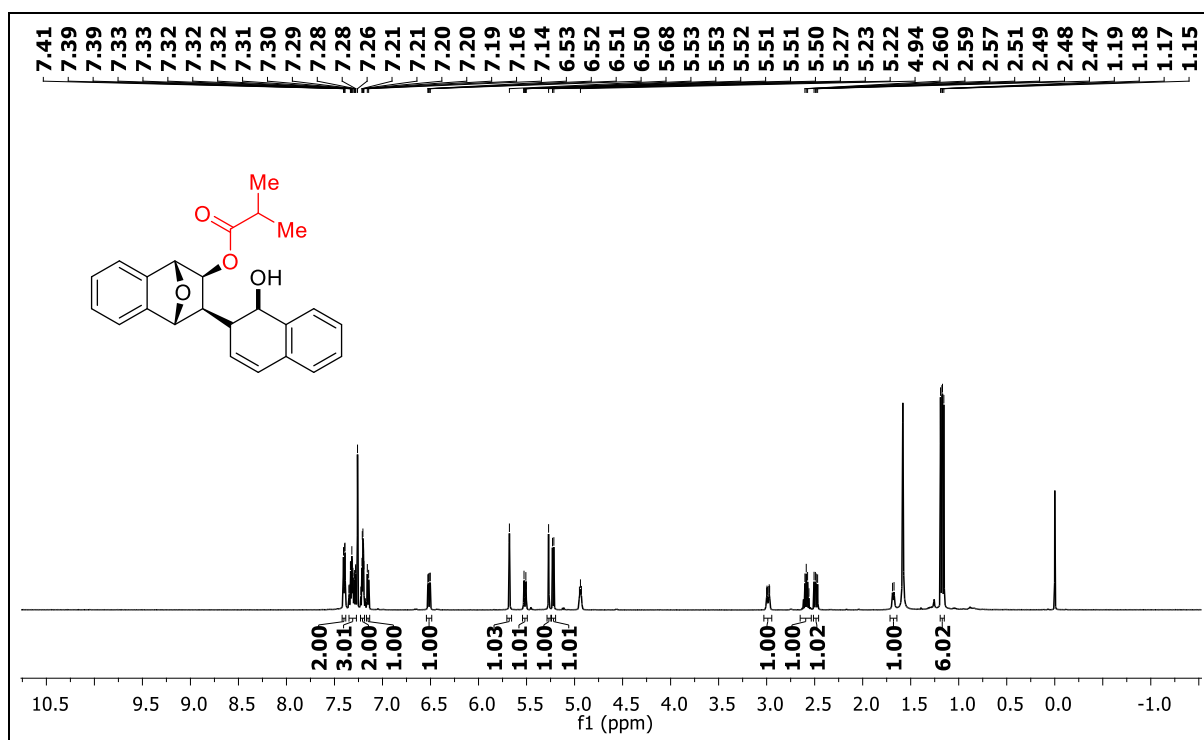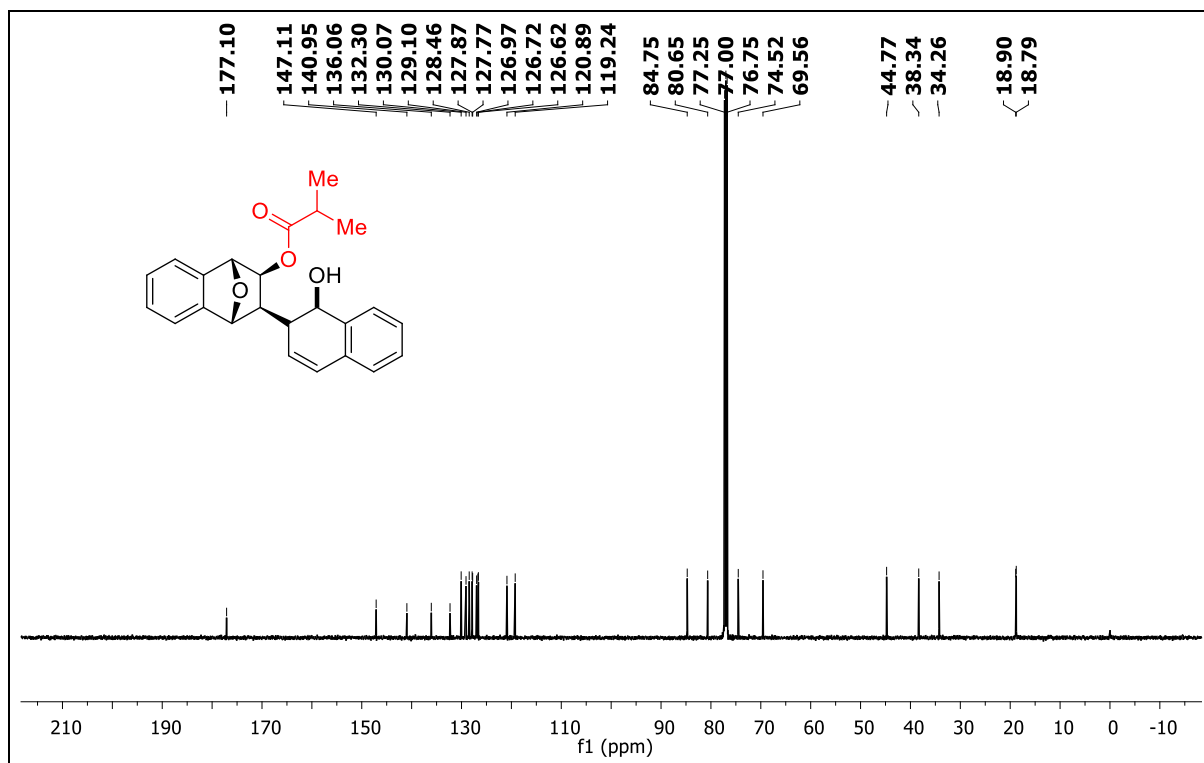

$^1\text{H}$  and  $^{13}\text{C}$  NMR Spectra of Compound **3fa** ( $\text{CDCl}_3$ , 400 MHz)

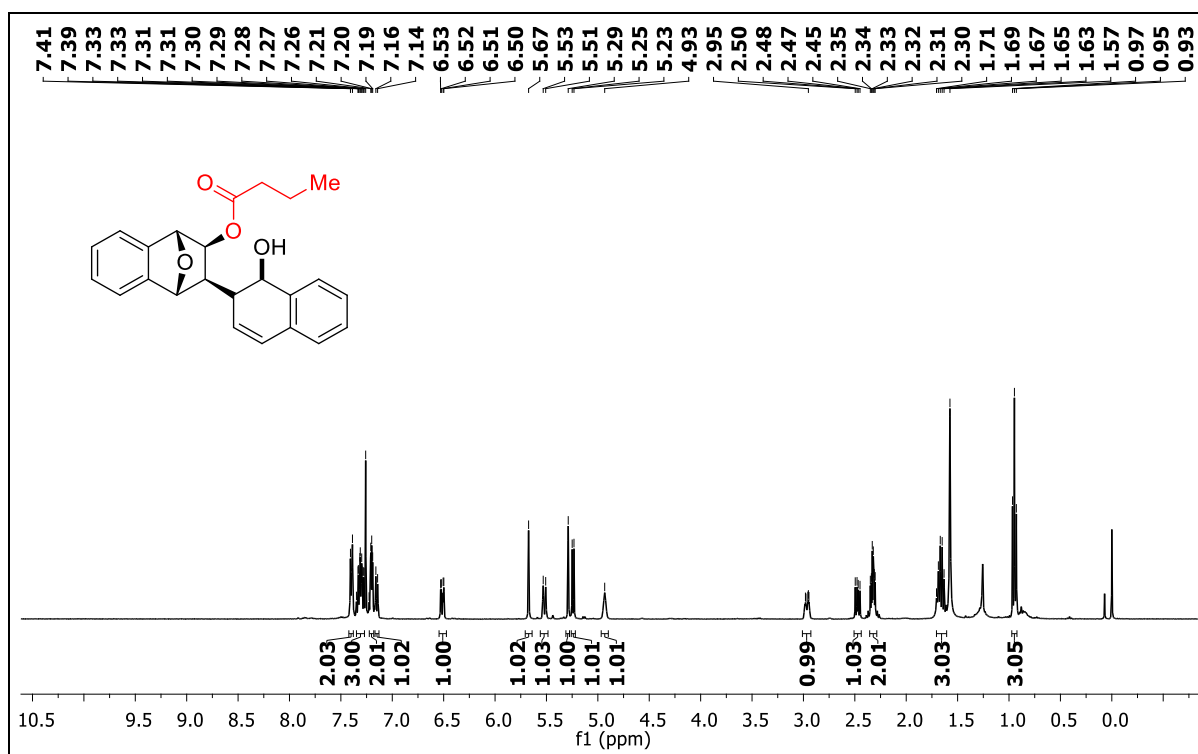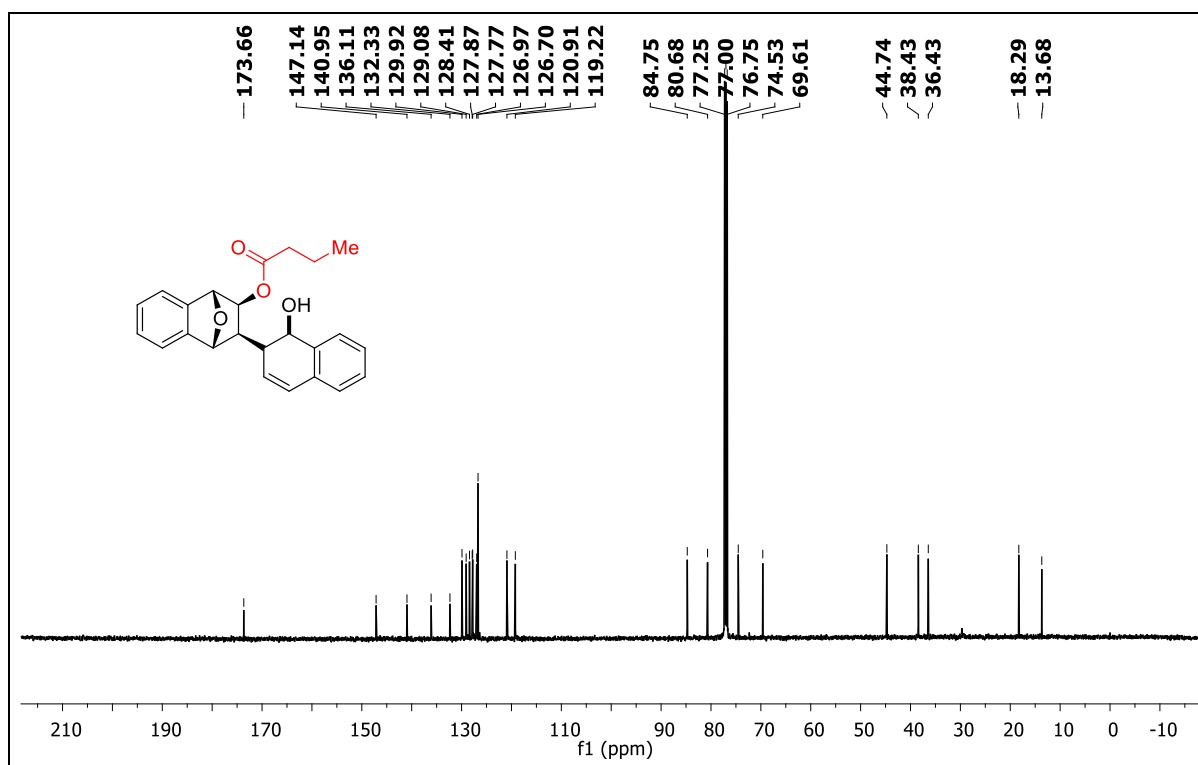

$^1\text{H}$  and  $^{13}\text{C}$  NMR Spectra of Compound **3ga** ( $\text{CDCl}_3$ , 500 MHz)

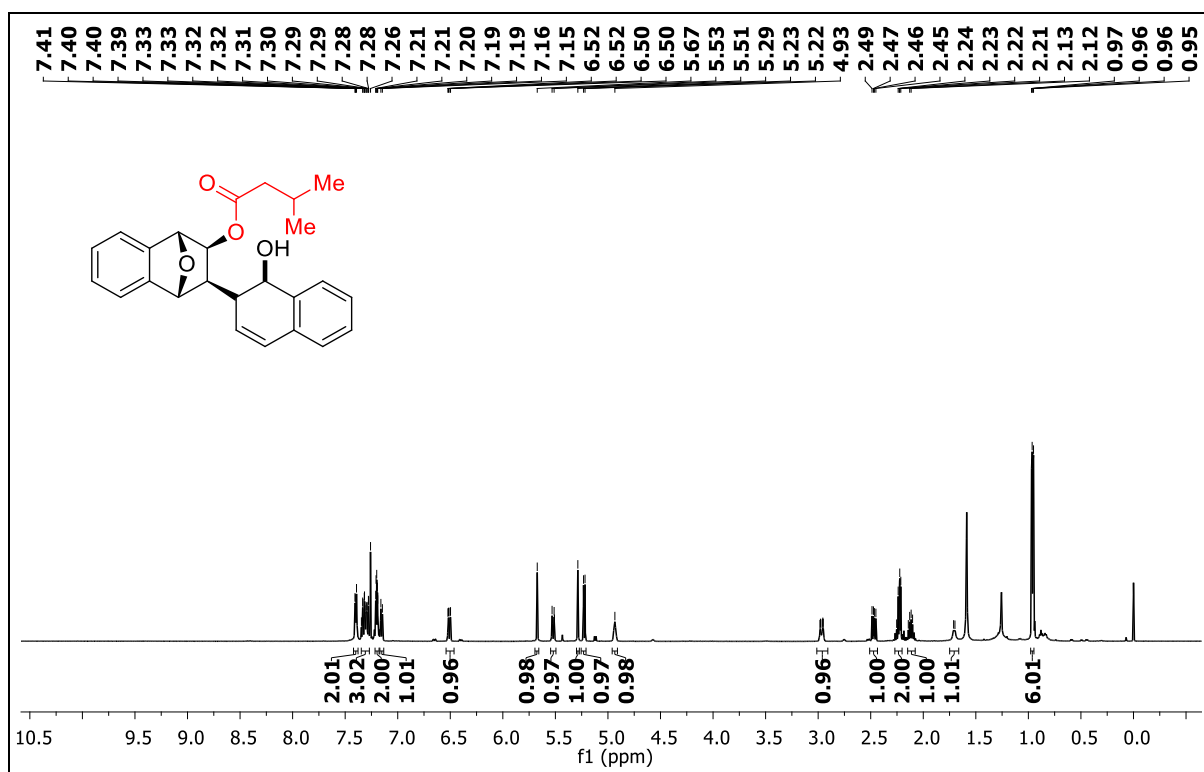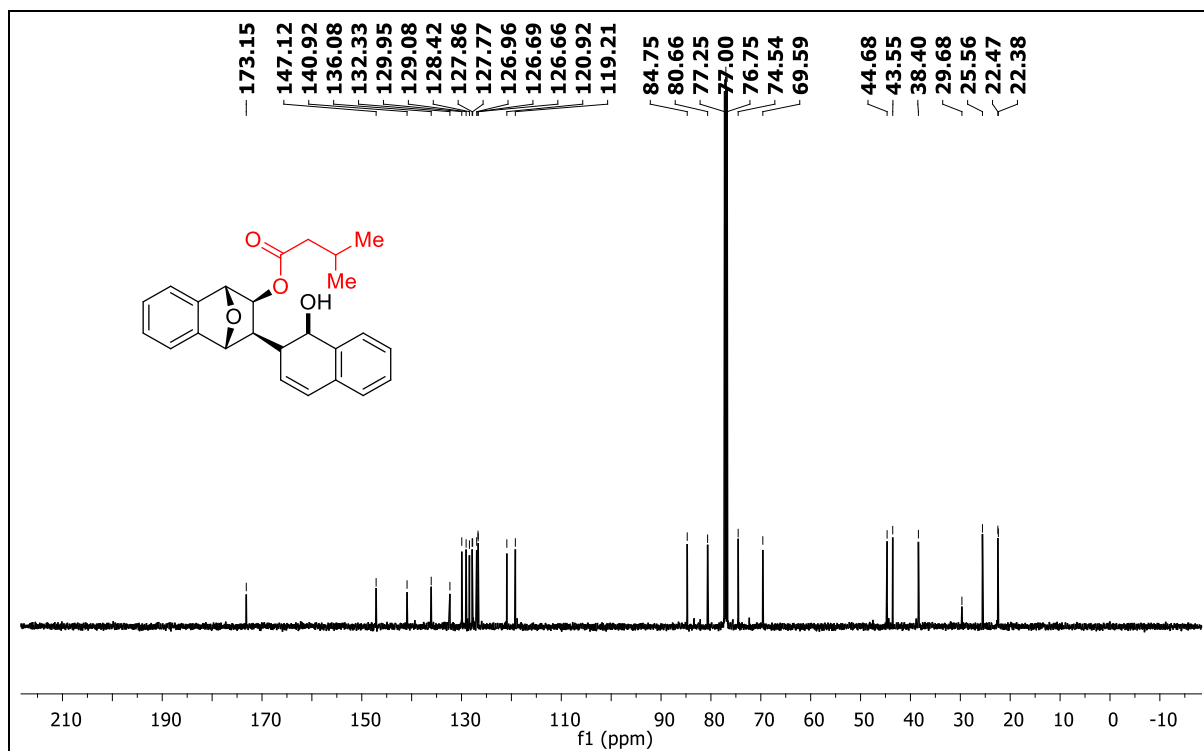

$^1\text{H}$  and  $^{13}\text{C}$  NMR Spectra of Compound **3ha** ( $\text{CDCl}_3$ , 500 MHz)

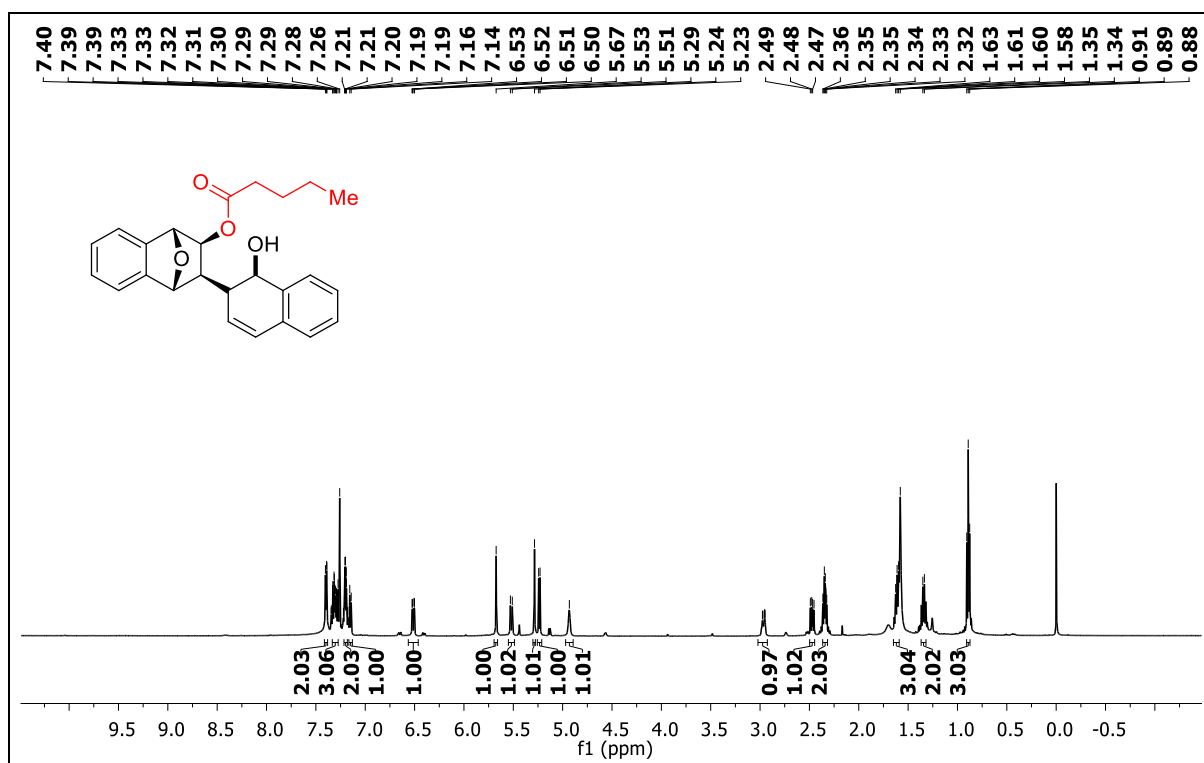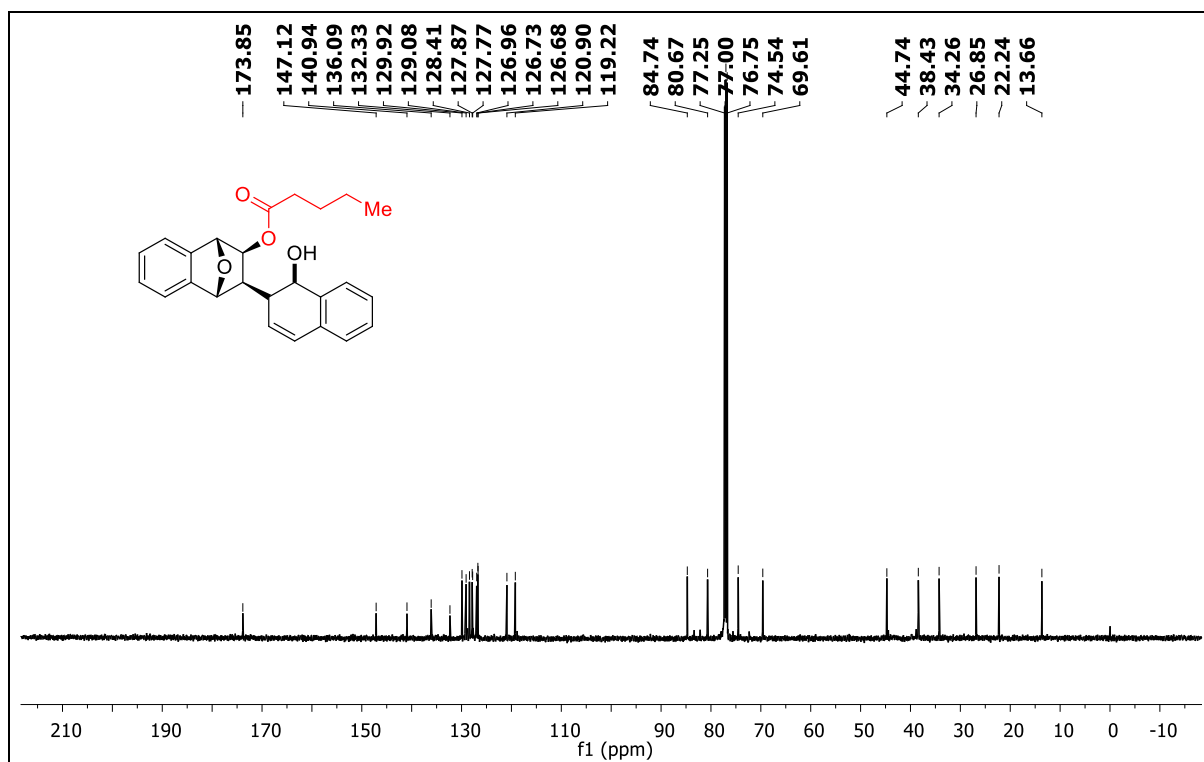



$^1\text{H}$  and  $^{13}\text{C}$  NMR Spectra of Compound **3ia** ( $\text{CDCl}_3$ , 500 MHz)

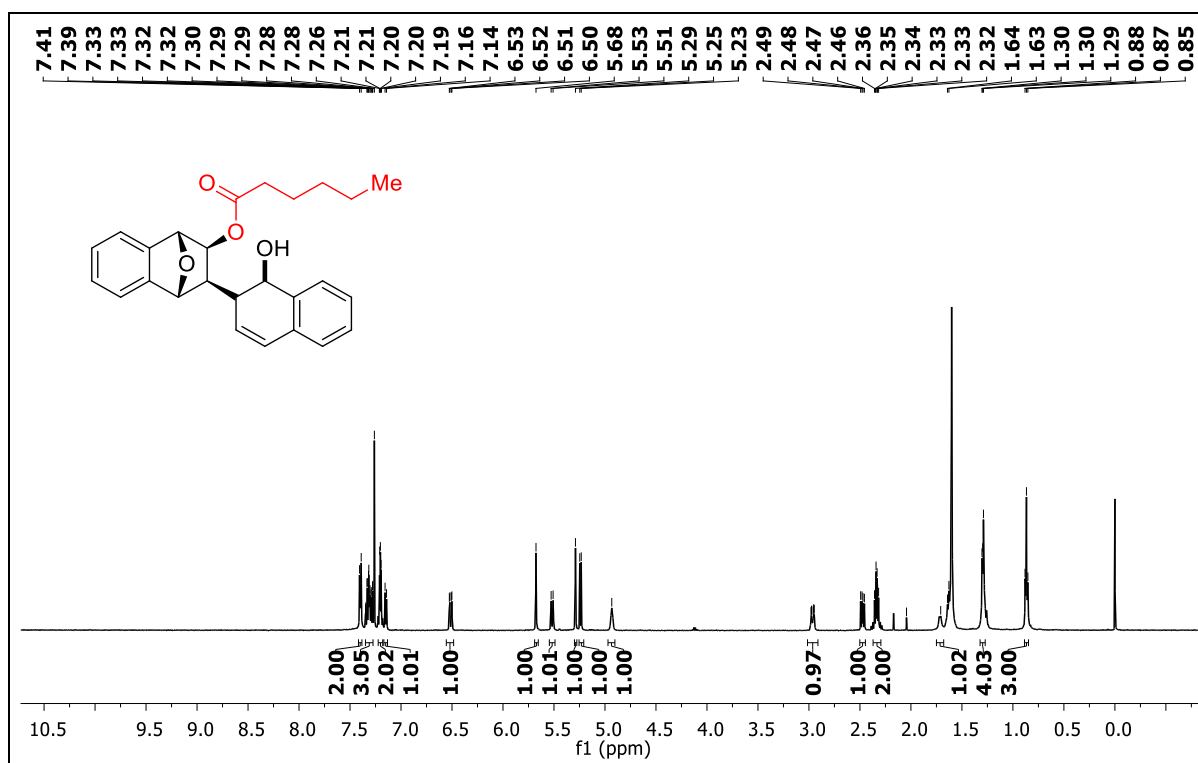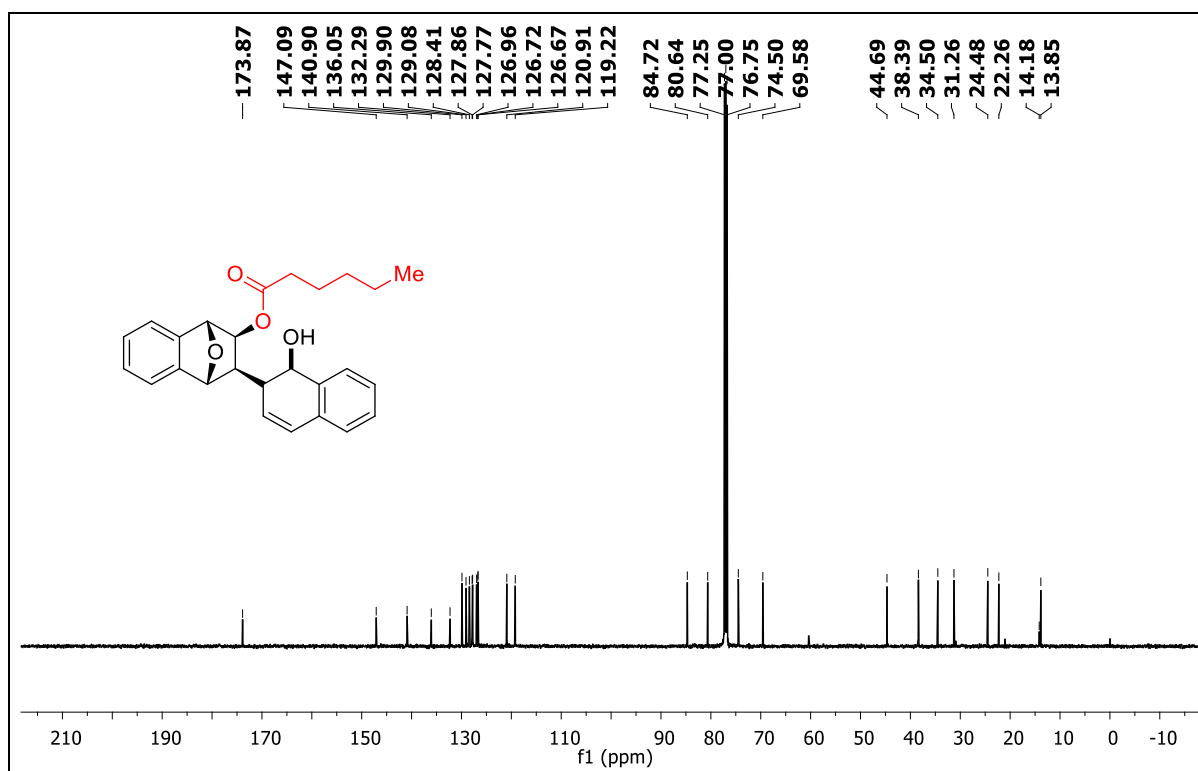

$^1\text{H}$  and  $^{13}\text{C}$  NMR Spectra of Compound **3ja** ( $\text{CDCl}_3$ , 500 MHz)

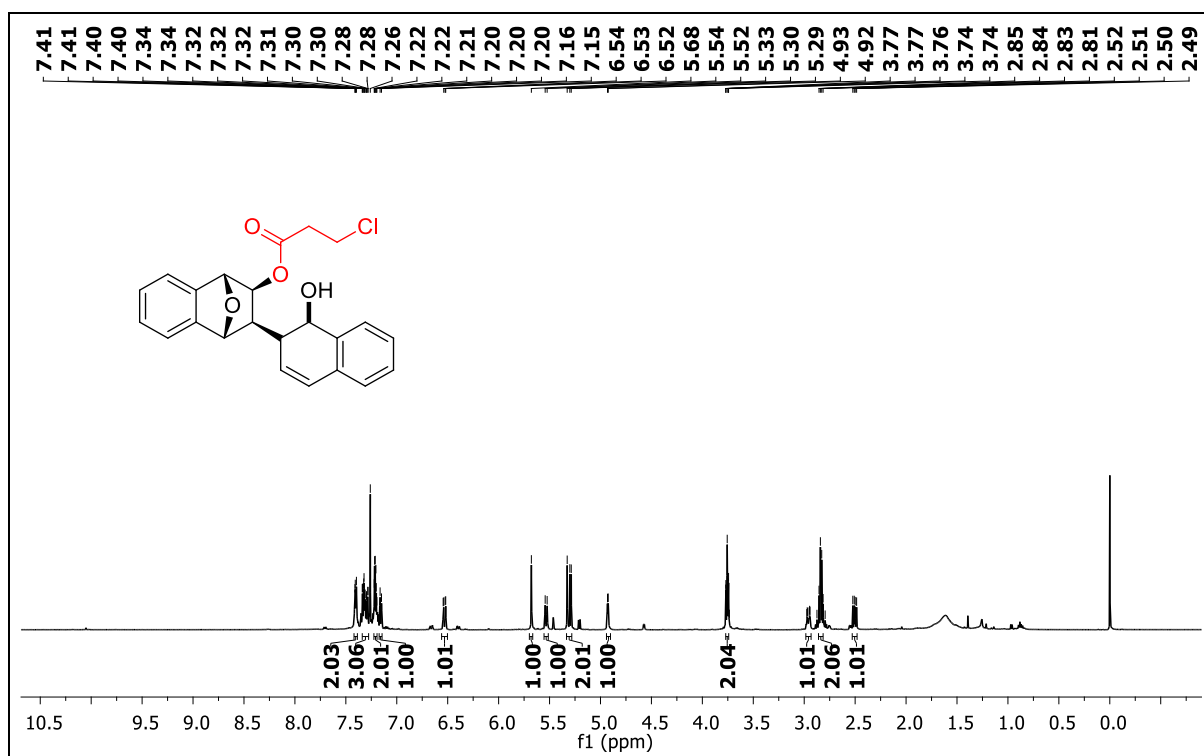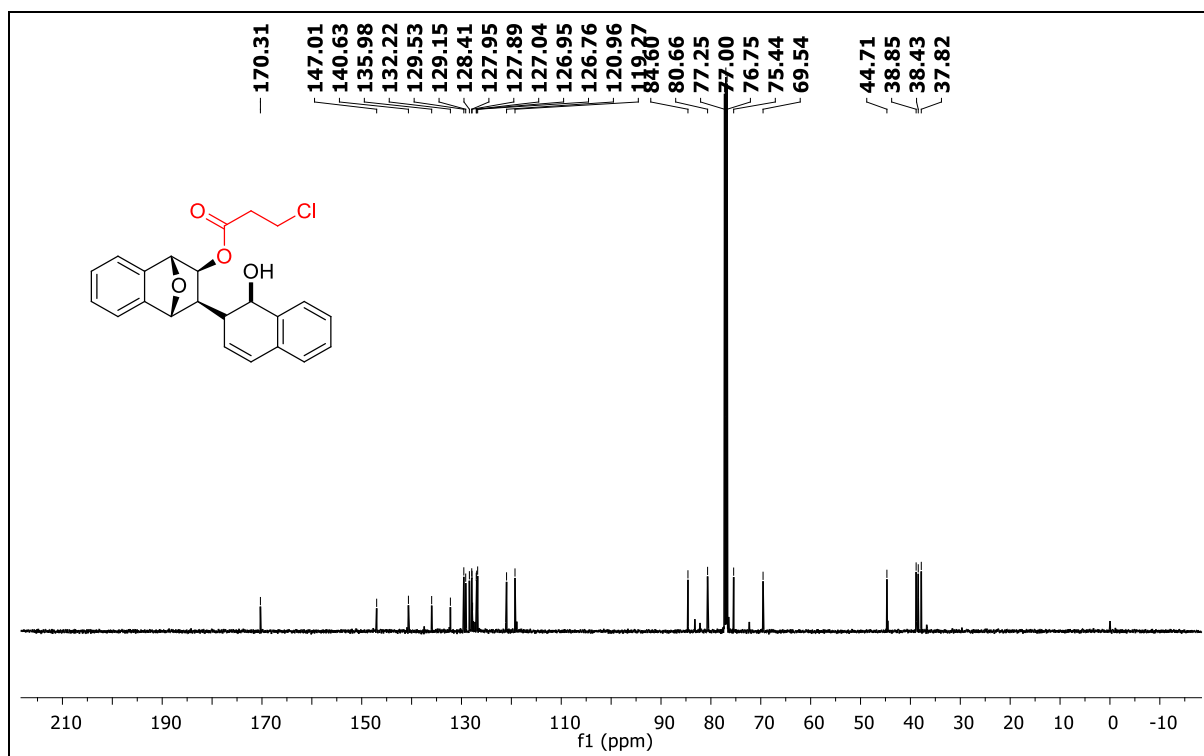

$^1\text{H}$  and  $^{13}\text{C}$  NMR Spectra of Compound **3ka** ( $\text{CDCl}_3$ , 400 MHz)

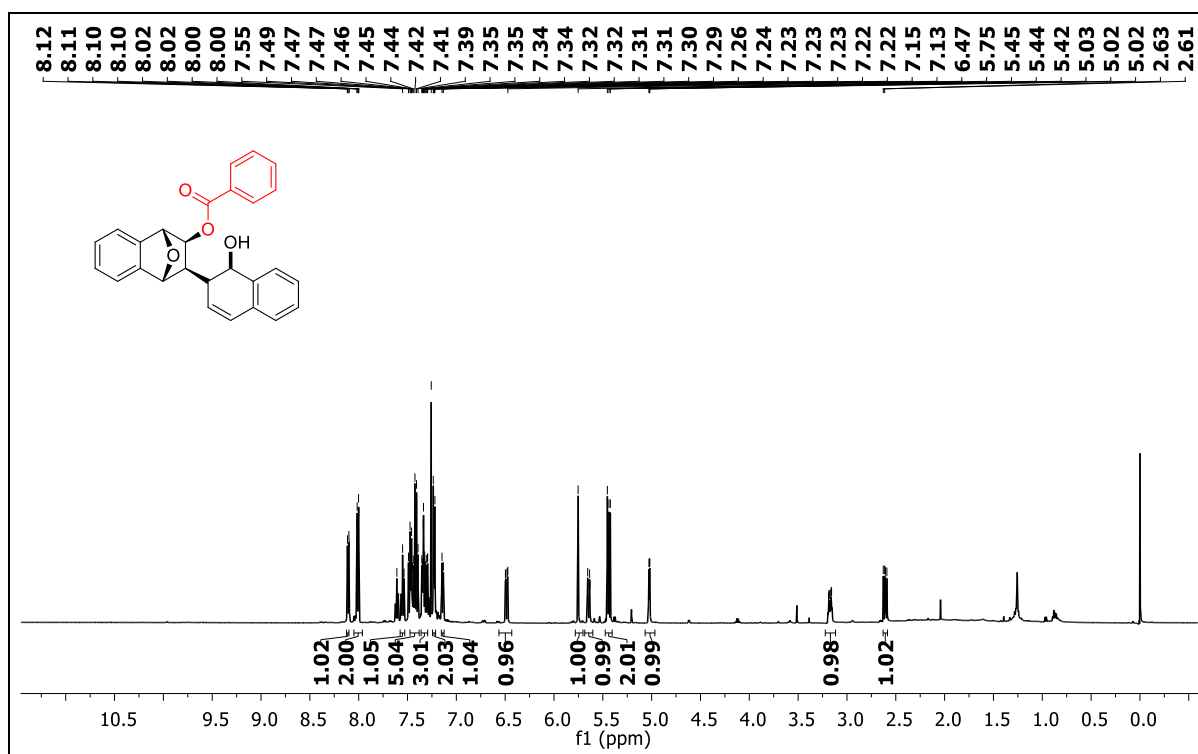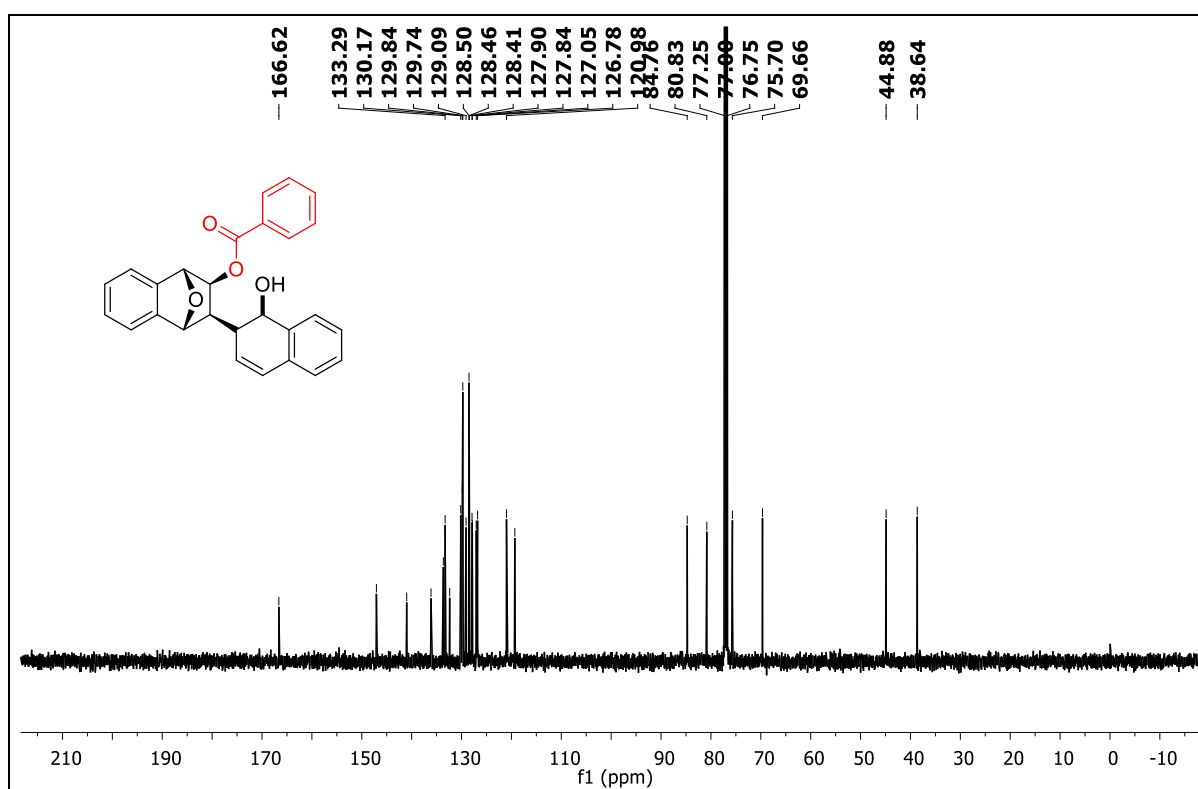

$^1\text{H}$  and  $^{13}\text{C}$  NMR Spectra of Compound **3la** ( $\text{CDCl}_3$ , 400 MHz)

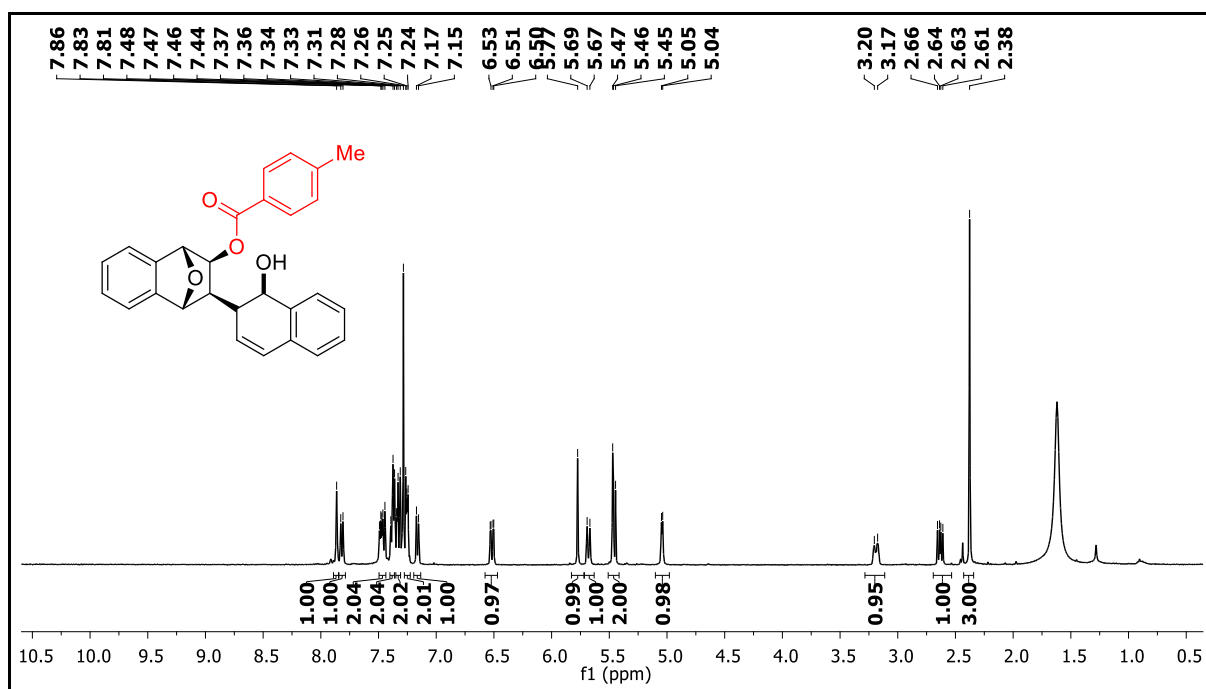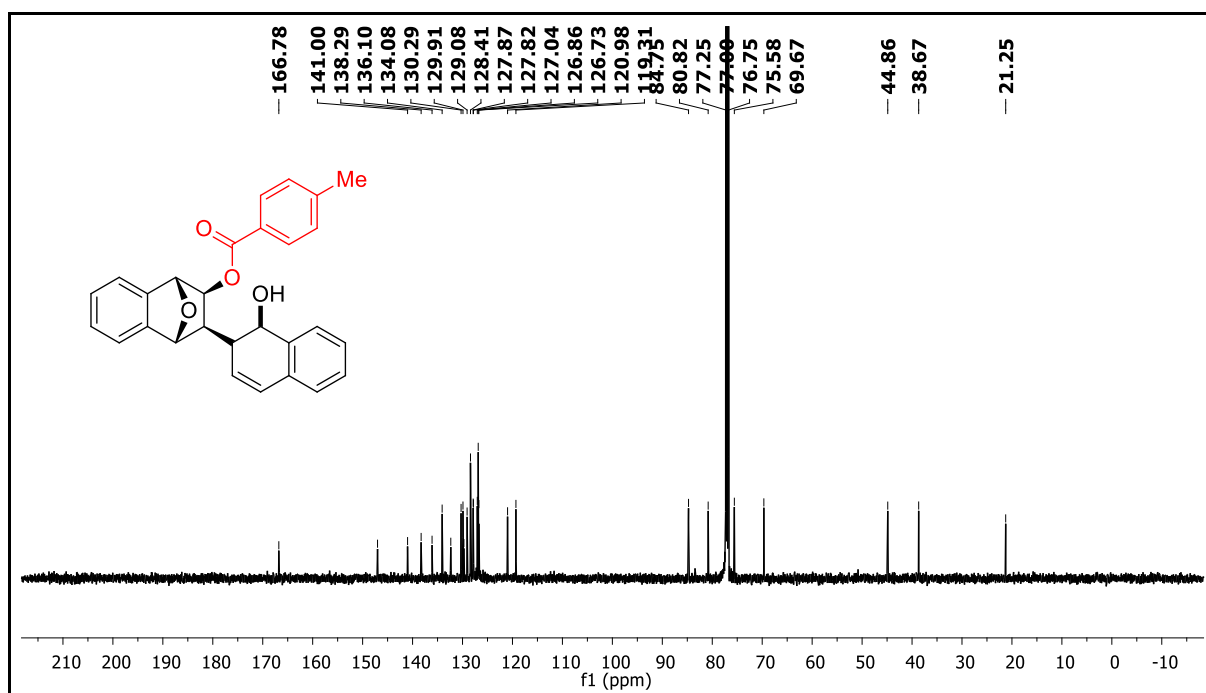

$^1\text{H}$  and  $^{13}\text{C}$  NMR Spectra of Compound **3ma** ( $\text{CDCl}_3$ , 400 MHz)

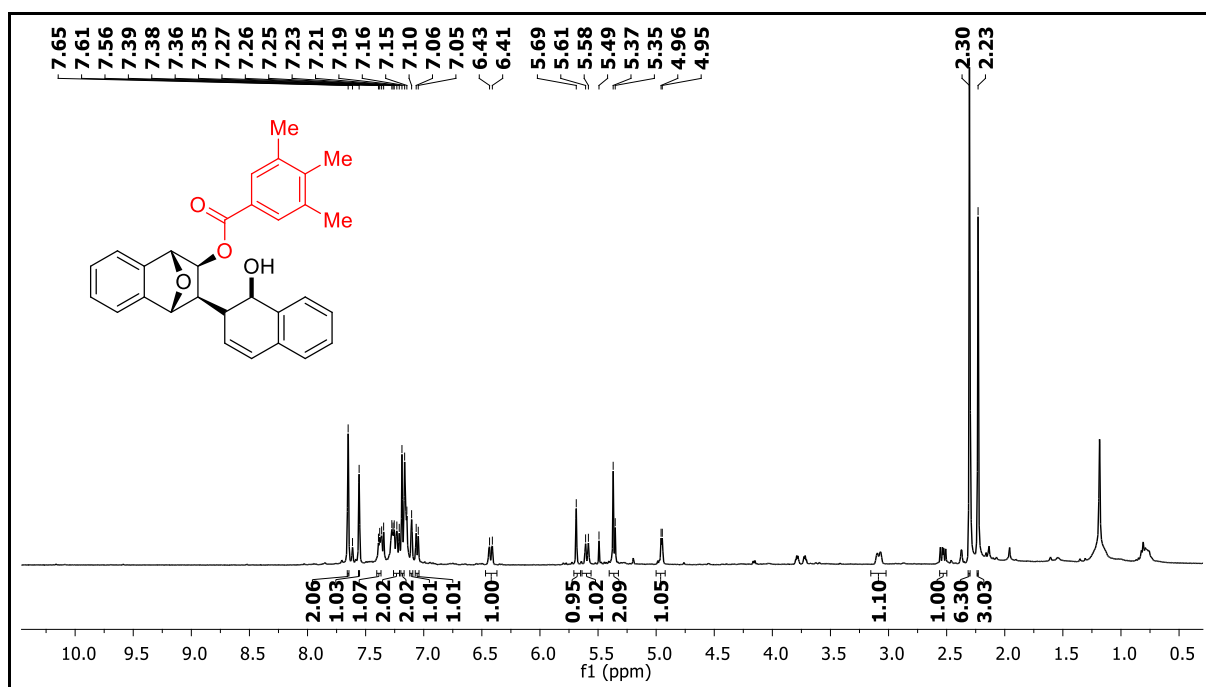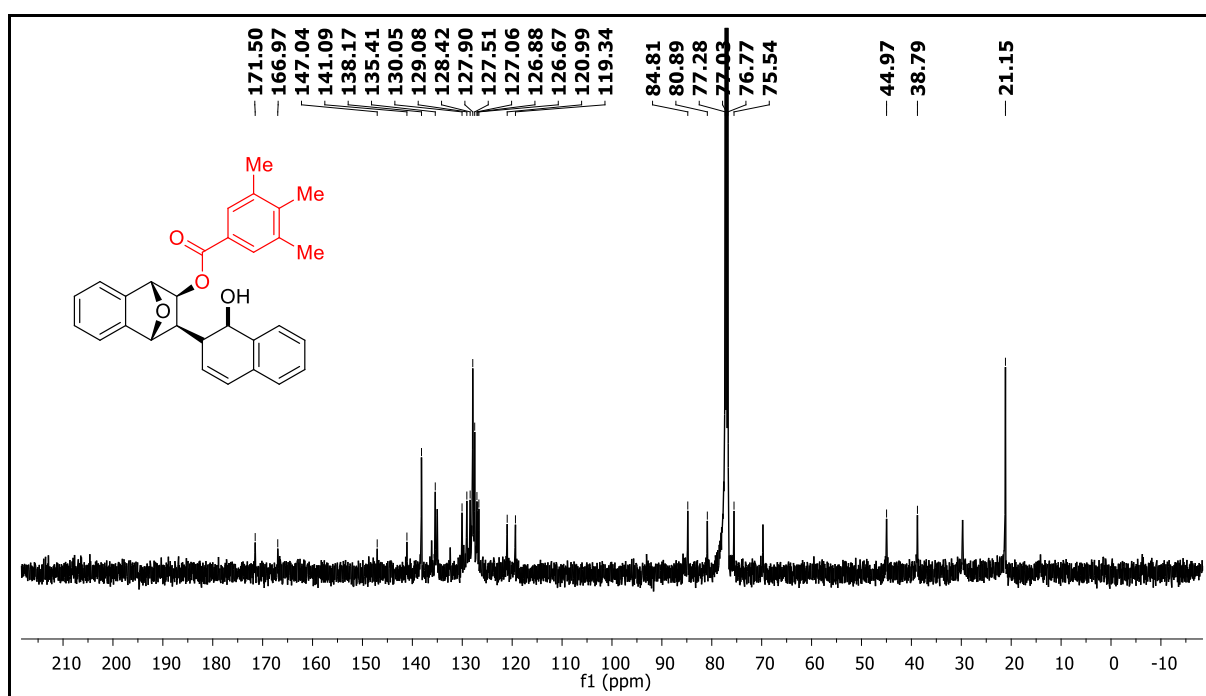

$^1\text{H}$  and  $^{13}\text{C}$  NMR Spectra of Compound **3na** ( $\text{CDCl}_3$ , 400 MHz)

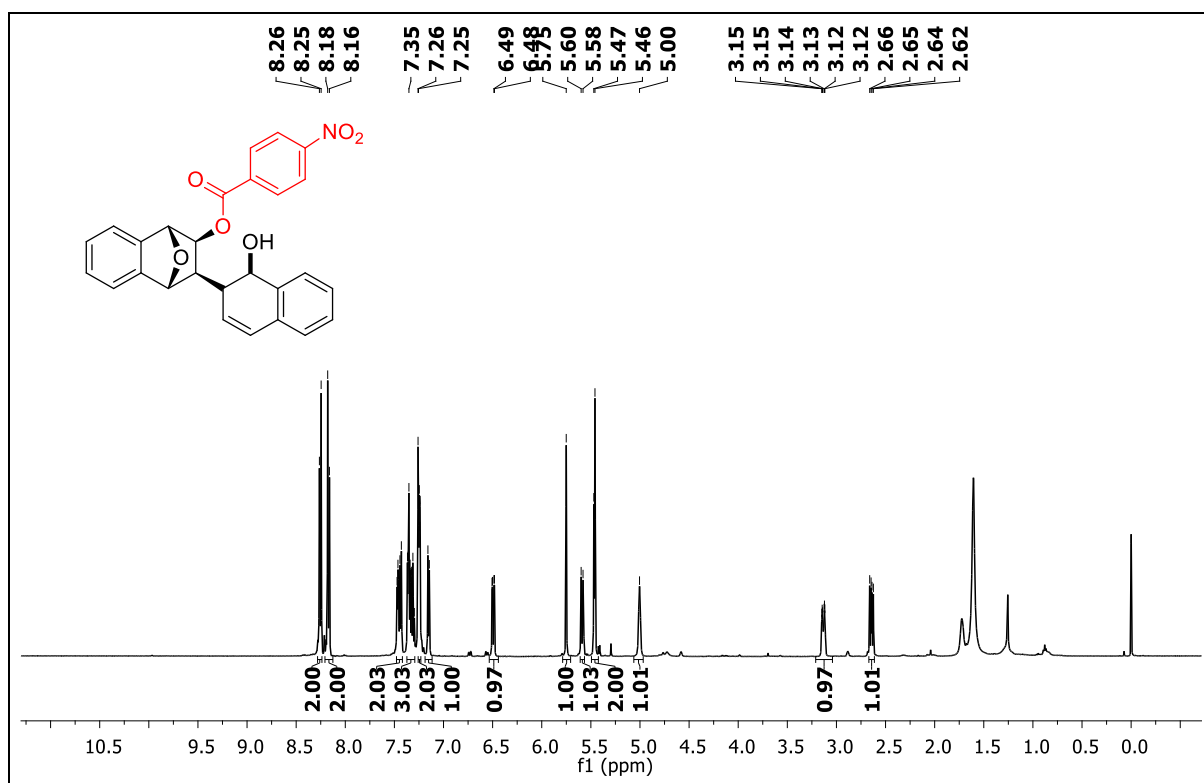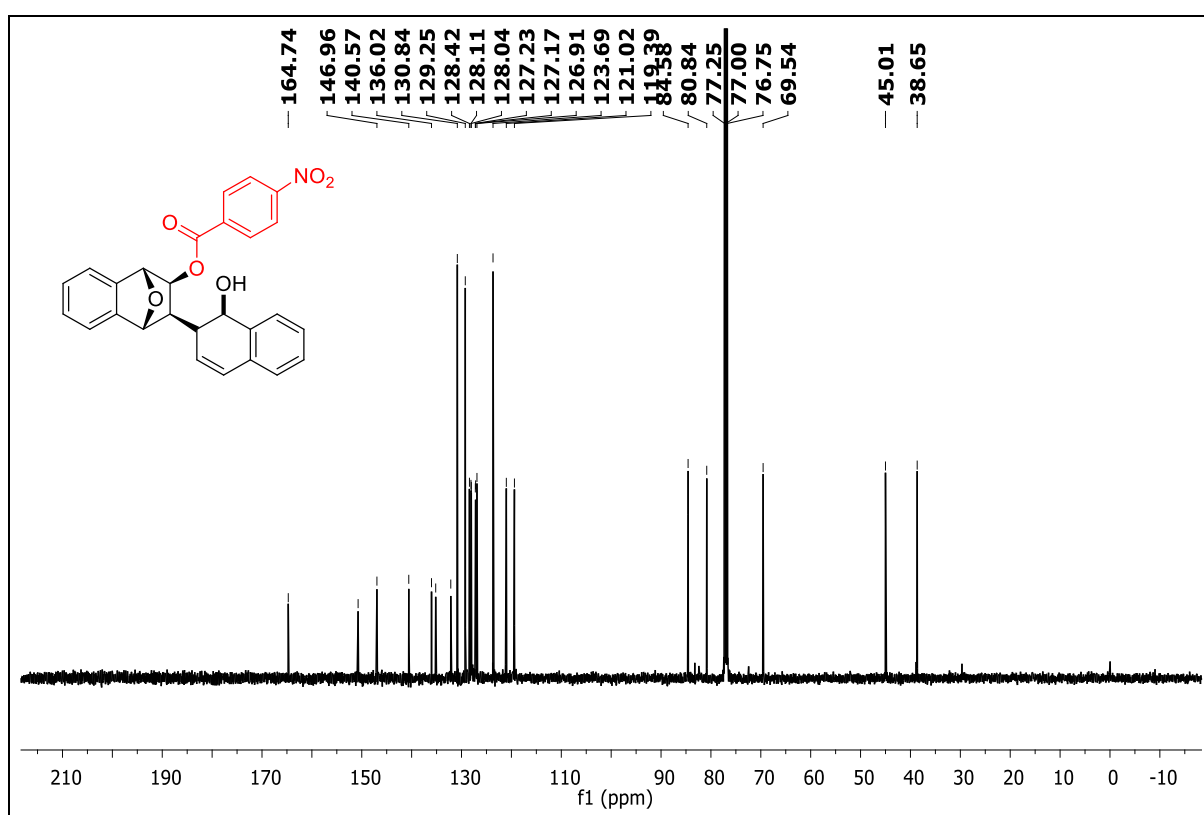

$^1\text{H}$  and  $^{13}\text{C}$  NMR Spectra of Compound **30a** ( $\text{CDCl}_3$ , 400 MHz)

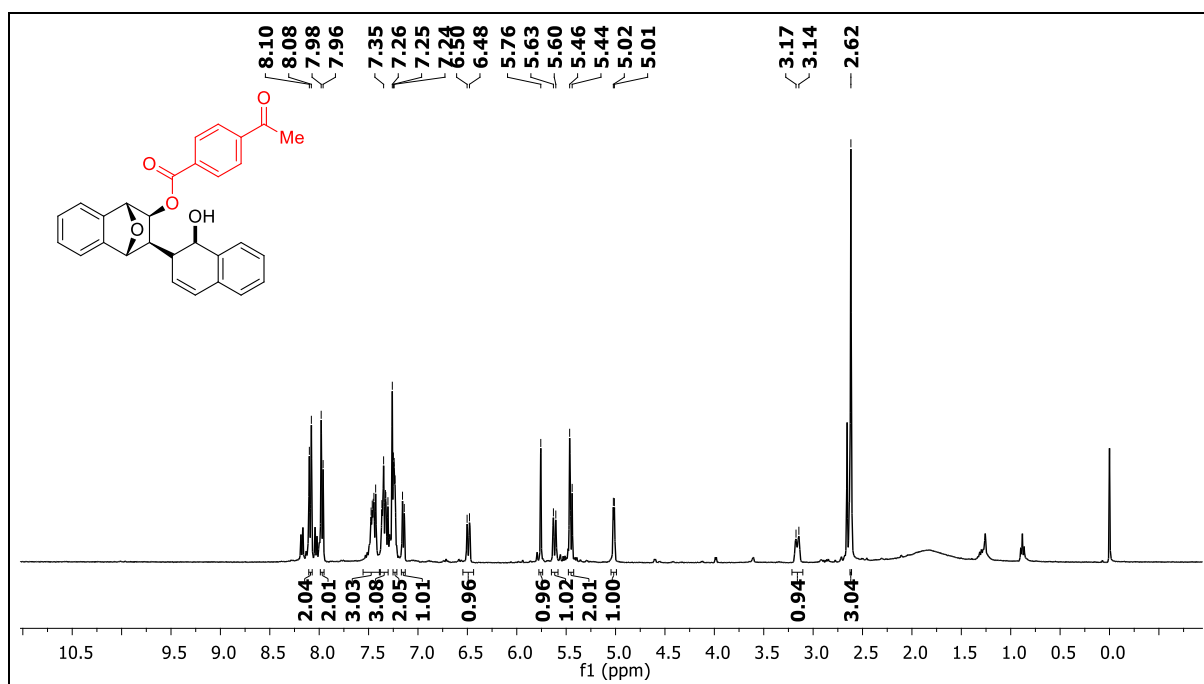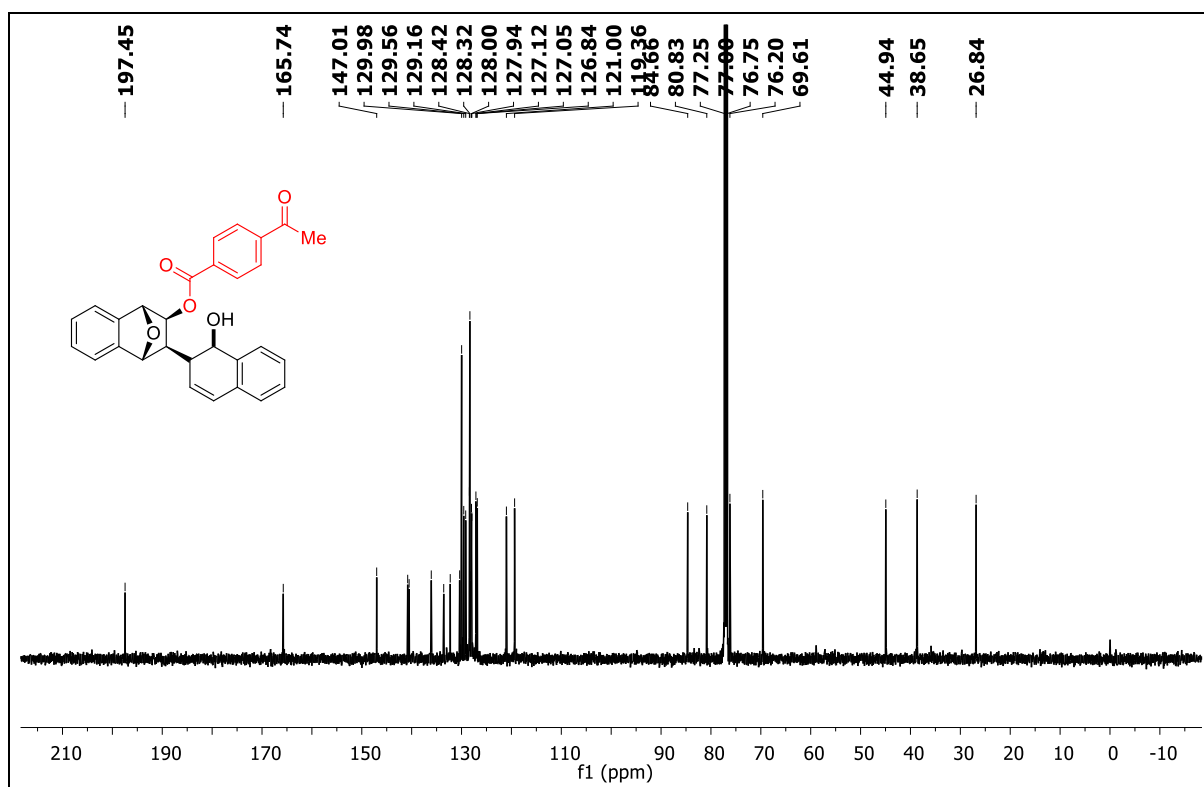

$^1\text{H}$  and  $^{13}\text{C}$  NMR Spectra of Compound **3pa** ( $\text{CDCl}_3$ , 400 MHz)

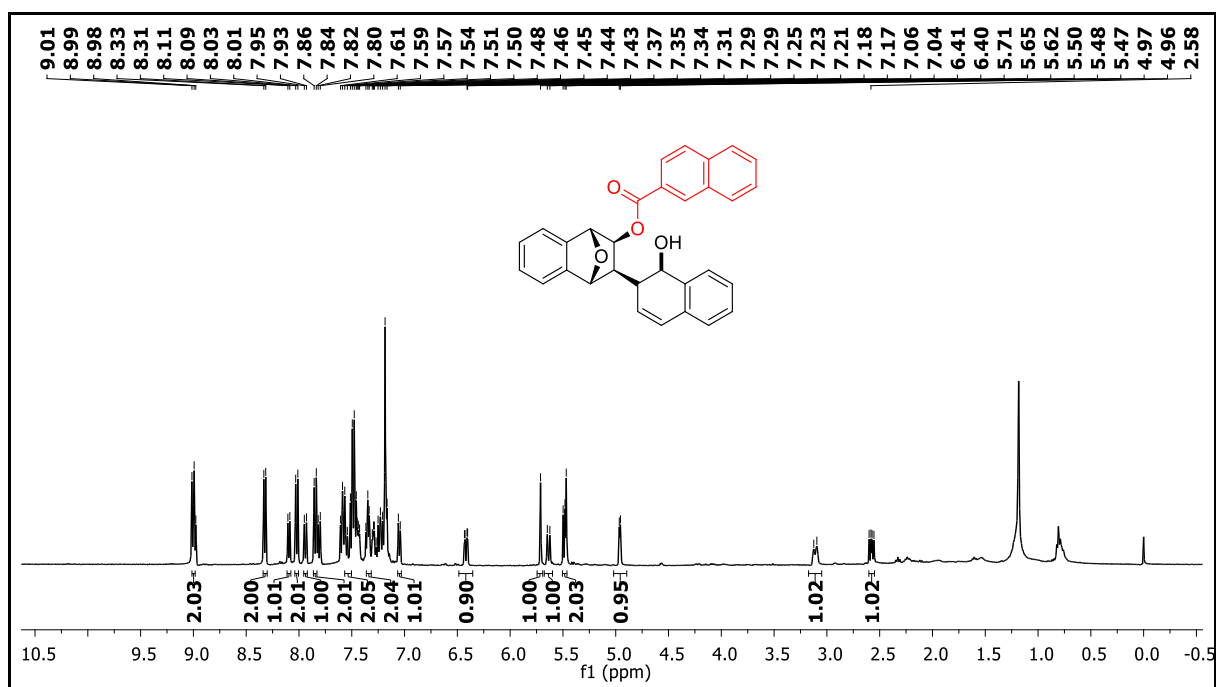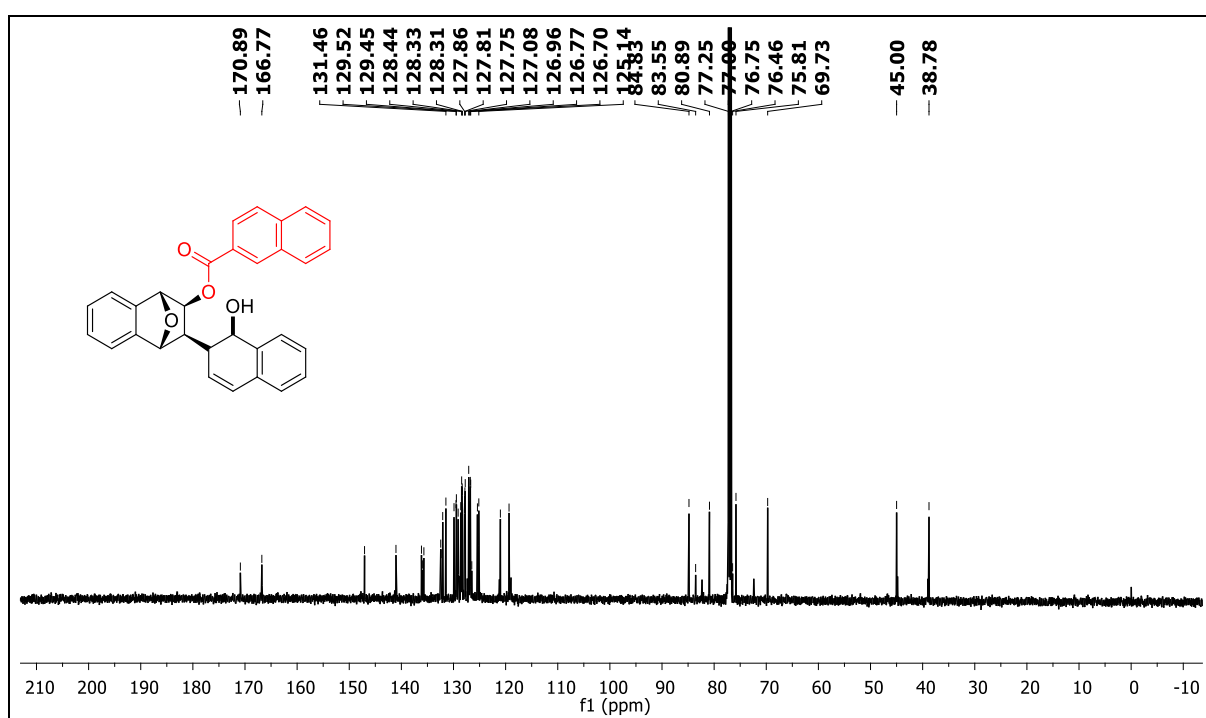



$^1\text{H}$  and  $^{13}\text{C}$  NMR Spectra of Compound **3qa** ( $\text{CDCl}_3$ , 400 MHz)

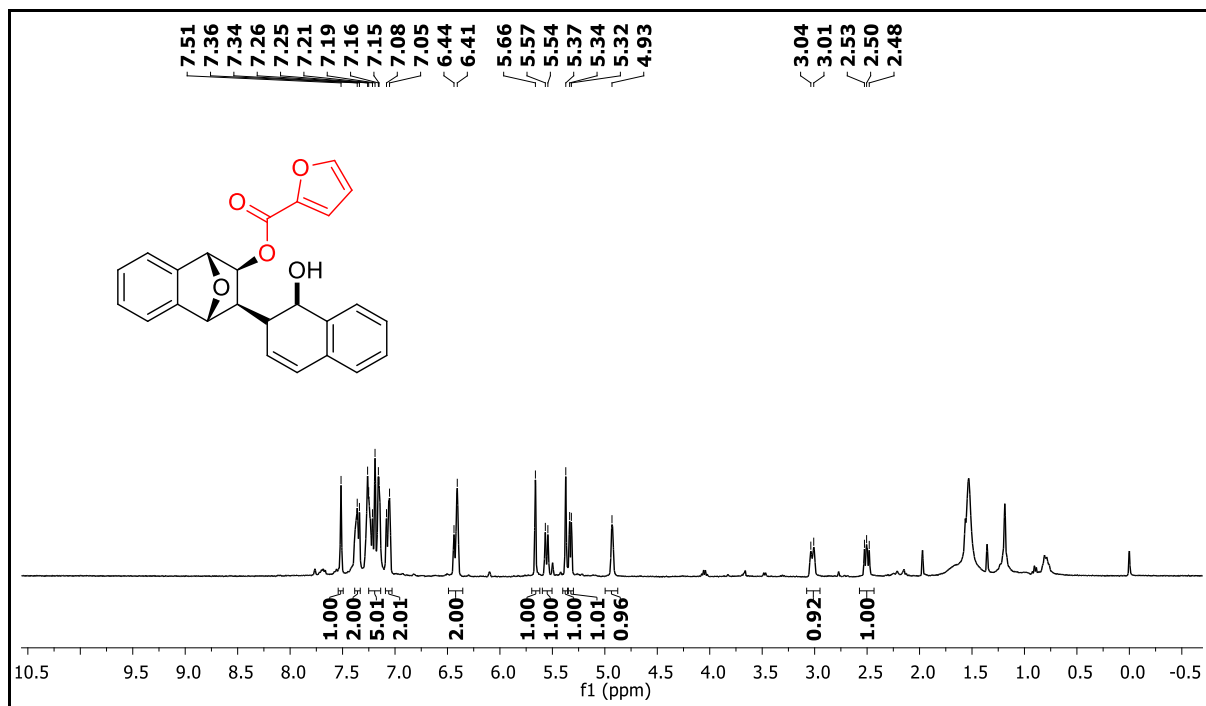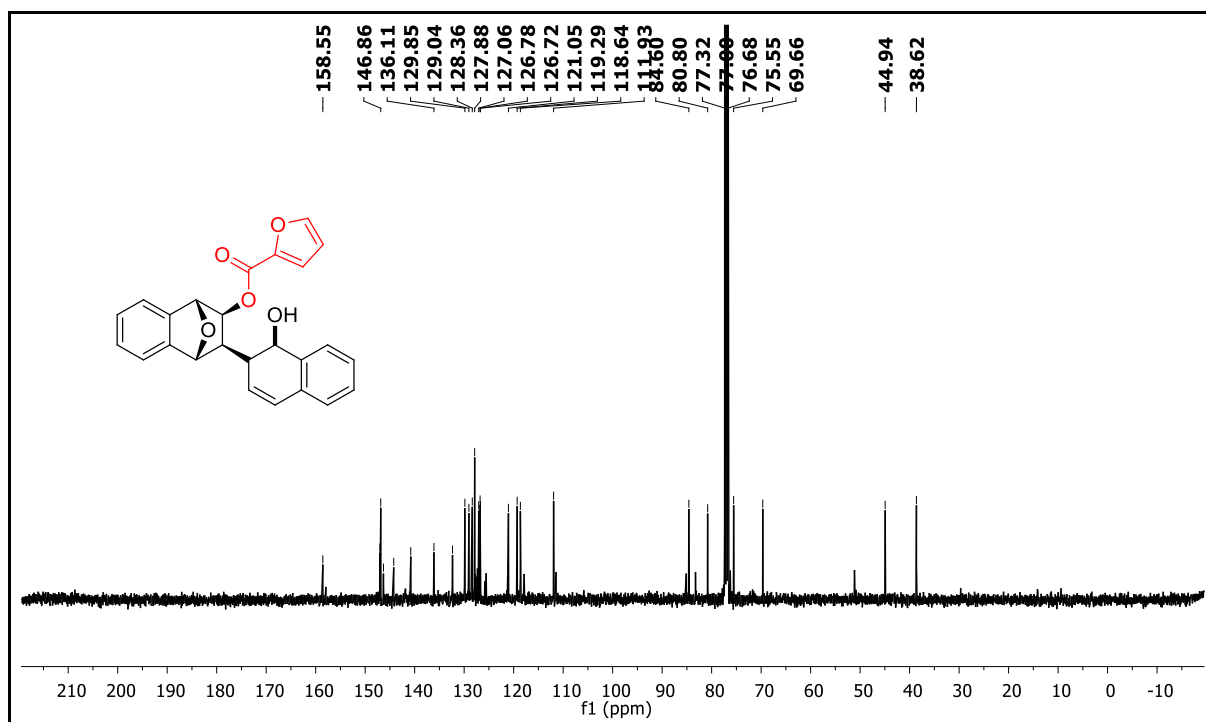

$^1\text{H}$  and  $^{13}\text{C}$  NMR Spectra of Compound **3ra** ( $\text{CDCl}_3$ , 400 MHz)

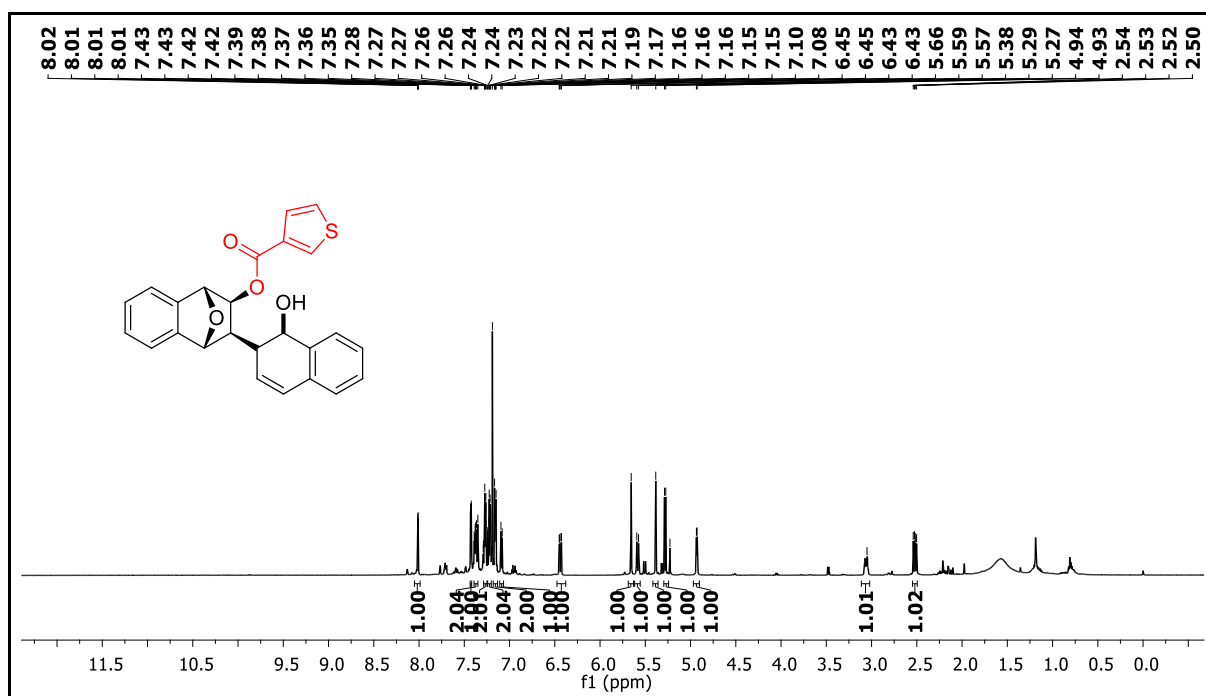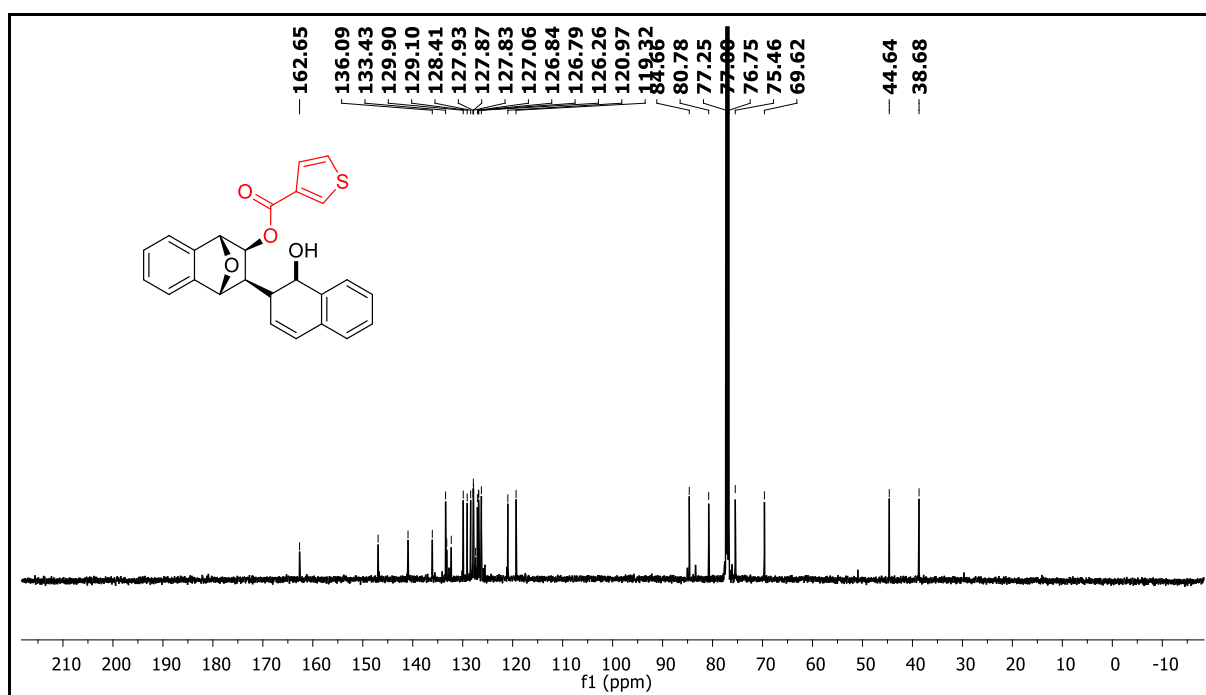

$^1\text{H}$  and  $^{13}\text{C}$  NMR Spectra of Compound **31b** ( $\text{CDCl}_3$ , 400 MHz)

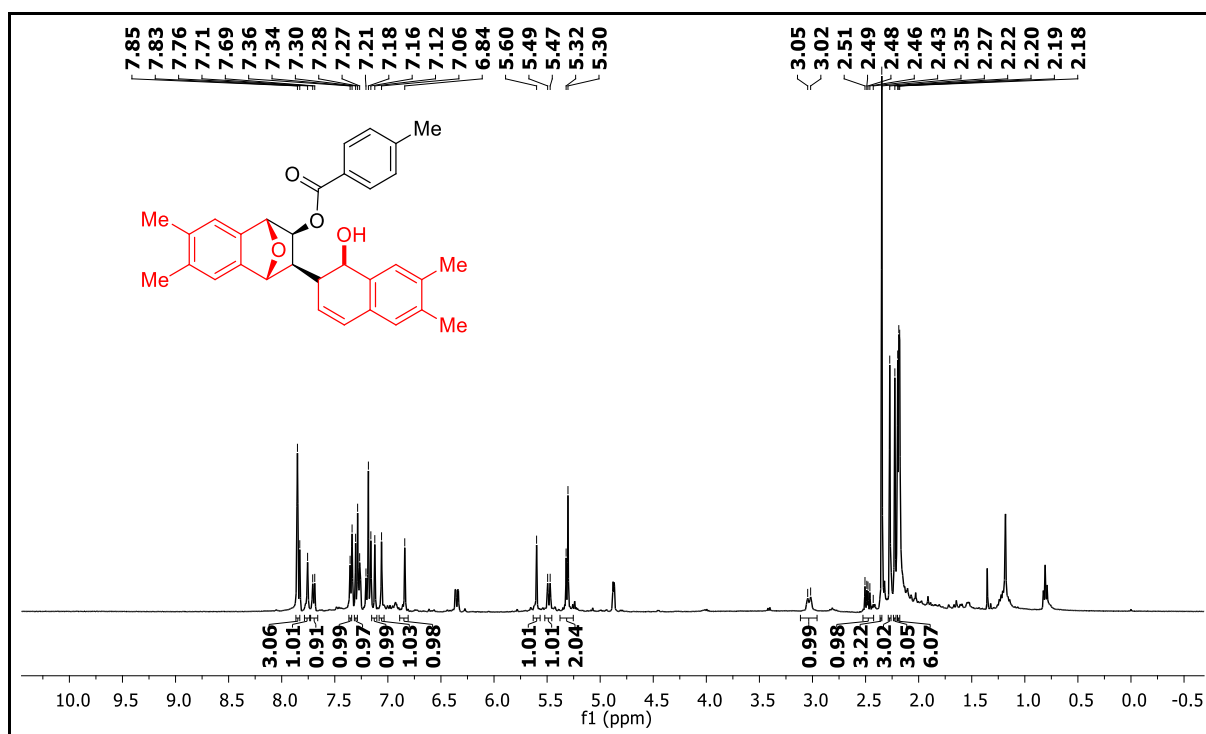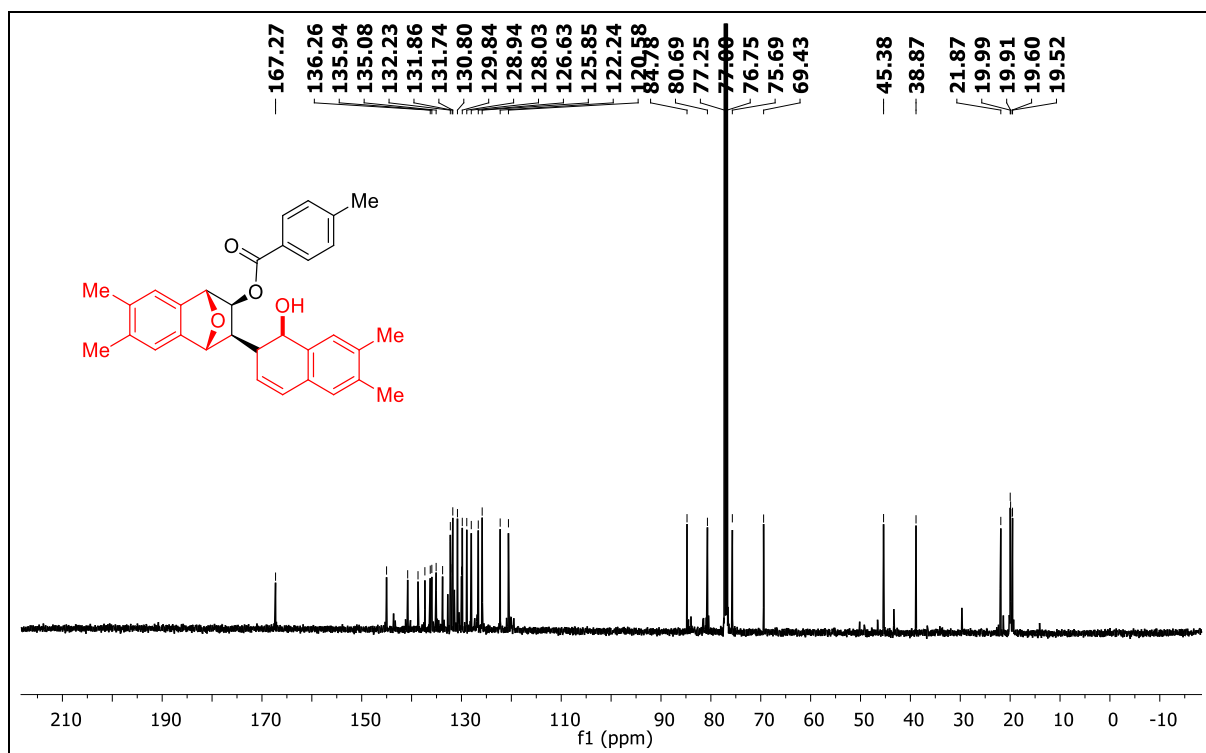

$^1\text{H}$  and  $^{13}\text{C}$  NMR Spectra of Compound **3nb** ( $\text{CDCl}_3$ , 400 MHz)

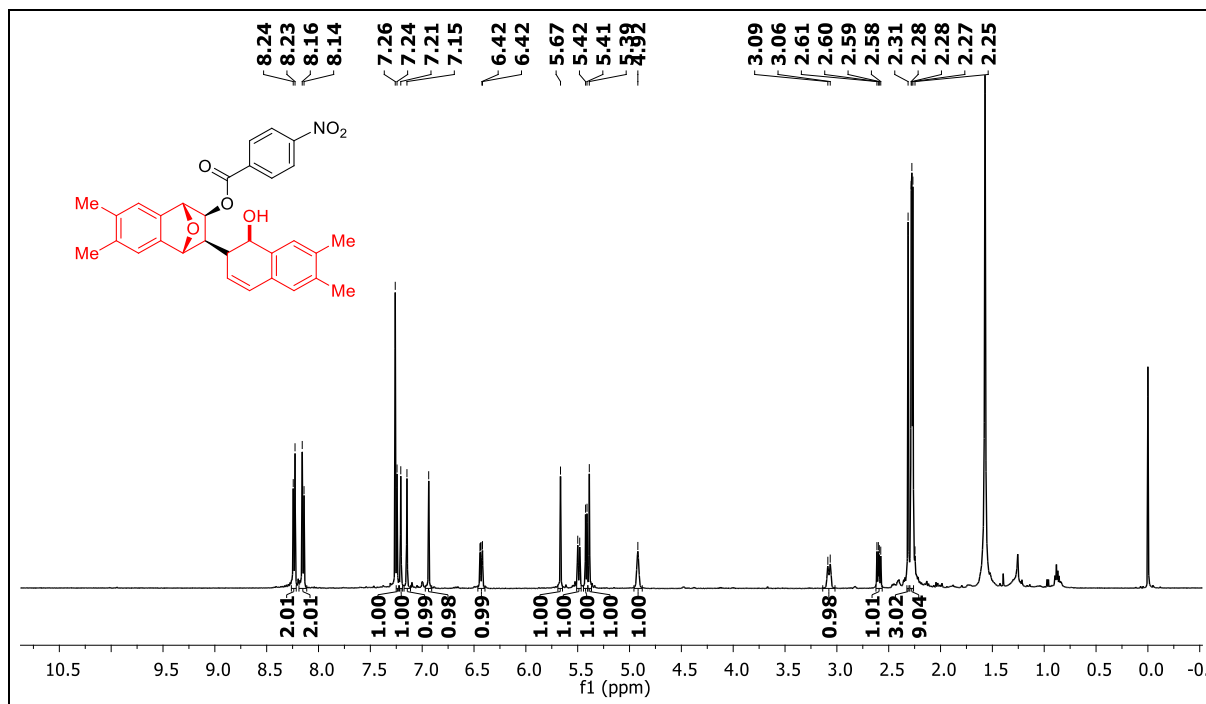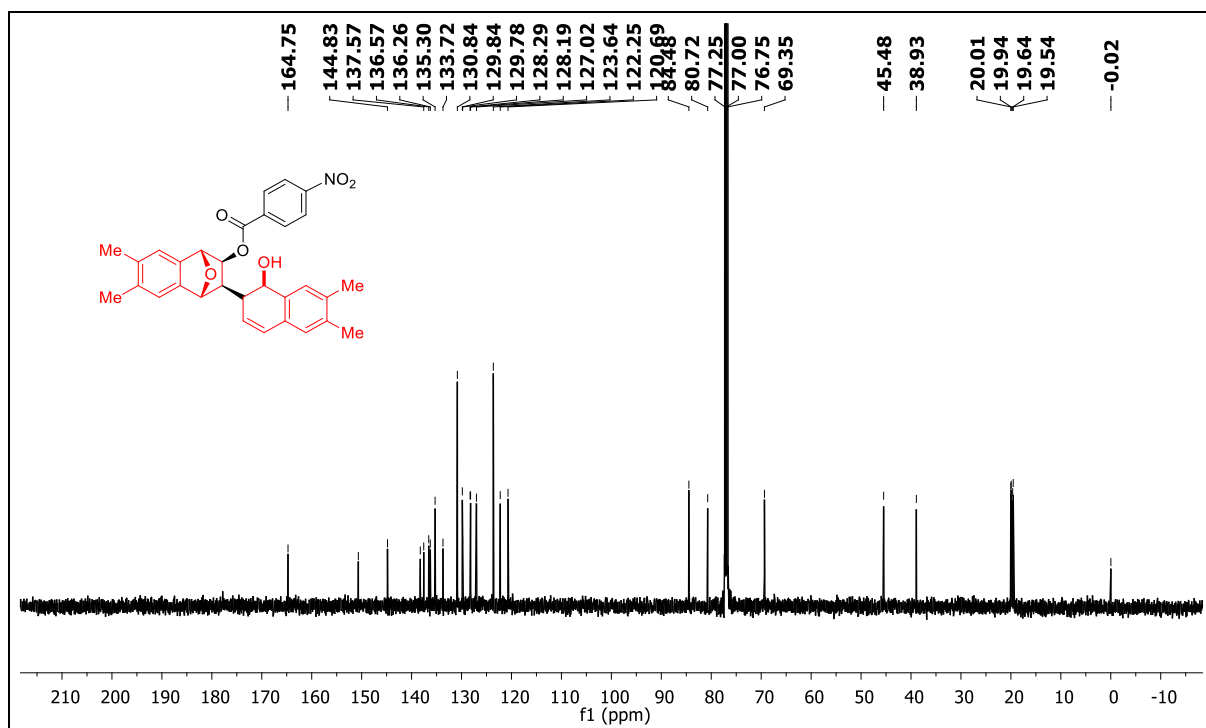

$^1\text{H}$  and  $^{13}\text{C}$  NMR Spectra of Compound **3rb** ( $\text{CDCl}_3$ , 400 MHz)

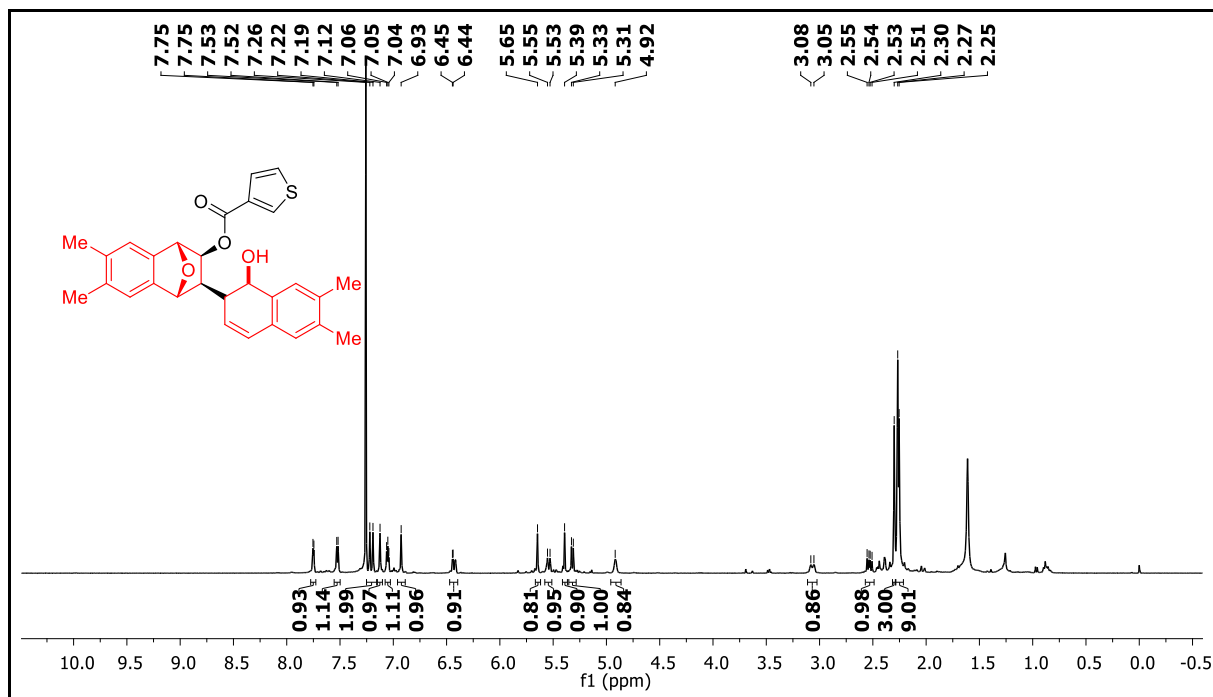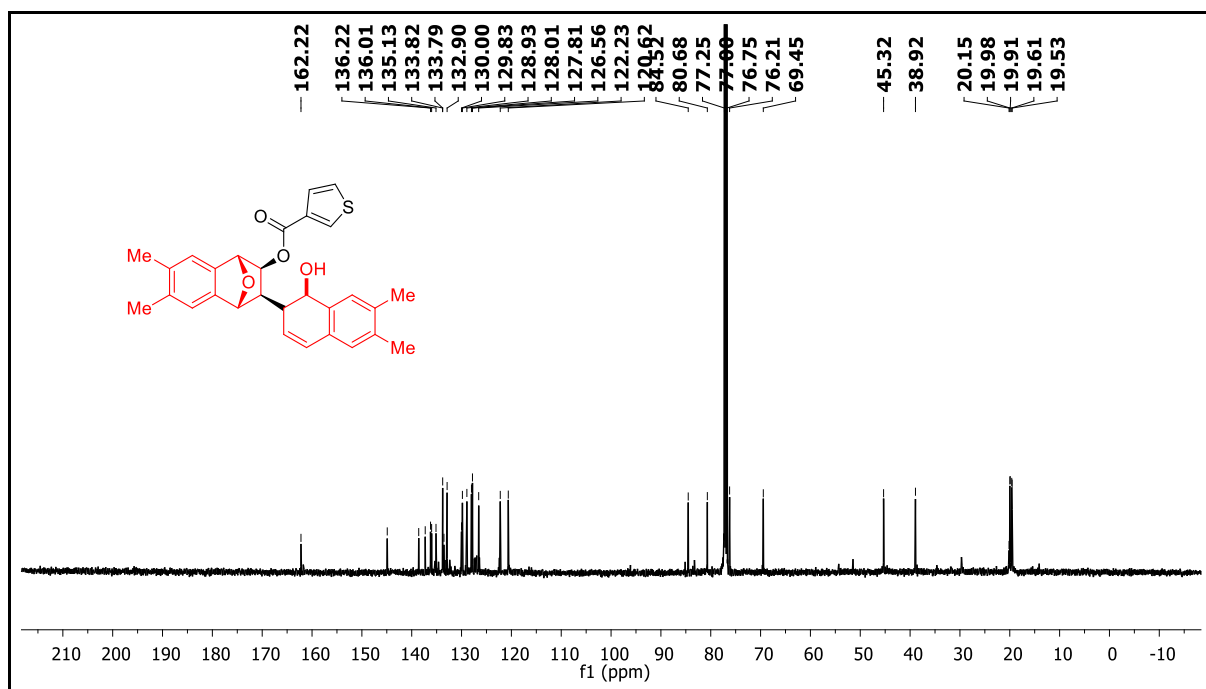

$^1\text{H}$  and  $^{13}\text{C}$  NMR Spectra of Compound **3qc** ( $\text{CDCl}_3$ , 400 MHz)

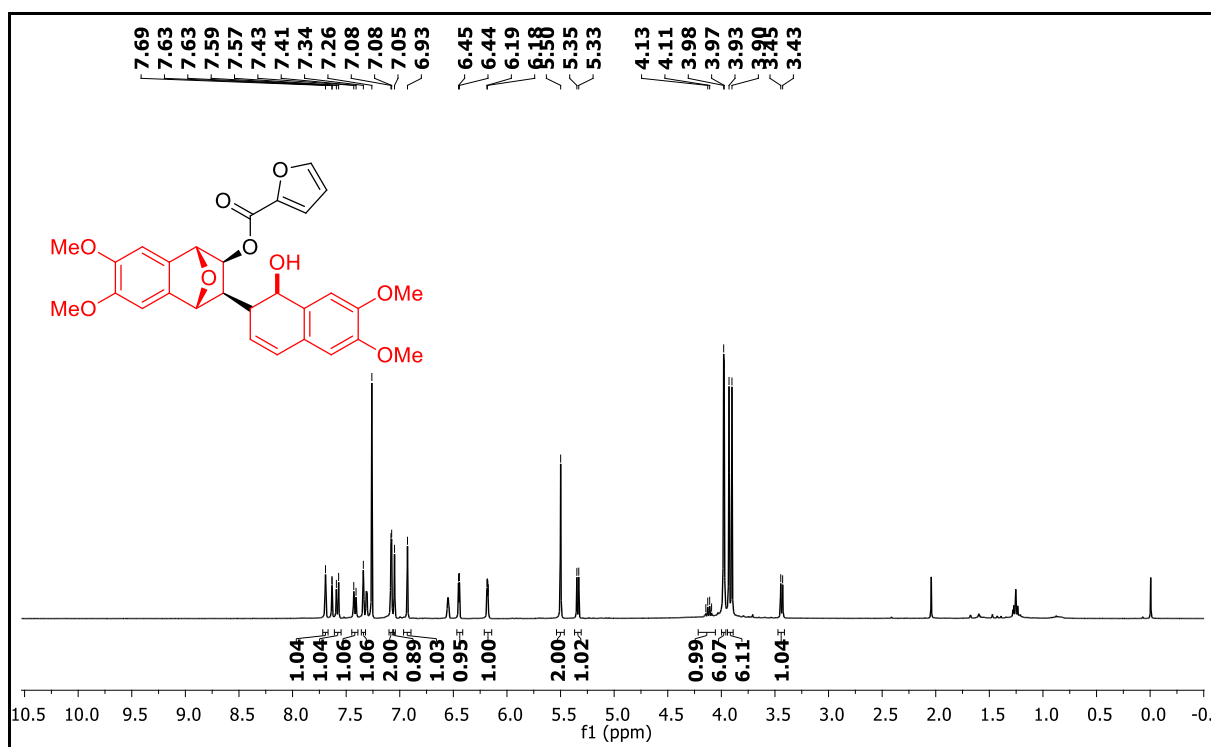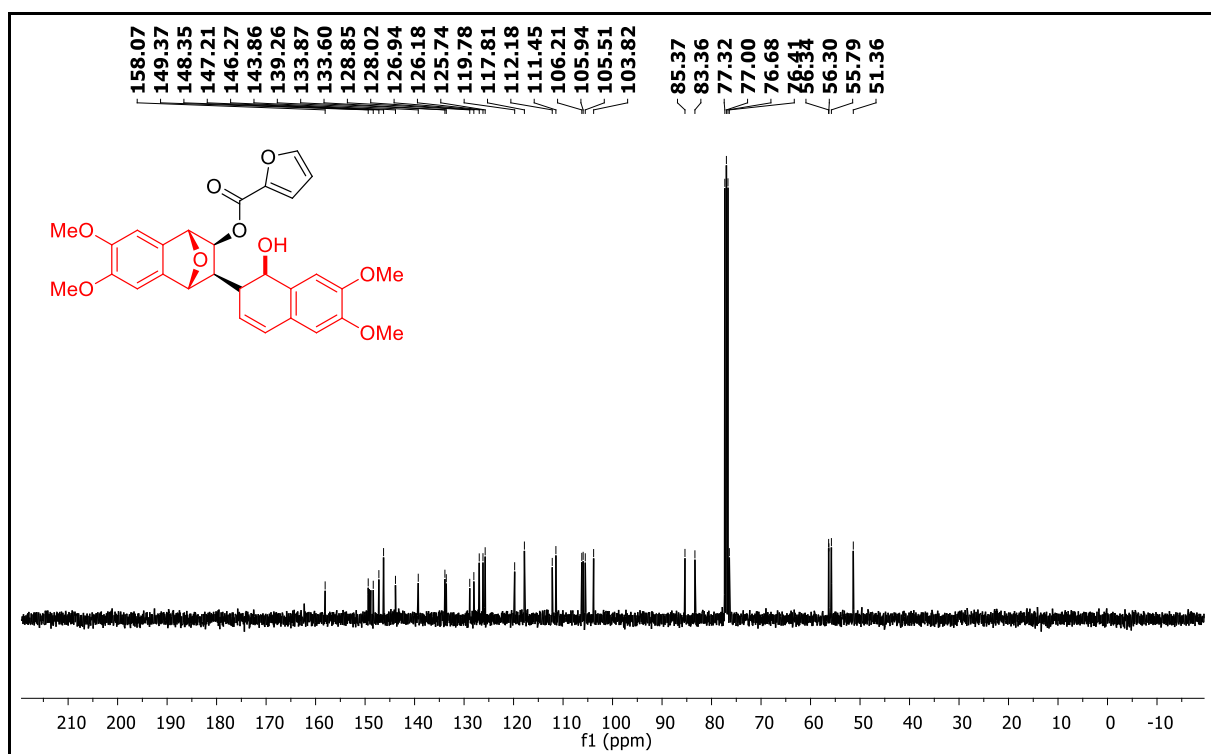

$^1\text{H}$  and  $^{13}\text{C}$  NMR Spectra of Compound **3rc** ( $\text{CDCl}_3$ , 400 MHz)

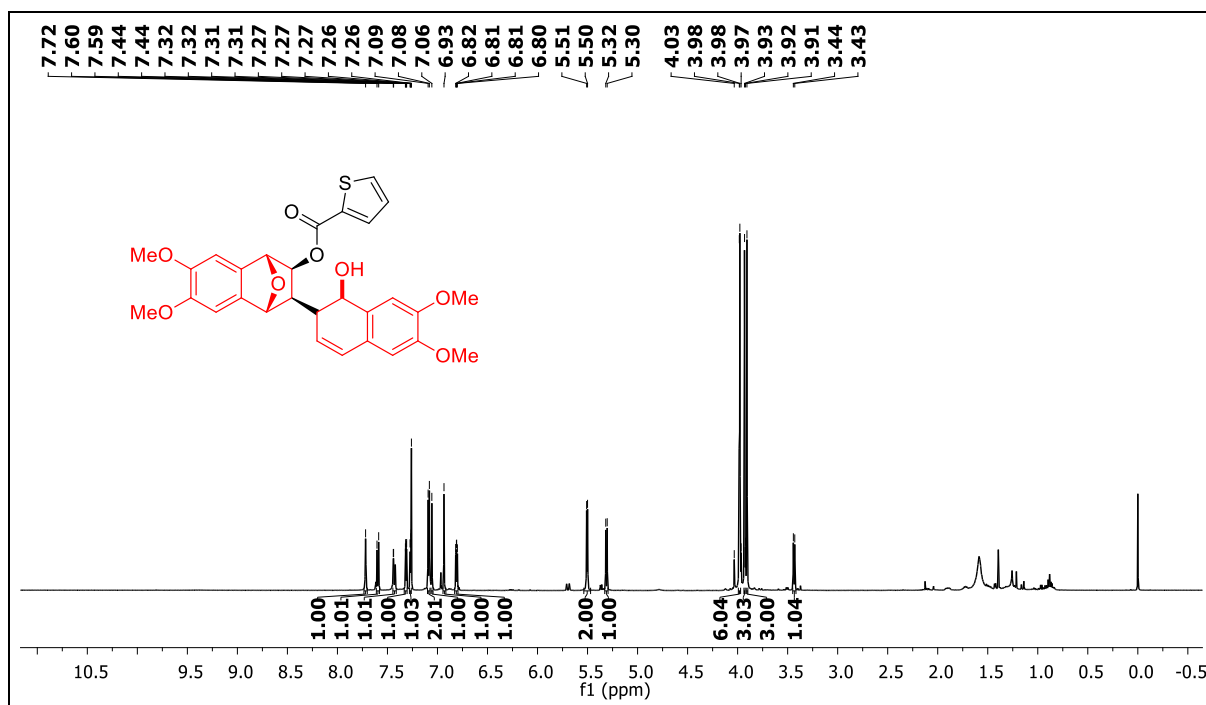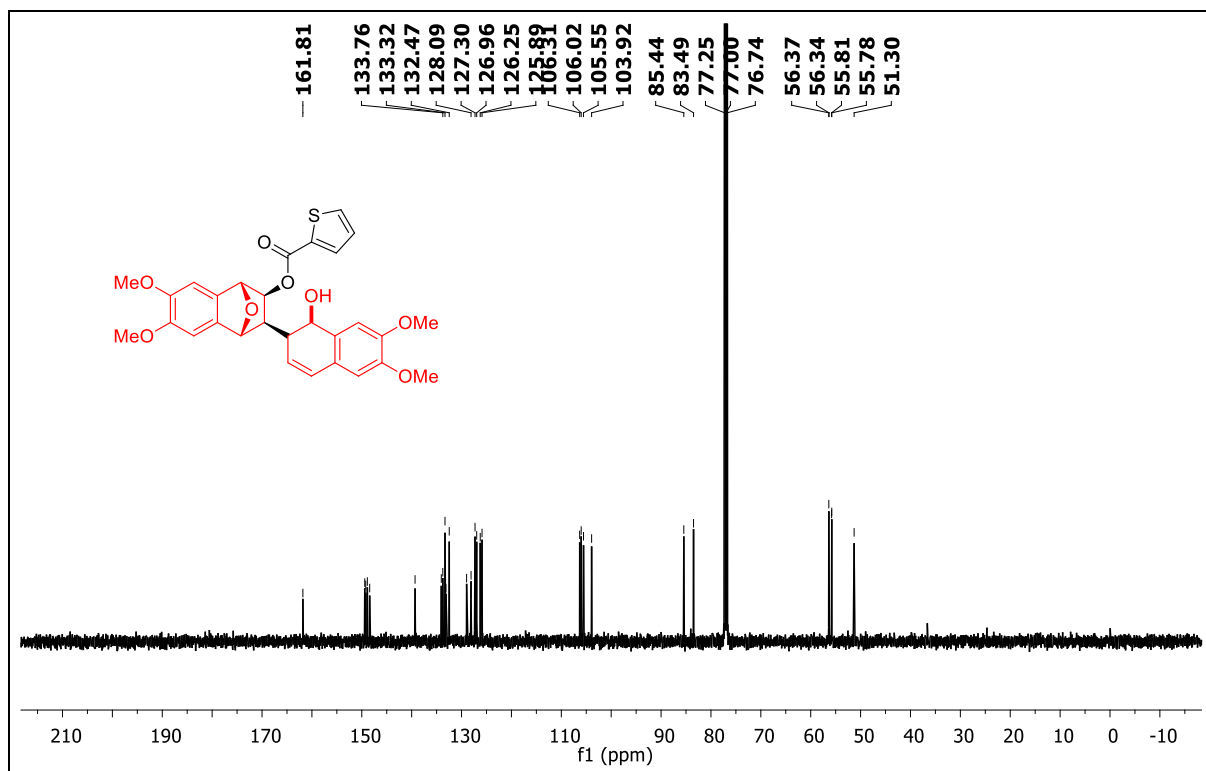

$^1\text{H}$  and  $^{13}\text{C}$  NMR Spectra of Compound **3lc** ( $\text{CDCl}_3$ , 400 MHz)

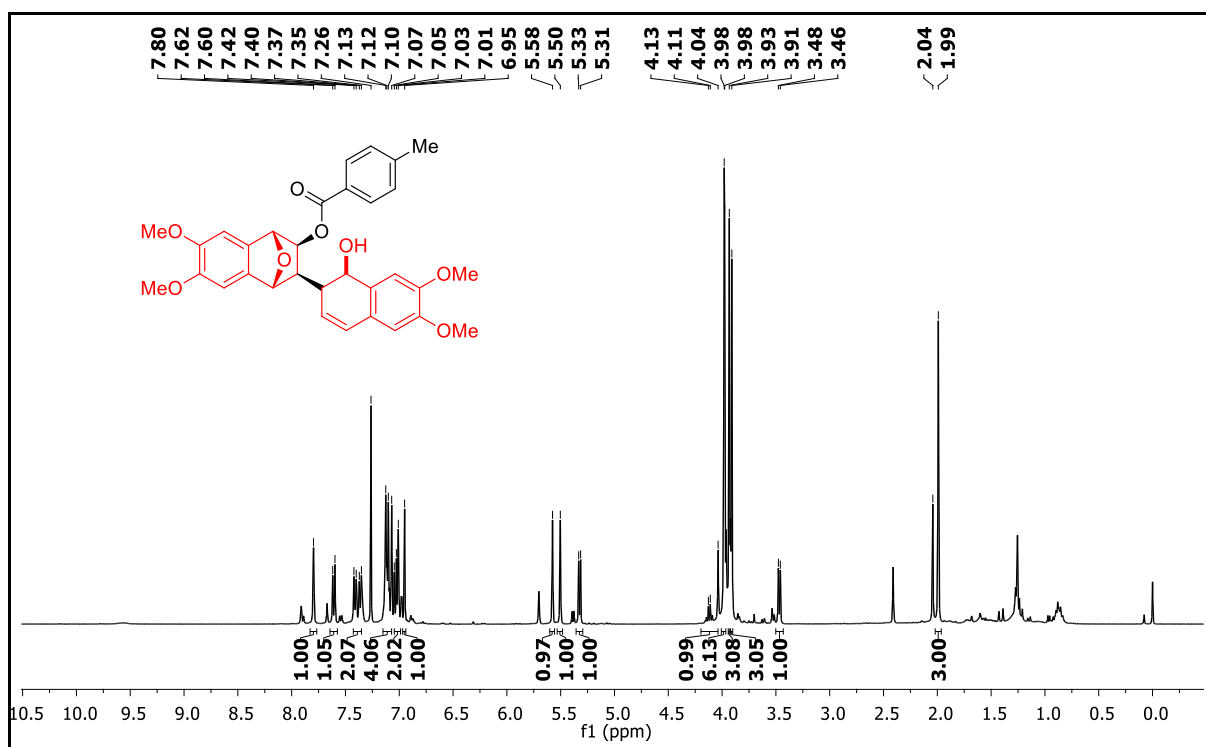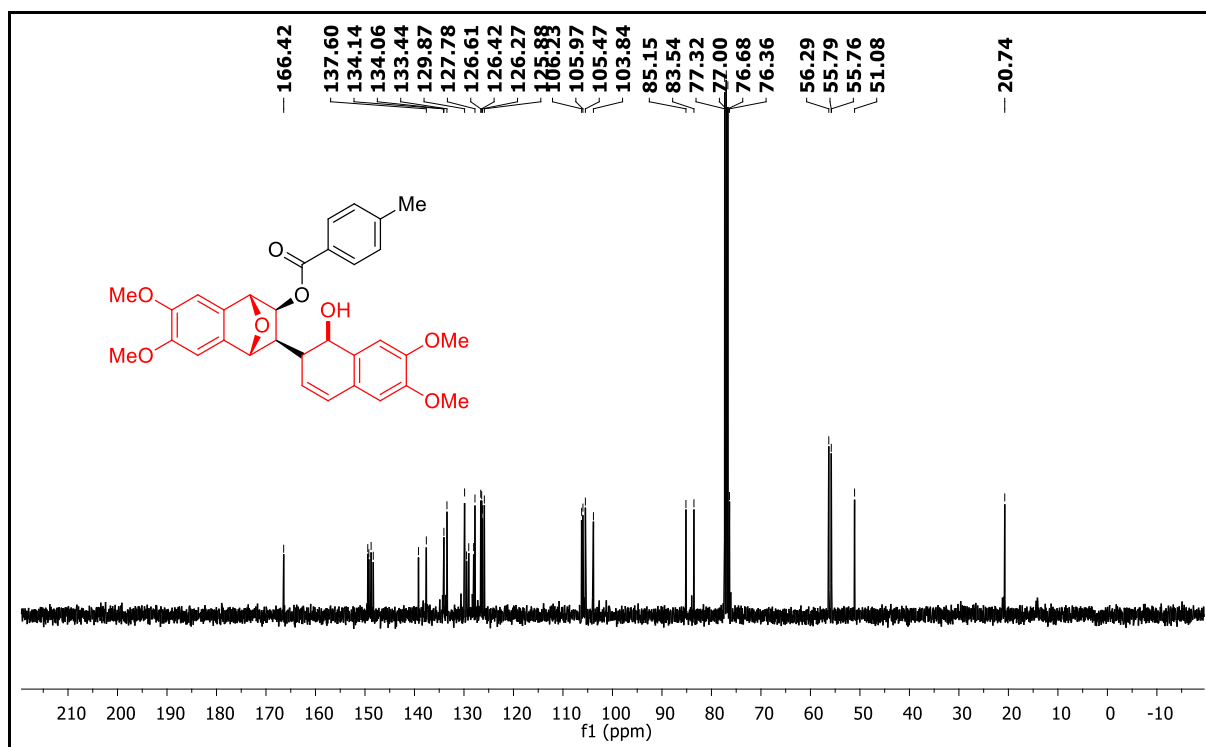



$^1\text{H}$  and  $^{13}\text{C}$  NMR Spectra of Compound **3qd** ( $\text{CDCl}_3$ , 400 MHz)

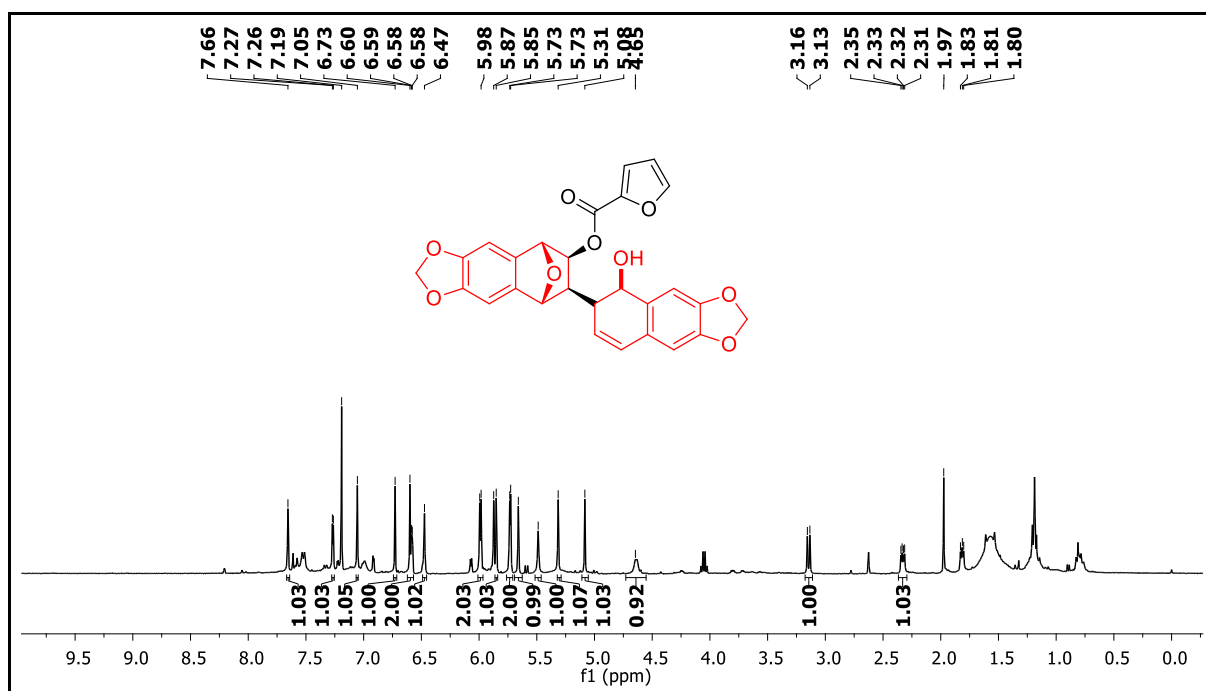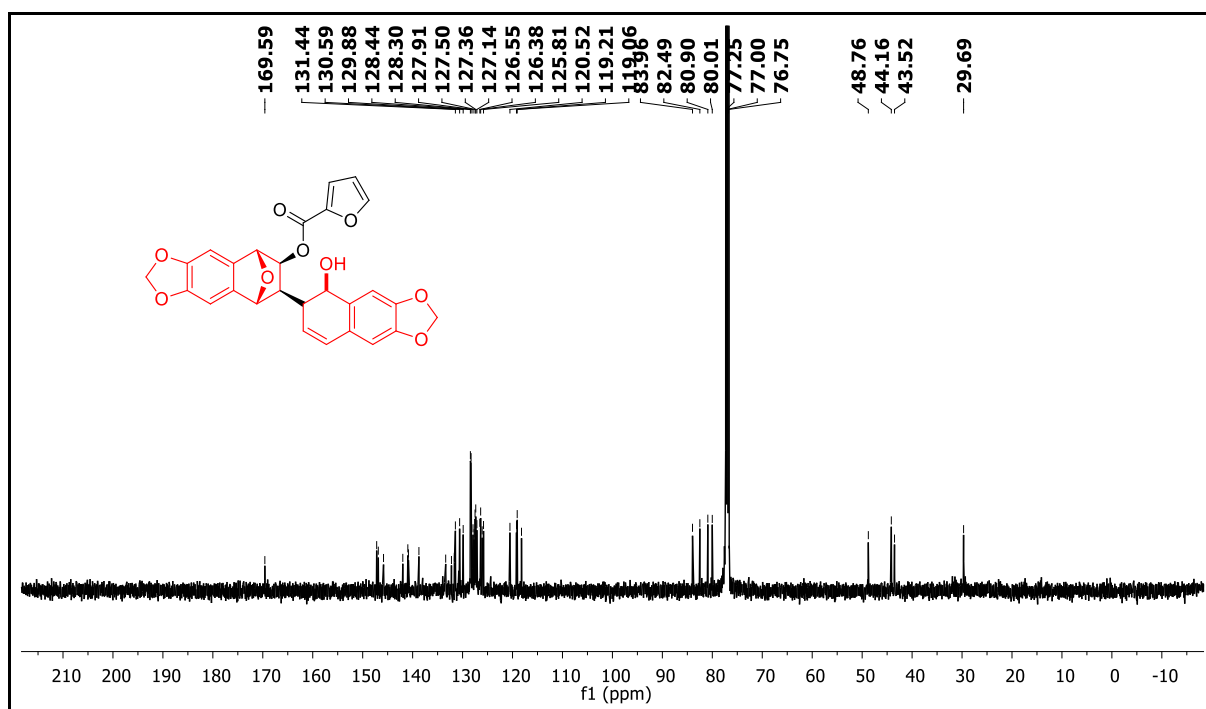

$^1\text{H}$  and  $^{13}\text{C}$  NMR Spectra of Compound **3oe** ( $\text{CDCl}_3$ , 400 MHz)

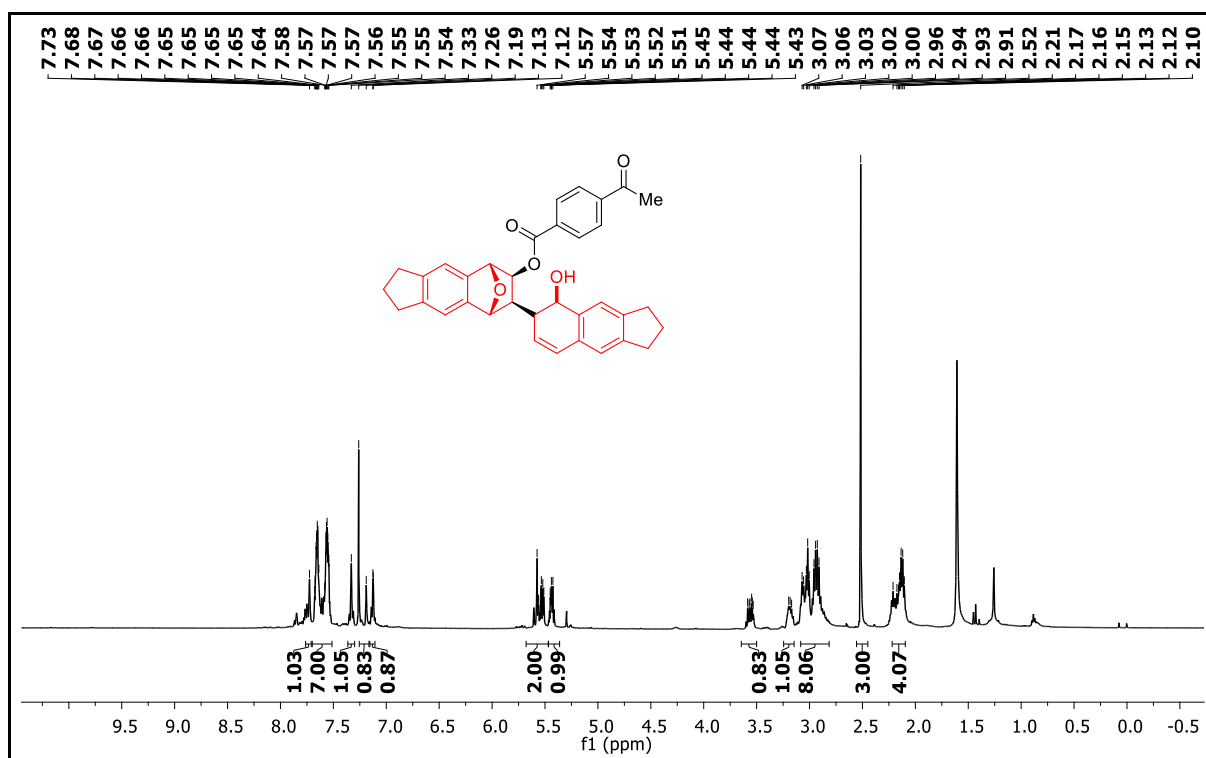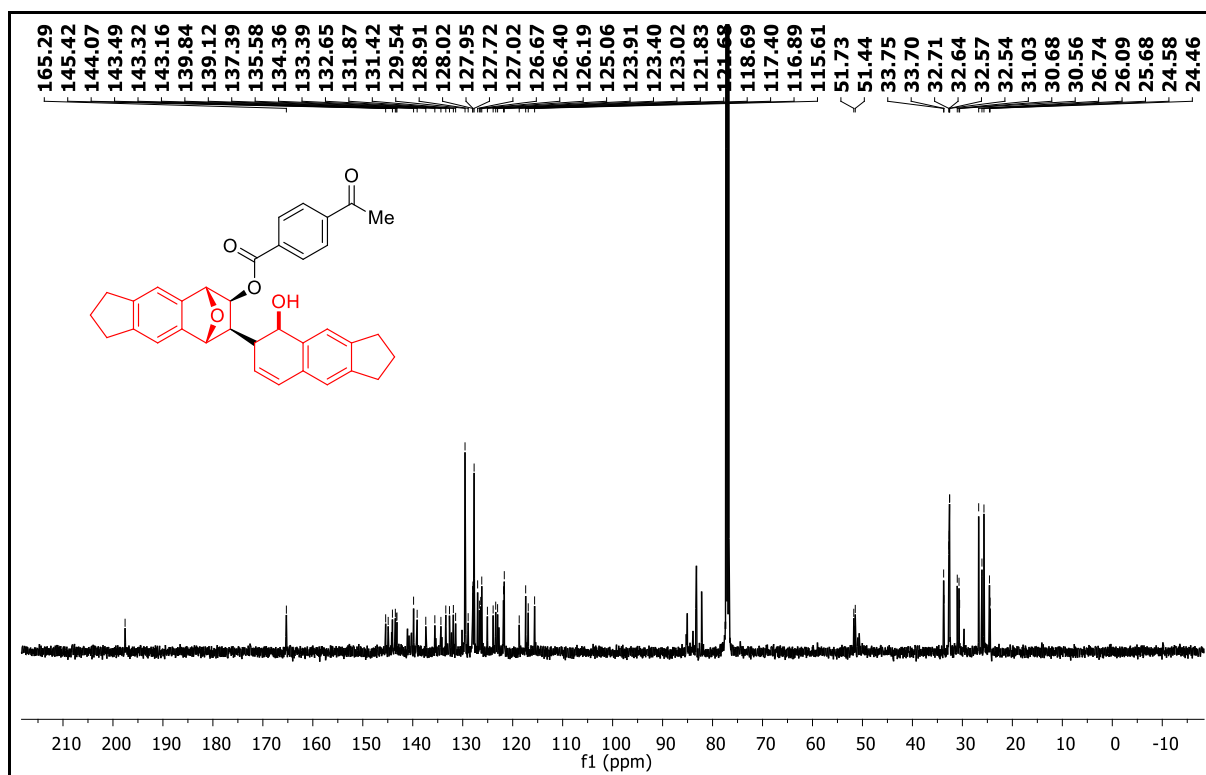

$^1\text{H}$  and  $^{13}\text{C}$  NMR Spectra of Compound **3ac** ( $\text{CDCl}_3$ , 400 MHz)

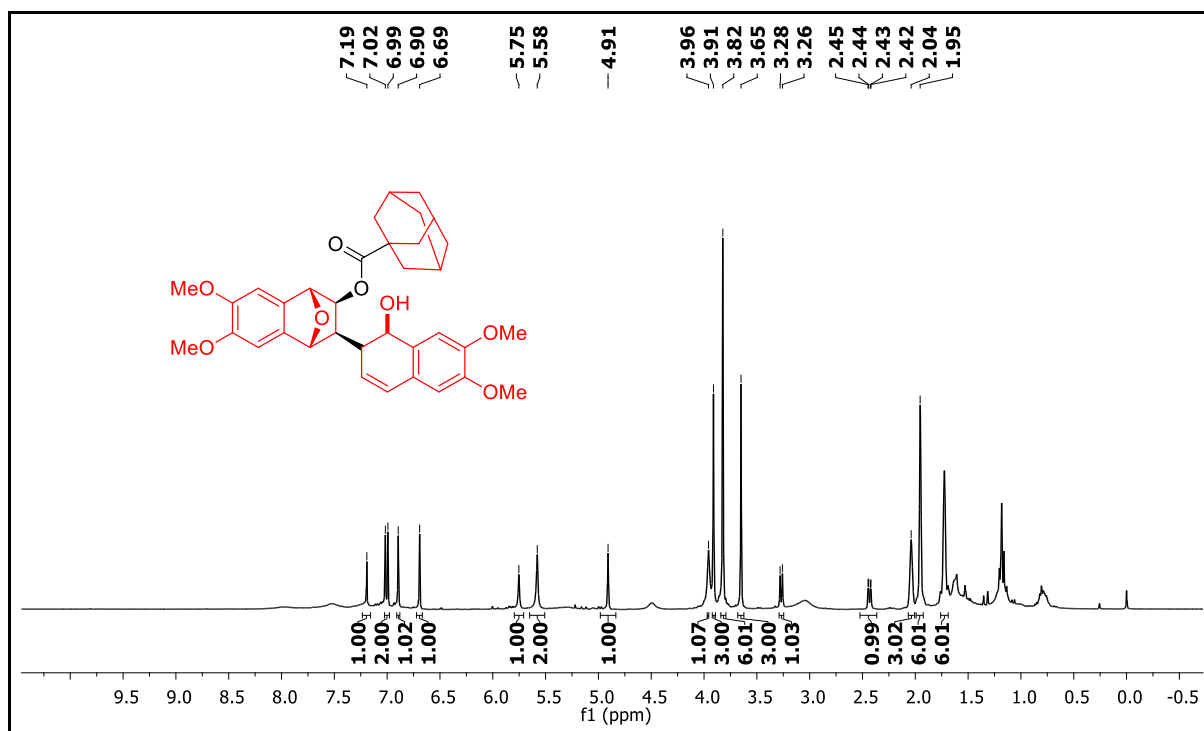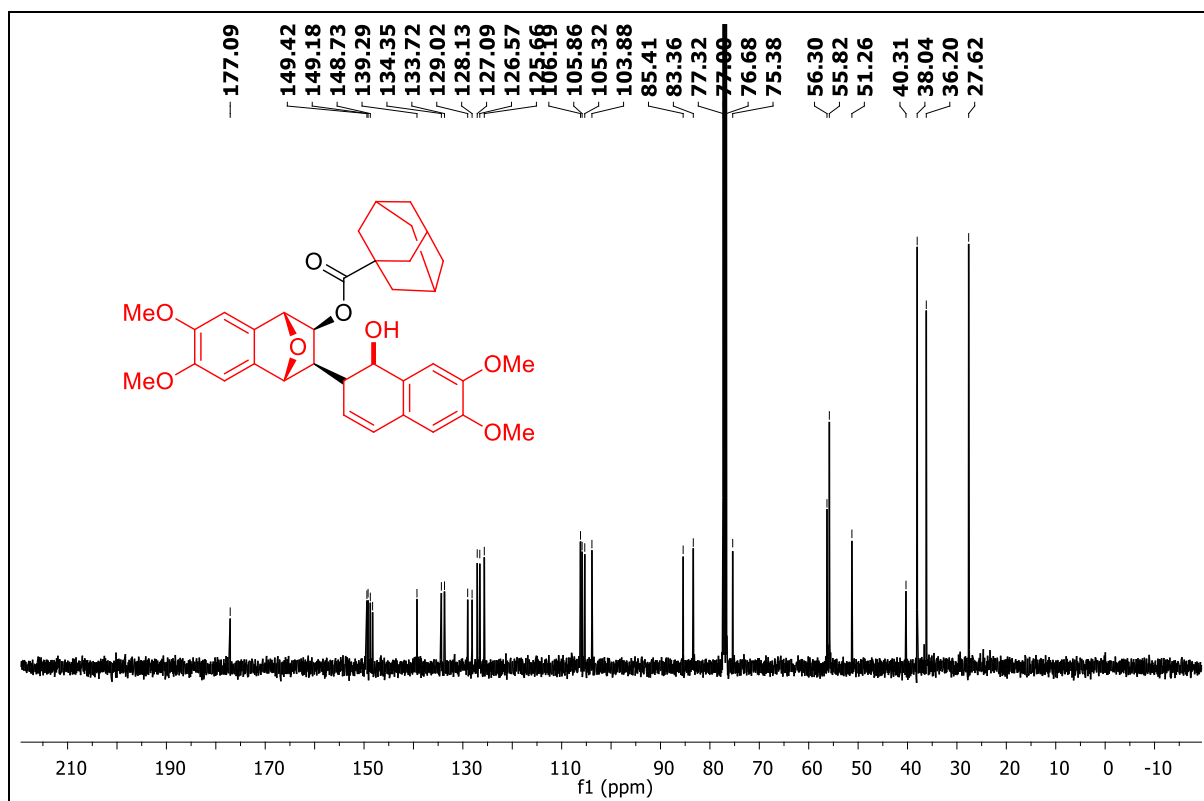

$^1\text{H}$  and  $^{13}\text{C}$  NMR Spectra of Compound **3cc** ( $\text{CDCl}_3$ , 400 MHz)

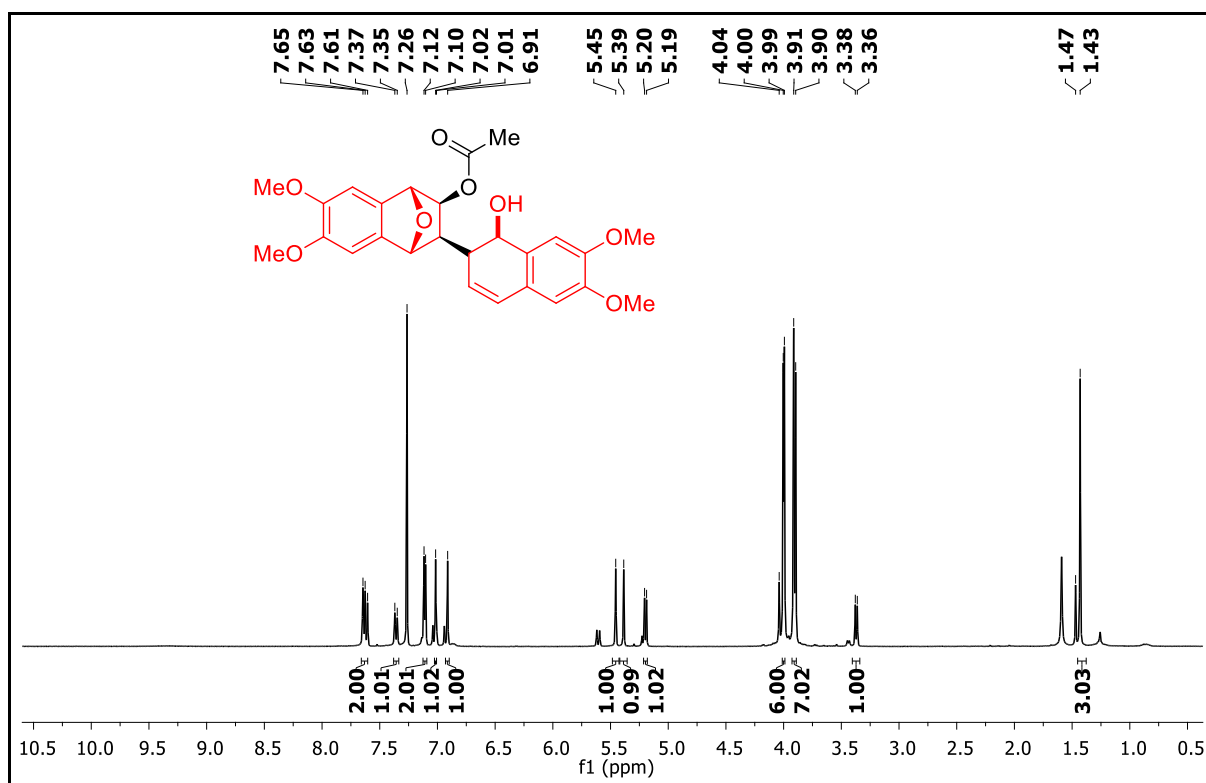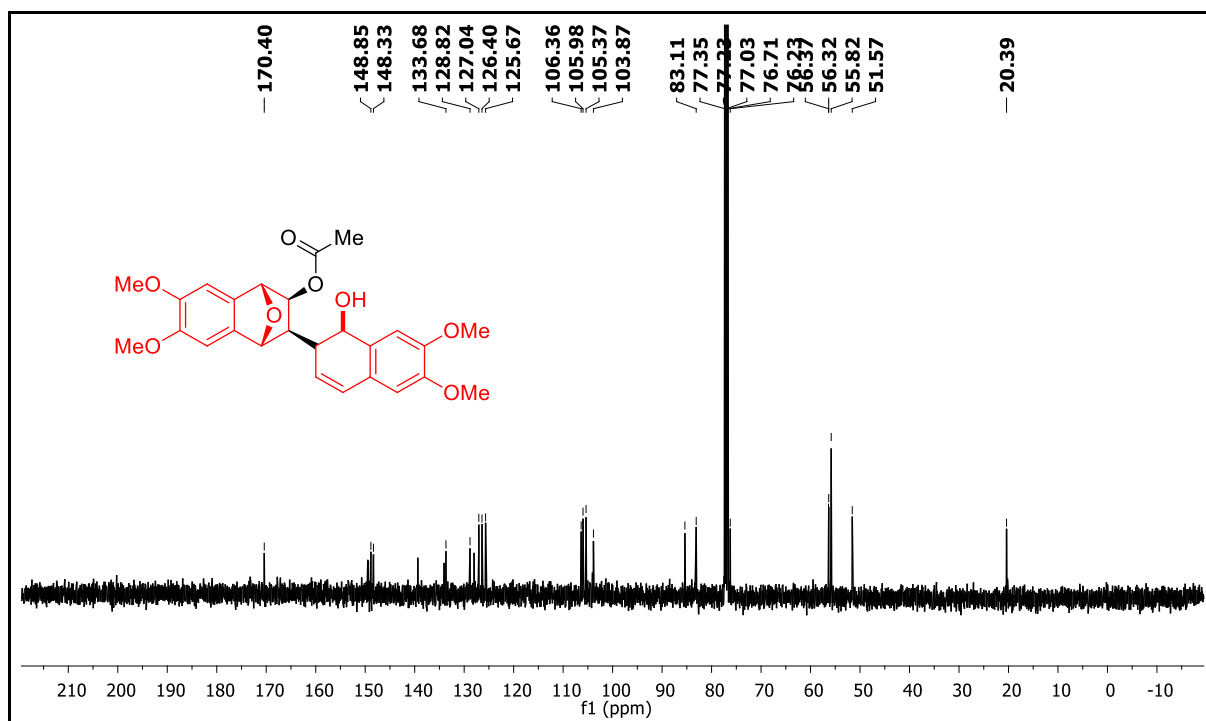

$^1\text{H}$  and  $^{13}\text{C}$  NMR Spectra of Compound **3ce** ( $\text{CDCl}_3$ , 400 MHz)

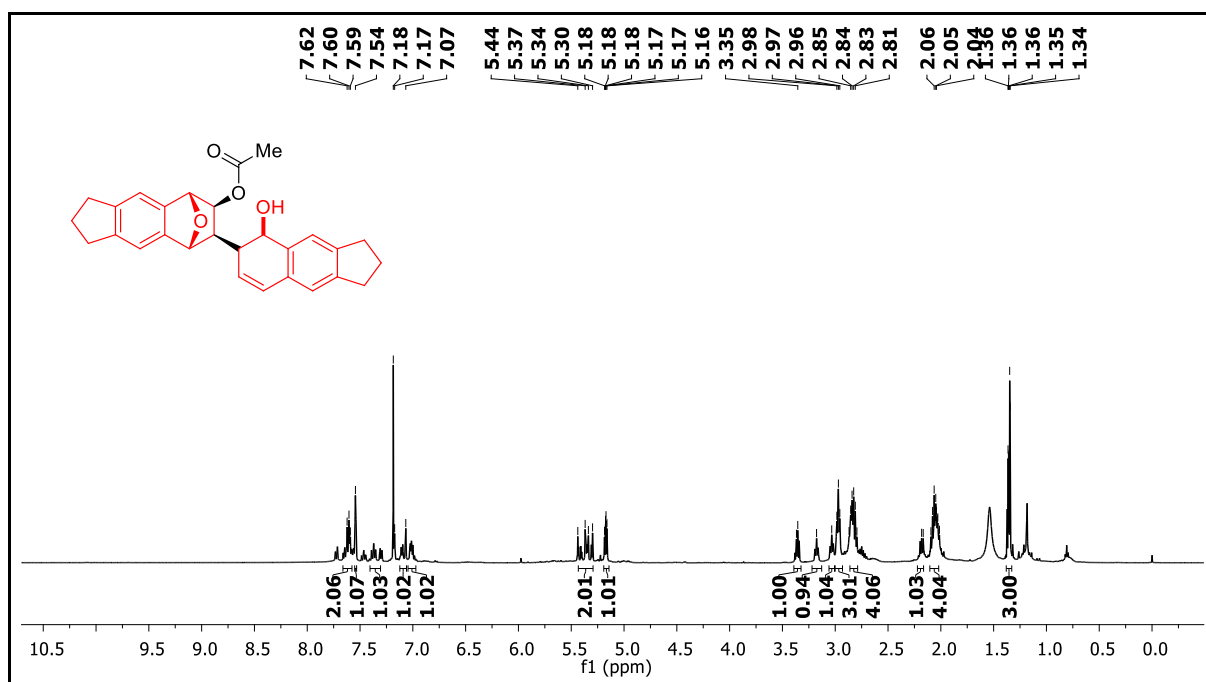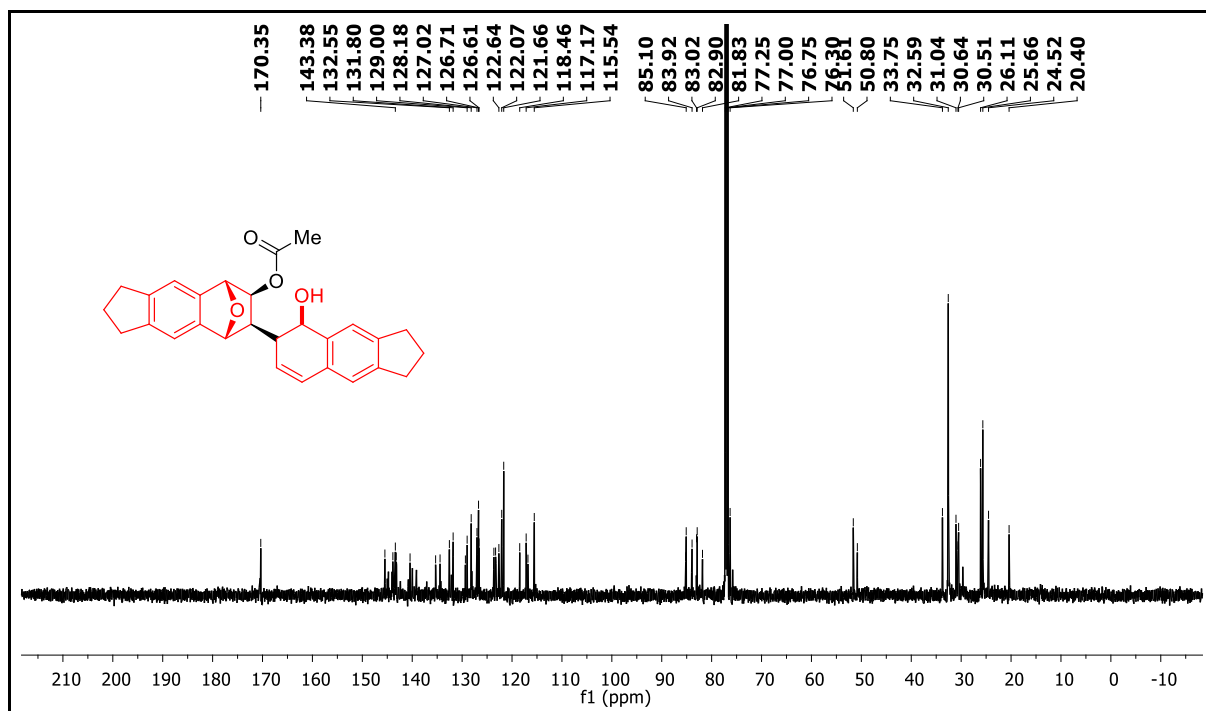

$^1\text{H}$  and  $^{13}\text{C}$  NMR Spectra of Compound **3df** ( $\text{CDCl}_3$ , 400 MHz)

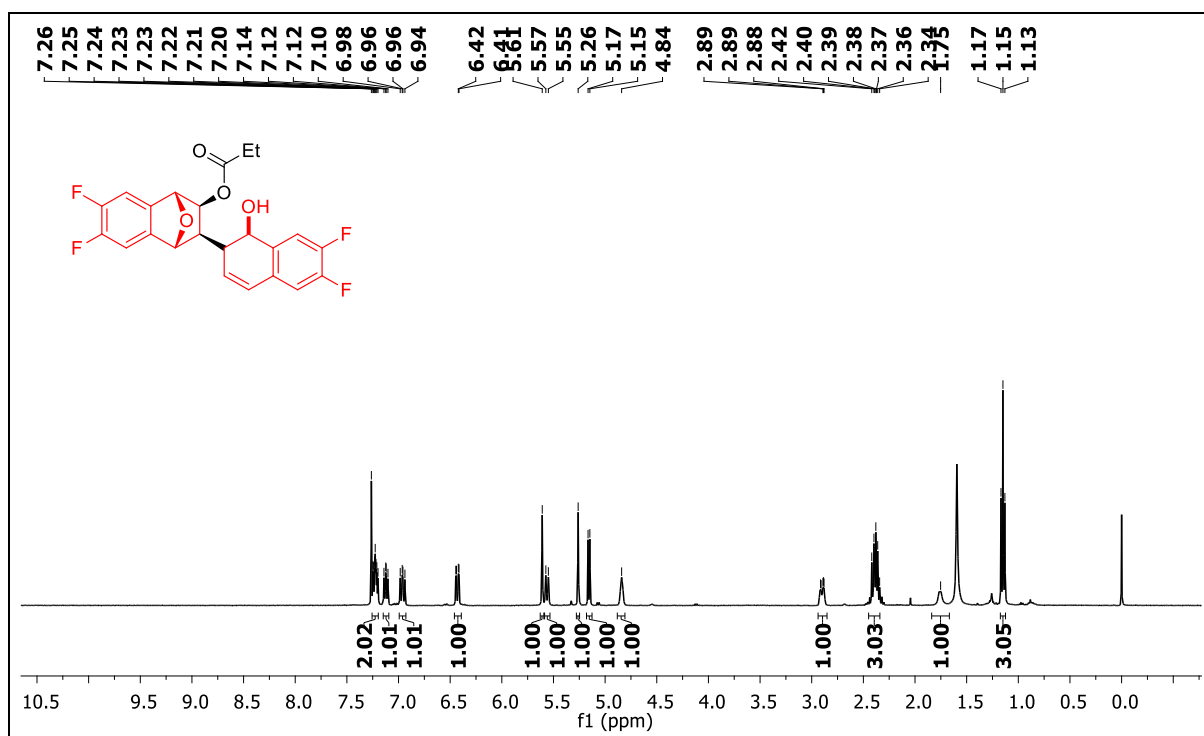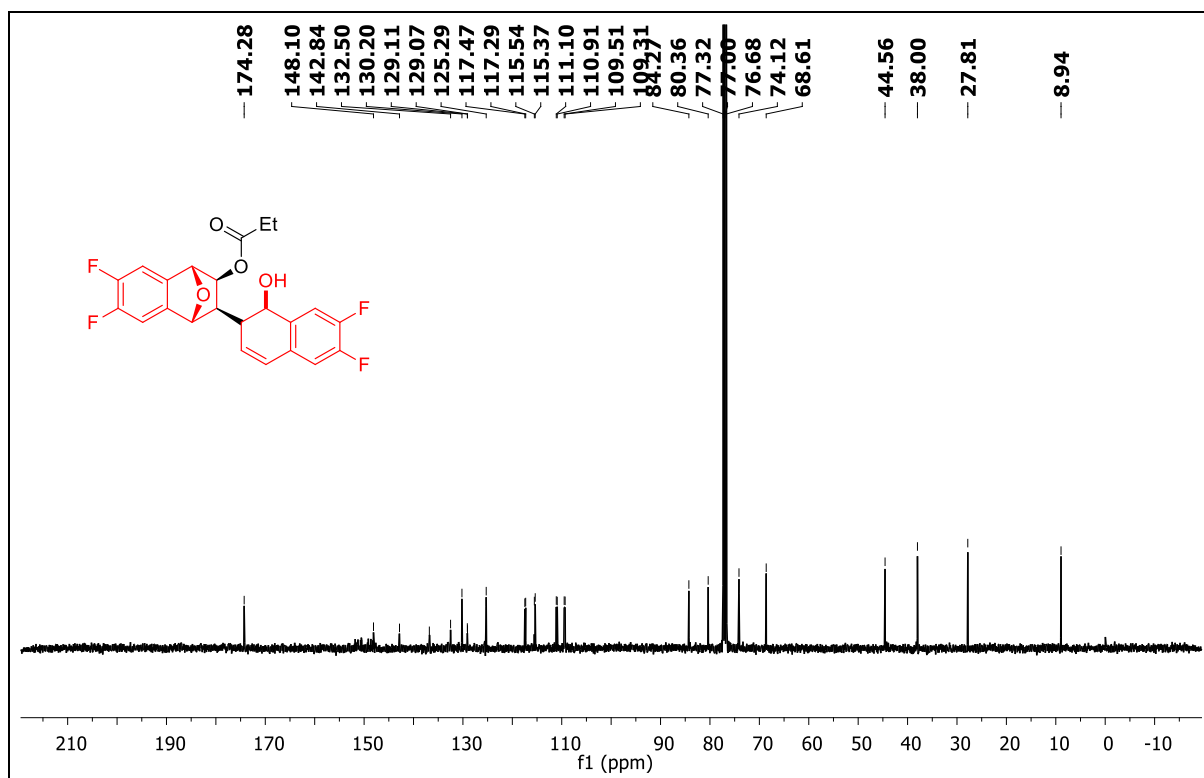

$^{19}\text{F}$  NMR Spectra of Compound **3df** ( $\text{CDCl}_3$ , 471 MHz)

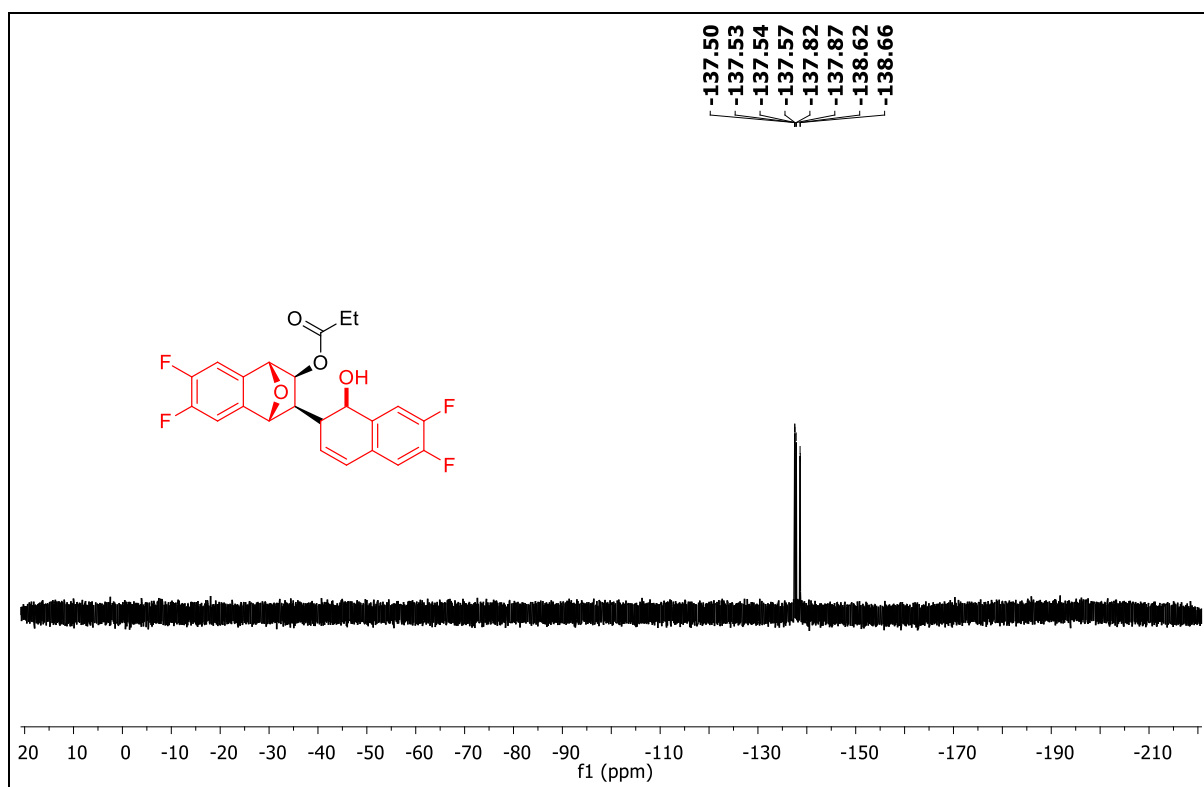

Supplement: d3cc00604b1.pdf [file d3cc00604b1.pdf]
